# Supplementary material for: Prevalence and Disease Expression of Pathogenic and Likely Pathogenic Variants Associated With Inherited Cardiomyopathies in the General Population
Source: PubMed Central journal article supplement (PMC9770140; doi:10.1161/circgen.122.003704), 2022-10-20
Supplement: hcg-15-e003704-s001.pdf [file hcg-15-e003704-s001.pdf]

# Supplemental Material

## Content

|                           |    |
|---------------------------|----|
| Supplemental Methods..... | 2  |
| Supplemental Tables.....  | 5  |
| Supplemental Figures..... | 30 |

## Supplemental Methods

### *Genetic variants in the study population*

We identified carriers of a pathogenic or likely pathogenic variant associated with ARVC, DCM or HCM in individuals from the UKB who underwent whole exome sequencing (WES, n=200,643 at time of analysis). For each inherited cardiomyopathy we selected curated genes classified to have definite, strong or moderate evidence of pathogenicity as defined by the standardized evidence-based framework of Clinical Genome Resource (ClinGen)<sup>32</sup> and curated by James *et al.*<sup>5</sup> for ARVC, Jordan *et al.*<sup>6</sup> for DCM and Ingles *et al.*<sup>7</sup> for HCM. For ARVC we included *DES*, *DSC2*, *DSG2*, *DSP*, *JUP*, *PKP2*, *PLN* and *TMEM43*; for DCM we included *ACTC1*, *ACTN2*, *BAG3*, *DES*, *DSP*, *FLNC*, *JPH2*, *LMNA*, *MYH7*, *NEXN*, *PLN*, *RBM20*, *SCN5A*, *TNNC1*, *TNNI3*, *TNNT2*, *TPM1*, *TTN* and *VCL*; and for HCM we included *ACTC1*, *CSRP3*, *JPH2*, *MYBPC3*, *MYH7*, *MYL2*, *MYL3*, *TNNC1*, *TNNI3*, *TNNT2* and *TPM1* (**Figure 1** and **Table I**). Some genetic variants are associated with two cardiomyopathies (**Table IV**). Individuals carrying these variants were included in the G+ groups of both cardiomyopathies. Next, likely pathogenic and pathogenic variants in these genes were identified using the ClinVar NCBI-NIH database<sup>8</sup> and the Dutch Society for Clinical Genetic Laboratory Diagnostics (Vereniging Klinische Genetische Laboratoriumdiagnostiek, VKGL) database. Laboratories submitting information to these databases use the criteria for variant classification as defined by the American College of Medical Genetics and Genomics and the Association for Molecular Pathology (ACMG-AMP)<sup>33</sup>. An elaborate overview of the ClinVar and VKGL search criteria is given in **Figure 2**. In short, ClinVar was queried using the disease name(s) and filtered for pathogenic and likely pathogenic variants in the curated genes. For variants mentioned in the VKGL database, which does not specify disease associations, association with one of the cardiomyopathies was confirmed in ClinVar. The minor allele frequency

(MAF) cut-off was defined at 0.001, which is the recommended cut-off for including rare variants<sup>34</sup> and still include any potentially at-risk variant carriers. Variants were classified as missense or loss of function (LoF), with LoF being defined as frameshift, stop gain, start lost and canonical splice site variants.

We matched G+ individuals in a 1:4 ratio to UKB individuals without a pathogenic or likely pathogenic variant associated with one of the cardiomyopathies (G-). Matching of this G-control group was based on age, sex, ethnicity and presence of cardiac magnetic resonance imaging (CMR) measurements. Controls are referred to as G- throughout this study.

#### *Data extraction UKB*

#### Disease definitions

An elaborate overview of the disease definitions used in this study is available in **Table II**. In short, individuals were defined to be phenotype positive (P+) if they had an ICD-10 or self-reporting code for cardiomyopathy, DCM, HCM or heart failure, without a diagnosis of chronic ischemic heart disease. No ICD-10 or self-reporting code was available for ARVC in the UKB.

#### CMR and ECG data analysis

We investigated disease expression on cardiac magnetic resonance imaging (CMR, n = 225 unique individuals) and electrocardiography (ECG, n = 231 unique individuals) of G+P- individuals. The full CMR protocol of the UKB has been described in detail<sup>35</sup>. In short, all CMR examinations were performed on a 1.5 Tesla scanner (Magnetom Aera, Syngo Platform VD13A, Siemens Healthcare, Erlangen, Germany). We used a previously developed and

validated deep-learning methodology (AI-CMR<sup>QC</sup>) to extract left (LV) and right ventricular (RV) CMR measurements<sup>36</sup>. In short, cine images of short-axis and 2- and 4-chamber long-axis views were used to automatically calculate LV and RV functional measures (ejection fraction [EF], stroke volume [SV]) and structural measures (end diastolic volume [EDV], end-systolic volume [ESV], LV end diastolic mass [EDM], LV mass to EDV ratio [LVMVR] and LV maximal and regional [16 segments model according the American Heart Association<sup>37</sup>] wall thickness).

The electrocardiography (ECG) variables P duration, P axis, PQ interval, QRS duration, R axis, QTc interval and T axis were extracted from the UKB for G+P- individuals.

#### *Statistical analysis*

Statistical analysis was performed using R version 4.0.2<sup>38</sup>. Continuous values are presented as median [interquartile range] and for comparisons of two groups, Mann-Whitney-U test was used. Categorical data was displayed as absolute frequency (n) and percentages (%) and Fisher's exact test was used to test for differences. The strength of the association between cardiac outcomes and G+ ARVC, DCM and HCM was calculated by the odds ratio with 95% confidence intervals. The latter was also performed stratifying by genes.

A number of included variants are associated with more than one cardiomyopathy. To investigate the effect of the inclusion of individuals in more than one cardiomyopathy, we removed overlapping variants as described in **Table IV** and calculated the odds ratios of the cardiovascular risk factors and diagnoses for these G+ compared to G-.

A p-value of less than 0.05 was considered significant.

**Supplementary Table I: Included curated genes per cardiomyopathy**

| Gene*         | ARVC       | DCM        | HCM        |
|---------------|------------|------------|------------|
| <i>ACTC1</i>  |            | Moderate   | Definitive |
| <i>ACTN2</i>  |            | Moderate   |            |
| <i>BAG3</i>   |            | Definitive |            |
| <i>CSR3</i>   |            |            | Moderate   |
| <i>DES</i>    | Moderate   | Definitive |            |
| <i>DSC2</i>   | Definitive |            |            |
| <i>DSG2</i>   | Definitive |            |            |
| <i>DSP</i>    | Definitive | Strong     |            |
| <i>FLNC</i>   |            | Definitive |            |
| <i>JPH2</i>   |            | Moderate   | Moderate   |
| <i>JUP</i>    | Definitive |            |            |
| <i>LMNA</i>   |            | Definitive |            |
| <i>MYBPC3</i> |            |            | Definitive |
| <i>MYH7</i>   |            | Definitive | Definitive |
| <i>MYL2</i>   |            |            | Definitive |
| <i>MYL3</i>   |            |            | Definitive |
| <i>NEXN</i>   |            | Moderate   |            |
| <i>PKP2</i>   | Definitive |            |            |
| <i>PLN</i>    | Moderate   | Definitive |            |
| <i>RBM20</i>  |            | Definitive |            |
| <i>SCN5A</i>  |            | Definitive |            |
| <i>TMEM43</i> | Definitive |            |            |
| <i>TNNC1</i>  |            | Definitive | Moderate   |
| <i>TNNI3</i>  |            | Moderate   | Definitive |
| <i>TNNT2</i>  |            | Definitive | Definitive |
| <i>TPM1</i>   |            | Moderate   | Definitive |
| <i>TTN</i>    |            | Definitive |            |
| <i>VCL</i>    |            | Moderate   |            |

\* ARVC genes are curated by ref 5, DCM genes by ref 6 and HCM genes by ref 7.  
Pathogenicity is classified as moderate, strong and definitive.

Abbreviations:

*ACTC1* : Actin Alpha Cardiac Muscle 1; *ACTN2* : Alpha-actinin 2;  
ARVC: Arrhythmogenic right ventricular cardiomyopathy; *BAG3* : BAG Cochaperone 3;  
*CSR3* : Cysteine And Glycine Rich Protein 3; DCM: Dilated cardiomyopathy; *DES* : Desmin;  
*DSC2* : Desmocollin 2; *DSG2* : Desmoglein 2; *DSP* : Desmoplakin; *FLNC* : Filamin-C;  
HCM: Hypertrophic cardiomyopathy; *JPH2* : Junctophilin 2; *JUP* : Junction Plakoglobin;  
*LMNA* : Lamin A/C; *MYBPC3* : Myosin Binding Protein C3; *MYH7* : Myosin Heavy Chain 7;  
*MYL2* : Myosin Light Chain 2; *MYL3* : Myosin Light Chain 3; *NEXN* : Nexilin F-Actin Binding Protein;  
*PKP2* : Plakophilin 2; *PLN* : phospholamban; *RBM20* : RNA Binding Motif Protein 20;  
*SCN5A* : Sodium Voltage-Gated Channel Alpha Subunit 5; *TMEM43* : Transmembrane Protein 43;  
*TNNC1* : Troponin C1, Slow Skeletal And Cardiac Type; *TNNI3* : Troponin I3, Cardiac Type;  
*TNNT2* : Troponin T2, Cardiac Type; *TPM1* : Tropomyosin 1; *TTN* : Titin; *VCL* : Vinculin.

**Supplementary Table II: Disease definitions**

| Phenotype                                                                           | Field names                                     | Values (ICD or other coding) |
|-------------------------------------------------------------------------------------|-------------------------------------------------|------------------------------|
| <b>Diabetes</b>                                                                     | Diagnoses ICD10                                 | E10*; E11*; E12*; E13*; E14* |
|                                                                                     | Underlying (primary) cause of death: ICD10      |                              |
|                                                                                     | Contributory (secondary) causes of death: ICD10 |                              |
|                                                                                     | External causes ICD10                           |                              |
|                                                                                     | Diagnoses main ICD10                            |                              |
|                                                                                     | Diagnoses secondary ICD10                       |                              |
| Non-cancer illness code self-reported                                               | 1220; 1222; 1223                                |                              |
| Diabetes diagnosed by doctor                                                        | 1                                               |                              |
| Medication for cholesterol blood pressure or diabetes(, or take exogenous hormones) | 3                                               |                              |
| <b>Hypertension</b>                                                                 | Diagnoses ICD10                                 | I10; I15*                    |
|                                                                                     | Underlying (primary) cause of death: ICD10      |                              |
|                                                                                     | Contributory (secondary) causes of death: ICD10 |                              |
|                                                                                     | External causes ICD10                           |                              |
|                                                                                     | Diagnoses main ICD10                            |                              |
|                                                                                     | Diagnoses secondary ICD10                       |                              |
| Non-cancer illness code self-reported                                               | 1065; 1072                                      |                              |
| Medication for cholesterol blood pressure or diabetes(, or take exogenous hormones) | 2                                               |                              |
| <b>Hypercholesterolaemia</b>                                                        | Diagnoses ICD10                                 | E780                         |
|                                                                                     | Underlying (primary) cause of death: ICD10      |                              |
|                                                                                     | Contributory (secondary) causes of death: ICD10 |                              |
|                                                                                     | External causes ICD10                           |                              |
|                                                                                     | Diagnoses main ICD10                            |                              |
|                                                                                     | Diagnoses secondary ICD10                       |                              |
| Non-cancer illness code self-reported                                               | 1473                                            |                              |
| Medication for cholesterol blood pressure or diabetes(, or take exogenous hormones) | 1                                               |                              |
| <b>Ever smoked</b>                                                                  | Smoking status                                  | 1; 2                         |
| <b>Family heart disease</b>                                                         | Illnesses of father                             | 1                            |
|                                                                                     | Illnesses of mother                             |                              |
|                                                                                     | Illnesses of siblings                           |                              |
| <b>Cardiac problem</b>                                                              | Non-cancer illness code self-reported           | 1066                         |
| <b>Heart failure</b>                                                                | Diagnoses ICD10                                 | I110; I130; I132; I50*       |
|                                                                                     | Underlying (primary) cause of death: ICD10      |                              |
|                                                                                     | Contributory (secondary) causes of death: ICD10 |                              |
|                                                                                     | External causes ICD10                           |                              |
|                                                                                     | Diagnoses main ICD10                            |                              |
|                                                                                     | Diagnoses secondary ICD10                       |                              |
| Non-cancer illness code self-reported                                               | 1076                                            |                              |
| <b>Cardiomyopathy</b>                                                               | Diagnoses ICD10                                 | I42*                         |
|                                                                                     | Underlying (primary) cause of death: ICD10      |                              |
|                                                                                     | Contributory (secondary) causes of death: ICD10 |                              |
|                                                                                     | External causes ICD10                           |                              |
|                                                                                     | Diagnoses main ICD10                            |                              |
|                                                                                     | Diagnoses secondary ICD10                       |                              |
| Non-cancer illness code self-reported                                               | 1079                                            |                              |
| <b>Dilated cardiomyopathy</b>                                                       | Diagnoses ICD10                                 | I420                         |
|                                                                                     | Underlying (primary) cause of death: ICD10      |                              |
|                                                                                     | Contributory (secondary) causes of death: ICD10 |                              |
|                                                                                     | External causes ICD10                           |                              |
|                                                                                     | Diagnoses main ICD10                            |                              |
|                                                                                     | Diagnoses secondary ICD10                       |                              |
| <b>Hypertrophic cardiomyopathy</b>                                                  | Diagnoses ICD10                                 | I421; I422                   |
|                                                                                     | Underlying (primary) cause of death: ICD10      |                              |
|                                                                                     | Contributory (secondary) causes of death: ICD10 |                              |
|                                                                                     | External causes ICD10                           |                              |
|                                                                                     | Diagnoses main ICD10                            |                              |
|                                                                                     | Diagnoses secondary ICD10                       |                              |
| Non-cancer illness code self-reported                                               | 1588                                            |                              |
| <b>Ventricular arrhythmias</b>                                                      | Diagnoses ICD10                                 | I470; I472; I490; I493       |
|                                                                                     | Underlying (primary) cause of death: ICD10      |                              |
|                                                                                     | Contributory (secondary) causes of death: ICD10 |                              |
|                                                                                     | External causes ICD10                           |                              |
|                                                                                     | Diagnoses main ICD10                            |                              |
|                                                                                     | Diagnoses secondary ICD10                       |                              |
| <b>Atrial arrhythmias</b>                                                           | Diagnoses ICD10                                 | I48*; I471; I491             |
|                                                                                     | Underlying (primary) cause of death: ICD10      |                              |
|                                                                                     | Contributory (secondary) causes of death: ICD10 |                              |
|                                                                                     | External causes ICD10                           |                              |
|                                                                                     | Diagnoses main ICD10                            |                              |
|                                                                                     | Diagnoses secondary ICD10                       |                              |
| Non-cancer illness code self-reported                                               | 1471; 1483; 1487                                |                              |
| <b>Heart arrhythmia</b>                                                             | Non-cancer illness code self-reported           | 1077                         |
| <b>Chronic ischemic heart disease</b>                                               | Diagnoses ICD10                                 | I25*                         |
|                                                                                     | Underlying (primary) cause of death: ICD10      |                              |
|                                                                                     | Contributory (secondary) causes of death: ICD10 |                              |
|                                                                                     | External causes ICD10                           |                              |
|                                                                                     | Diagnoses main ICD10                            |                              |
|                                                                                     | Diagnoses secondary ICD10                       |                              |

| Phenotype                     | Field names                                                                                                                                                                                    | Values (ICD or other coding)                   |
|-------------------------------|------------------------------------------------------------------------------------------------------------------------------------------------------------------------------------------------|------------------------------------------------|
| Acute myocardial infarction   | Diagnoses ICD10<br>Underlying (primary) cause of death: ICD10<br>Contributory (secondary) causes of death: ICD10<br>External causes ICD10<br>Diagnoses main ICD10<br>Diagnoses secondary ICD10 | I21*; I22*; I248; I249                         |
|                               | Non-cancer illness code self-reported                                                                                                                                                          | I075                                           |
| Cardiac arrest                | Diagnoses ICD10<br>Underlying (primary) cause of death: ICD10<br>Contributory (secondary) causes of death: ICD10<br>External causes ICD10<br>Diagnoses main ICD10<br>Diagnoses secondary ICD10 | I46*                                           |
|                               | Non-cancer illness code self-reported                                                                                                                                                          | I074                                           |
| Conduction disorders          | Diagnoses ICD10<br>Underlying (primary) cause of death: ICD10<br>Contributory (secondary) causes of death: ICD10<br>External causes ICD10<br>Diagnoses main ICD10<br>Diagnoses secondary ICD10 | I44*; I45*                                     |
|                               | Non-cancer illness code self-reported                                                                                                                                                          | I078; I488; I489; I490; I584; I585; I586; I587 |
| Valvular disease              | Diagnoses ICD10<br>Underlying (primary) cause of death: ICD10<br>Contributory (secondary) causes of death: ICD10<br>External causes ICD10<br>Diagnoses main ICD10<br>Diagnoses secondary ICD10 | I34*; I35*; I36*; I37*; I05*; I06*; I07*; I08* |
|                               | Non-cancer illness code self-reported                                                                                                                                                          | I078; I488; I489; I490; I584; I585; I586; I587 |
| Congenital heart disease      | Diagnoses ICD10<br>Underlying (primary) cause of death: ICD10<br>Contributory (secondary) causes of death: ICD10<br>External causes ICD10<br>Diagnoses main ICD10<br>Diagnoses secondary ICD10 | Q20*; Q21*; Q22*; Q23*; Q24*; Q25*; Q26*       |
|                               | Non-cancer illness code self-reported                                                                                                                                                          | I112; I113; I114; I115; I121                   |
| Pulmonary obstructive disease | Diagnoses ICD10<br>Underlying (primary) cause of death: ICD10<br>Contributory (secondary) causes of death: ICD10<br>External causes ICD10<br>Diagnoses main ICD10<br>Diagnoses secondary ICD10 | J44*; J43*; I26*; I27*                         |
|                               | Non-cancer illness code self-reported                                                                                                                                                          | I112; I113; I114; I115; I121                   |
| All-cause mortality           | Date of Death                                                                                                                                                                                  | Any non-missing value                          |
| Cardiovascular death          | Underlying (primary) cause of death: ICD10<br>Contributory (secondary) causes of death: ICD10                                                                                                  | I*                                             |

\* indicates starting with previously indicated code.

Supplementary Table III: Extensive baseline table

|                                                                  | Controls G-                 |                             |                               |         |                             | ARVC G+                       |                             |         |  |  |
|------------------------------------------------------------------|-----------------------------|-----------------------------|-------------------------------|---------|-----------------------------|-------------------------------|-----------------------------|---------|--|--|
|                                                                  | Overall<br>9,972 (100)      | Diagnosed<br>87 (0.8)       | Non-Diagnosed<br>9,885 (99.2) | Missing | Overall<br>347 (100)        | Diagnosed<br>4 (1.2)          | Non-Diagnosed<br>343 (98.8) | Missing |  |  |
| <b>n (%)</b>                                                     | 9,972 (100)                 | 87 (0.8)                    | 9,885 (99.2)                  |         | 347 (100)                   | 4 (1.2)                       | 343 (98.8)                  |         |  |  |
| <b>Sex = Female (%)</b>                                          | 5,436 (54.5)                | 35 (40.2)                   | 5,401 (54.6)                  | 0       | 187 (53.9)                  | 2 (50.0)                      | 185 (53.9)                  | 0       |  |  |
| <b>Age (median [IQR])</b>                                        | 57.00 [49.00, 63.00]        | 62.00 [49.00, 66.00]        | 57.00 [49.00, 63.00]          | 0       | 57.00 [50.00, 64.00]        | 55.50 [52.25, 58.50]          | 57.00 [50.00, 64.00]        | 0       |  |  |
| <b>Ethnicity (%)</b>                                             |                             |                             |                               | 1       |                             |                               |                             | 0.6     |  |  |
| Asian                                                            | 1,076 (10.9)                | 5 (5.8)                     | 1,071 (10.9)                  | 0       | 10 (2.9)                    | 0 (0.0)                       | 10 (2.9)                    | 0       |  |  |
| Black                                                            | 164 (1.7)                   | 3 (3.5)                     | 161 (1.6)                     | 0       | 7 (2.0)                     | 1 (25.0)                      | 6 (1.8)                     | 0       |  |  |
| Chinese                                                          | 56 (0.6)                    | 1 (1.2)                     | 55 (0.6)                      | 0       | 11 (3.2)                    | 0 (0.0)                       | 11 (3.2)                    | 0       |  |  |
| Mixed                                                            | 132 (1.3)                   | 2 (2.3)                     | 130 (1.3)                     | 0       | 1 (0.3)                     | 0 (0.0)                       | 1 (0.3)                     | 0       |  |  |
| Other                                                            | 160 (1.6)                   | 1 (1.2)                     | 159 (1.6)                     | 0       | 5 (1.4)                     | 0 (0.0)                       | 5 (1.5)                     | 0       |  |  |
| White                                                            | 8,288 (83.9)                | 74 (86.0)                   | 8,214 (83.9)                  | 0       | 311 (90.1)                  | 3 (75.0)                      | 308 (90.3)                  | 0       |  |  |
| <b>CARDIOVASCULAR RISK FACTORS</b>                               |                             |                             |                               |         |                             |                               |                             |         |  |  |
| <b>BMI (median [IQR])</b>                                        | 26.73 [24.15, 29.82]        | 28.83 [25.33, 32.20]        | 26.71 [24.15, 29.80]          | 0.5     | 26.40 [24.03, 30.32]        | 29.29 [27.22, 32.45]          | 26.36 [24.02, 30.18]        | 0.3     |  |  |
| <b>Diabetes (%)</b>                                              | 914 (9.2)                   | 21 (24.1)                   | 893 (9.0)                     | 0       | 35 (10.1)                   | 1 (25.0)                      | 34 (9.9)                    | 0       |  |  |
| <b>Hypertension (%)</b>                                          | 3,420 (34.3)                | 60 (69.0)                   | 3,360 (34.0)                  | 0       | 116 (33.4)                  | 3 (75.0)                      | 113 (32.9)                  | 0       |  |  |
| <b>Mean systolic blood pressure (median [IQR])</b>               | 135.50 [124.00, 149.00]     | 144.00 [130.00, 155.50]     | 135.50 [124.00, 149.00]       | 0.1     | 136.00 [124.00, 147.50]     | 128.25 [120.62, 134.38]       | 136.25 [124.00, 147.50]     | 0.3     |  |  |
| <b>Mean diastolic blood pressure (median [IQR])</b>              | 82.00 [75.00, 88.50]        | 84.00 [76.50, 91.50]        | 81.50 [75.00, 88.50]          | 0.1     | 81.50 [75.00, 87.88]        | 82.00 [77.38, 85.25]          | 81.50 [75.00, 88.00]        | 0.3     |  |  |
| <b>Hypercholesterolaemia (%)</b>                                 | 2,416 (24.2)                | 34 (39.1)                   | 2,382 (24.1)                  | 0       | 86 (24.8)                   | 3 (75.0)                      | 83 (24.2)                   | 0       |  |  |
| <b>Total cholesterol (median [IQR])</b>                          | 5.61 [4.86, 6.38]           | 5.23 [4.39, 6.10]           | 5.61 [4.87, 6.38]             | 4.3     | 5.51 [4.82, 6.40]           | 4.97 [4.50, 5.78]             | 5.51 [4.83, 6.40]           | 4.6     |  |  |
| <b>HDL (median [IQR])</b>                                        | 1.38 [1.16, 1.65]           | 1.29 [1.13, 1.56]           | 1.38 [1.16, 1.65]             | 11.3    | 1.38 [1.16, 1.64]           | 1.48 [1.30, 1.65]             | 1.38 [1.16, 1.64]           | 9.2     |  |  |
| <b>LDL (median [IQR])</b>                                        | 3.50 [2.92, 4.09]           | 3.22 [2.54, 3.81]           | 3.50 [2.92, 4.09]             | 4.6     | 3.39 [2.87, 4.04]           | 3.06 [2.71, 3.58]             | 3.40 [2.88, 4.04]           | 4.6     |  |  |
| <b>Ever Smoked (%)</b>                                           | 4,132 (41.4)                | 50 (57.5)                   | 4,082 (41.3)                  | 0       | 161 (46.4)                  | 2 (50.0)                      | 159 (46.4)                  | 0       |  |  |
| <b>MET minutes per week for walking (median [IQR])</b>           | 693.00 [297.00, 1,386.00]   | 528.00 [255.75, 1,608.75]   | 693.00 [297.00, 1,386.00]     | 19.8    | 693.00 [297.00, 1,386.00]   | 569.25 [247.50, 952.88]       | 693.00 [297.00, 1,386.00]   | 19.3    |  |  |
| <b>MET minutes per week for moderate activity (median [IQR])</b> | 480.00 [120.00, 1,200.00]   | 480.00 [100.00, 1,680.00]   | 480.00 [120.00, 1,200.00]     | 19.8    | 480.00 [120.00, 1,200.00]   | 900.00 [640.00, 1,140.00]     | 480.00 [120.00, 1,200.00]   | 19.3    |  |  |
| <b>MET minutes per week for vigorous activity (median [IQR])</b> | 240.00 [0.00, 960.00]       | 0.00 [0.00, 820.00]         | 240.00 [0.00, 960.00]         | 19.8    | 320.00 [0.00, 960.00]       | 1,060.00 [540.00, 1,410.00]   | 320.00 [0.00, 960.00]       | 19.3    |  |  |
| <b>TOTAL MET minutes per week (median [IQR])</b>                 | 1,367.50 [810.00, 3,452.50] | 1,367.50 [478.50, 3,834.00] | 1,367.50 [810.00, 3,452.50]   | 19.8    | 2,001.00 [922.50, 3,550.50] | 2,529.25 [1,517.50, 3,412.88] | 1,367.50 [810.00, 3,452.50] | 19.3    |  |  |
| <b>Family heart disease (%)</b>                                  | 4,458 (44.7)                | 34 (39.1)                   | 4,424 (44.8)                  | 0       | 179 (51.6)                  | 4 (100.0)                     | 175 (51.0)                  | 0       |  |  |
| <b>CARDIAC DISEASES/OUTCOMES</b>                                 |                             |                             |                               |         |                             |                               |                             |         |  |  |
| <b>Cardiac problem (%)</b>                                       | 41 (0.4)                    | 2 (2.3)                     | 39 (0.4)                      | 0       | 3 (0.9)                     | 0 (0.0)                       | 3 (0.9)                     | 0       |  |  |
| <b>Heart failure (%)</b>                                         | 182 (1.8)                   | 74 (85.1)                   | 108 (1.1)                     | 0       | 9 (2.6)                     | 2 (50.0)                      | 7 (2.0)                     | 0       |  |  |
| <b>Cardiomyopathy (%)</b>                                        | 37 (0.4)                    | 26 (29.9)                   | 11 (0.1)                      | 0       | 3 (0.9)                     | 3 (75.0)                      | 0 (0.0)                     | 0       |  |  |
| <b>Dilated cardiomyopathy (%)</b>                                | 14 (0.1)                    | 8 (9.2)                     | 6 (0.1)                       | 0       | 2 (0.6)                     | 2 (50.0)                      | 0 (0.0)                     | 0       |  |  |
| <b>Hypertrophic cardiomyopathy (%)</b>                           | 8 (0.1)                     | 7 (8.0)                     | 1 (0.0)                       | 0       | 1 (0.3)                     | 1 (25.0)                      | 0 (0.0)                     | 0       |  |  |
| <b>Ventricular arrhythmias (%)</b>                               | 33 (0.3)                    | 3 (3.4)                     | 30 (0.3)                      | 0       | 7 (2.0)                     | 1 (25.0)                      | 6 (1.7)                     | 0       |  |  |
| <b>Atrial arrhythmias (%)</b>                                    | 191 (1.9)                   | 19 (21.8)                   | 172 (1.7)                     | 0       | 7 (2.0)                     | 0 (0.0)                       | 7 (2.0)                     | 0       |  |  |
| <b>Heart arrhythmia (%)</b>                                      | 54 (0.5)                    | 2 (2.3)                     | 52 (0.5)                      | 0       | 6 (1.7)                     | 1 (25.0)                      | 5 (1.5)                     | 0       |  |  |
| <b>Chronic ischemic heart disease (%)</b>                        | 725 (7.3)                   | 0 (0.0)                     | 725 (7.3)                     | 0       | 35 (10.1)                   | 0 (0.0)                       | 35 (10.2)                   | 0       |  |  |
| <b>Acute myocardial infarction (%)</b>                           | 298 (3.0)                   | 1 (1.1)                     | 297 (3.0)                     | 0       | 15 (4.3)                    | 0 (0.0)                       | 15 (4.4)                    | 0       |  |  |
| <b>Cardiac arrest (%)</b>                                        | 34 (0.3)                    | 1 (1.1)                     | 33 (0.3)                      | 0       | 0 (0.0)                     | 0 (0.0)                       | 0 (0.0)                     | 0       |  |  |
| <b>Angina pectoris (%)</b>                                       | 312 (3.1)                   | 2 (2.3)                     | 310 (3.1)                     | 0       | 16 (4.6)                    | 0 (0.0)                       | 16 (4.7)                    | 0       |  |  |
| <b>Conduction disorders (%)</b>                                  | 151 (1.5)                   | 10 (11.5)                   | 141 (1.4)                     | 0       | 8 (2.3)                     | 0 (0.0)                       | 8 (2.3)                     | 0       |  |  |
| <b>Valvular disease (%)</b>                                      | 244 (2.4)                   | 23 (26.4)                   | 221 (2.2)                     | 0       | 11 (3.2)                    | 1 (25.0)                      | 10 (2.9)                    | 0       |  |  |
| <b>Congenital heart disease (%)</b>                              | 28 (0.3)                    | 3 (3.4)                     | 25 (0.3)                      | 0       | 2 (0.6)                     | 0 (0.0)                       | 2 (0.6)                     | 0       |  |  |
| <b>Pulmonary obstructive disease (%)</b>                         | 494 (5.0)                   | 34 (27.6)                   | 470 (4.8)                     | 0       | 25 (7.2)                    | 0 (0.0)                       | 25 (7.3)                    | 0       |  |  |
| <b>Cardiovascular death (%)</b>                                  | 181 (1.8)                   | 13 (14.9)                   | 168 (1.7)                     | 0       | 11 (3.2)                    | 0 (0.0)                       | 11 (3.2)                    | 0       |  |  |
| <b>All-cause mortality (%)</b>                                   | 513 (5.1)                   | 27 (31.0)                   | 486 (4.9)                     | 0       | 19 (5.5)                    | 0 (0.0)                       | 19 (5.5)                    | 0       |  |  |
| <b>ECG MEASUREMENTS</b>                                          |                             |                             |                               |         |                             |                               |                             |         |  |  |
| <b>n (%)</b>                                                     | 1,062 (10.6)                | 4 (4.6)                     | 1,058 (10.7)                  |         | 32 (9.2)                    | 0 (0.0)                       | 32 (9.3)                    |         |  |  |
| <b>P duration (median [IQR])</b>                                 | 100.00 [90.00, 108.00]      | 90.00 [82.00, 111.00]       | 100.00 [90.00, 108.00]        | 89.8    | 100.00 [93.50, 111.50]      | NA                            | 100.00 [93.50, 111.50]      | 90.8    |  |  |
| <b>P axis (median [IQR])</b>                                     | 55.00 [40.25, 67.00]        | 47.00 [47.00, 47.00]        | 55.00 [40.00, 67.00]          | 93.1    | 54.00 [42.25, 61.50]        | NA                            | 54.00 [42.25, 61.50]        | 94.8    |  |  |
| <b>PQ interval (median [IQR])</b>                                | 160.00 [145.50, 178.00]     | 188.00 [188.00, 188.00]     | 160.00 [145.50, 178.00]       | 93.1    | 171.00 [147.00, 183.00]     | NA                            | 171.00 [147.00, 183.00]     | 94.8    |  |  |
| <b>QRS duration (median [IQR])</b>                               | 86.00 [80.00, 94.00]        | 93.00 [89.50, 97.00]        | 86.00 [80.00, 94.00]          | 89.4    | 88.00 [81.50, 96.00]        | NA                            | 88.00 [81.50, 96.00]        | 90.8    |  |  |
| <b>R axis (median [IQR])</b>                                     | 34.00 [17.00, 58.00]        | -48.00 [-48.00, -48.00]     | 34.00 [17.00, 58.00]          | 92.9    | 23.50 [-1.75, 50.00]        | NA                            | 23.50 [-1.75, 50.00]        | 94.8    |  |  |
| <b>QTc interval (median [IQR])</b>                               | 417.00 [402.00, 433.00]     | 511.00 [511.00, 511.00]     | 417.00 [402.00, 433.00]       | 92.9    | 429.50 [403.25, 440.00]     | NA                            | 429.50 [403.25, 440.00]     | 94.8    |  |  |
| <b>T axis (median [IQR])</b>                                     | 40.00 [23.00, 55.25]        | 92.00 [92.00, 92.00]        | 40.00 [23.00, 55.00]          | 92.9    | 35.50 [20.25, 54.25]        | NA                            | 35.50 [20.25, 54.25]        | 94.8    |  |  |
| <b>CMR MEASUREMENTS</b>                                          |                             |                             |                               |         |                             |                               |                             |         |  |  |
| <b>n (%)</b>                                                     | 990 (9.9)                   | 4 (4.6)                     | 986 (10.0)                    |         | 33 (9.5)                    | 0 (0.0)                       | 33 (9.6)                    |         |  |  |
| <b>RVEDVi (median [IQR])</b>                                     | 80.18 [70.62, 90.27]        | 79.28 [79.28, 79.28]        | 80.19 [70.61, 90.27]          | 91      | 79.14 [73.73, 92.49]        | NA                            | 79.14 [73.73, 92.49]        | 91.1    |  |  |
| <b>RVESVi (median [IQR])</b>                                     | 32.89 [27.38, 39.68]        | 20.93 [20.93, 20.93]        | 32.90 [27.42, 39.70]          | 91      | 35.16 [29.98, 38.70]        | NA                            | 35.16 [29.98, 38.70]        | 91.1    |  |  |
| <b>RVSVi (median [IQR])</b>                                      | 46.55 [40.92, 52.84]        | 58.25 [58.25, 58.25]        | 46.53 [40.91, 52.81]          | 91      | 48.22 [41.97, 52.24]        | NA                            | 48.22 [41.97, 52.24]        | 91.1    |  |  |
| <b>RVESf (median [IQR])</b>                                      | 58.38 [54.19, 62.76]        | 73.60 [73.60, 73.60]        | 58.37 [54.19, 62.74]          | 91      | 58.20 [53.20, 62.06]        | NA                            | 58.20 [53.20, 62.06]        | 91.1    |  |  |
| <b>RVPER (median [IQR])</b>                                      | 388.72 [316.56, 465.82]     | 446.55 [446.55, 446.55]     | 388.66 [316.54, 465.97]       | 91      | 405.50 [291.73, 489.37]     | NA                            | 405.50 [291.73, 489.37]     | 91.1    |  |  |
| <b>RVPRf (median [IQR])</b>                                      | 300.61 [245.17, 364.00]     | 373.24 [373.24, 373.24]     | 300.34 [245.12, 363.44]       | 91      | 302.85 [225.65, 375.82]     | NA                            | 302.85 [225.65, 375.82]     | 91.1    |  |  |
| <b>RVPAFR (median [IQR])</b>                                     | 282.95 [222.68, 360.32]     | 547.72 [547.72, 547.72]     | 282.86 [222.56, 360.07]       | 91      | 274.74 [213.71, 343.90]     | NA                            | 274.74 [213.71, 343.90]     | 91.1    |  |  |
| <b>LVEDVi (median [IQR])</b>                                     | 74.33 [66.34, 83.11]        | 64.68 [64.68, 64.68]        | 74.37 [66.38, 83.15]          | 91.9    | 80.77 [73.11, 88.68]        | NA                            | 80.77 [73.11, 88.68]        | 91.6    |  |  |
| <b>LVESVi (median [IQR])</b>                                     | 30.02 [25.12, 35.70]        | 26.43 [26.43, 26.43]        | 30.02 [25.13, 35.72]          | 91.9    | 31.74 [25.91, 39.55]        | NA                            | 31.74 [25.91, 39.55]        | 91.6    |  |  |
| <b>LVSVi (median [IQR])</b>                                      | 44.03 [39.34, 50.28]        | 38.25 [38.25, 38.25]        | 44.05 [39.37, 50.30]          | 91.9    | 46.82 [43.25, 50.82]        | NA                            | 46.82 [43.25, 50.82]        | 91.6    |  |  |
| <b>LVEF (median [IQR])</b>                                       | 59.47 [55.29, 63.52]        | 59.14 [51.51, 63.31]        | 59.48 [55.29, 63.52]          | 91.9    | 59.69 [56.59, 66.23]        | NA                            | 59.69 [56.59, 66.23]        | 91.6    |  |  |
| <b>LVPR (median [IQR])</b>                                       | 373.80 [302.29, 452.71]     | 284.40 [256.83, 364.56]     | 373.81 [302.44, 453.27]       | 91.9    | 407.32 [307.20, 455.45]     | NA                            | 407.32 [307.20, 455.45]     | 91.6    |  |  |
| <b>LVPAFR (median [IQR])</b>                                     | 321.31 [259.23, 385.16]     | 201.74 [180.85, 219.92]     | 321.49 [259.95, 385.68]       | 91.9    | 346.24 [280.79, 422.04]     | NA                            | 346.24 [280.79, 422.04]     | 91.6    |  |  |
| <b>LVPAFRf (median [IQR])</b>                                    | 233.66 [167.35, 306.30]     | 363.87 [208.97, 466.96]     | 233.50 [167.46, 305.08]       | 91.9    | 208.66 [158.63, 298.40]     | NA                            | 208.66 [158.63, 298.40]     | 91.6    |  |  |
| <b>LVEDMf (median [IQR])</b>                                     | 41.88 [36.52, 48.62]        | 45.76 [34.02, 48.75]        | 41.85 [36.55, 48.61]          | 91.9    | 42.81 [36.04, 48.38]        | NA                            | 42.81 [36.04, 48.38]        | 91.6    |  |  |
| <b>LVMMVf (median [IQR])</b>                                     | 0.56 [0.50, 0.62]           | 0.70 [0.56, 0.70]           | 0.56 [0.50, 0.62]             | 91.9    | 0.55 [0.49, 0.60]           | NA                            | 0.55 [0.49, 0.60]           | 91.6    |  |  |
| <b>LVEDVf/RVEDVf (median [IQR])</b>                              | 0.93 [0.86, 1.03]           | 0.93 [0.93, 0.93]           | 0.93 [0.86, 1.03]             | 92.2    | 0.94 [0.90, 1.05]           | NA                            | 0.94 [0.90, 1.05]           | 91.6    |  |  |
| <b>LVESVf/RVESVf (median [IQR])</b>                              | 0.91 [0.80, 1.04]           | 1.15 [1.15, 1.15]           | 0.91 [0.80, 1.04]             | 92.2    | 0.91 [0.82, 1.00]           | NA                            | 0.91 [0.82, 1.00]           | 91.6    |  |  |
| <b>peakEcc (median [IQR])</b>                                    | -22.70 [-24.98, -20.43]     | -21.60 [-21.61, -21.59]     | -22.72 [-24.98, -20.42]       | 93.7    | -22.87 [-26.90, -21.63]     | NA                            | -22.87 [-26.90, -21.63]     | 94.2    |  |  |
| <b>TPKEcc (median [IQR])</b>                                     | 331.31 [309.83, 354.66]     | 325.97 [321.27, 330.67]     | 331.31 [309.75, 354.68]       | 93.7    | 326.90 [318.45, 363.83]     | NA                            | 326.90 [318.45, 363.83]     | 94.2    |  |  |
| <b>peakEII2Ch (median [IQR])</b>                                 | -21.19 [-23.34, -18.93]     | -23.89 [-23.89, -23.89]     | -21.17 [-23.32, -18.93]       | 93.8    | -21.37 [-23.84, -19.31]     | NA                            | -21.37 [-23.84, -19.31]     | 93.9    |  |  |
| <b>TPKEII2Ch (median [IQR])</b>                                  | 349.86 [321.84, 379.10]     | 388.50 [388.50, 388.50]     | 349.86 [321.81, 379.08]       | 93.9    | 346.80 [321.44, 370.50]     | NA                            | 346.80 [321.44, 370.50]     | 93.9    |  |  |
| <b>peakEII4Ch (median [IQR])</b>                                 | 23.30 [-25.97, -21.37]      | -21.40 [-21.40, -21.40]     | 23.30 [-25.99, -21.37]        | 93.9    | 24.25 [-26.79, -21.39]      | NA                            | 24.25 [-26.79, -21.39]      | 93.7    |  |  |
| <b>TPKEII4Ch (median [IQR])</b>                                  | 357.53 [327.07, 397.64]     | 360.78 [360.78, 360.78]     | 357.30 [326.96, 397.81]       | 93.9    | 354.30 [328.00, 406.56]     | NA                            | 354.30 [328.00, 406.56]     | 93.9    |  |  |
| <b>Wall thickness segment 1 (median [IQR])</b>                   | 7.65 [6.81, 8.50]           | 7.04 [5.94, 8.14]           | 7.65 [6.81, 8.49]             | 93.2    | 7.05 [6.26, 8.57]           | NA                            | 7.05 [6.26, 8.57]           | 94.2    |  |  |
| <b>Wall thickness segment 2 (median [IQR])</b>                   | 6.75 [5.75, 7.91]           | 7.50 [6.70, 8.31]           | 6.75 [5.74, 7.90]             | 93.2    | 6.81 [5.24, 7.75]           | NA                            | 6.81 [5.24, 7.75]           | 94.2    |  |  |
| <b>Wall thickness segment 3 (median [IQR])</b>                   | 6.05 [5.17, 6.96]           | 7.60 [6.78, 8.42]           | 6.05 [5.17, 6.95]             | 93.2    | 5.58 [4.74, 7.16]           | NA                            | 5.58 [4.74, 7.16]           | 94.2    |  |  |
| <b>Wall thickness segment 4 (median [IQR])</b>                   | 6.54 [5.82, 7.22]           | 8.31 [7.66, 8.97]           | 6.54 [5.81, 7.21]             | 93.2    | 6.06 [5.49, 6.76]           | NA                            | 6.06 [5.49, 6.76]           | 94.2    |  |  |
| <b>Wall thickness segment 5 (median [IQR])</b>                   | 6.20 [5.62, 6.96]           | 6.33 [5.27, 7.39]           | 6.20 [5.62                    |         |                             |                               |                             |         |  |  |



Supplementary Table III: Extensive baseline table

|                                                                  | Controls G-                 |                             |                               |         |                             | DCM G+                     |                             |         |  |
|------------------------------------------------------------------|-----------------------------|-----------------------------|-------------------------------|---------|-----------------------------|----------------------------|-----------------------------|---------|--|
|                                                                  | Overall<br>9,972 (100)      | Diagnosed<br>87 (0.8)       | Non-Diagnosed<br>9,885 (99.2) | Missing | Overall<br>800 (100)        | Diagnosed<br>25 (3.1)      | Non-Diagnosed<br>775 (96.9) | Missing |  |
| <b>n (%)</b>                                                     |                             |                             |                               |         |                             |                            |                             |         |  |
| <b>Sex = Female (%)</b>                                          | 5,436 (54.5)                | 35 (40.2)                   | 5,401 (54.6)                  | 0       | 450 (56.2)                  | 15 (60.0)                  | 435 (56.1)                  | 0       |  |
| <b>Age (median [IQR])</b>                                        | 57.00 [49.00, 63.00]        | 62.00 [49.00, 66.00]        | 57.00 [49.00, 63.00]          | 0       | 58.00 [50.75, 64.00]        | 62.00 [53.00, 66.00]       | 57.00 [50.00, 63.00]        | 0       |  |
| <b>Ethnicity (%)</b>                                             |                             |                             |                               | 1       |                             |                            |                             | 0.6     |  |
| Asian                                                            | 1,076 (10.9)                | 5 (5.8)                     | 1,071 (10.9)                  | 0       | 8 (1.0)                     | 1 (4.0)                    | 7 (9.0)                     | 0       |  |
| Black                                                            | 164 (1.7)                   | 3 (3.5)                     | 161 (1.6)                     | 0       | 12 (1.5)                    | 1 (4.0)                    | 11 (1.4)                    | 0       |  |
| Chinese                                                          | 56 (0.6)                    | 1 (1.2)                     | 55 (0.6)                      | 0       | 2 (0.3)                     | 0 (0.0)                    | 2 (0.3)                     | 0       |  |
| Mixed                                                            | 132 (1.3)                   | 2 (2.3)                     | 130 (1.3)                     | 0       | 4 (0.5)                     | 0 (0.0)                    | 4 (0.5)                     | 0       |  |
| Other                                                            | 160 (1.6)                   | 1 (1.2)                     | 159 (1.6)                     | 0       | 9 (1.1)                     | 0 (0.0)                    | 9 (1.2)                     | 0       |  |
| White                                                            | 8,288 (83.9)                | 74 (86.0)                   | 8,214 (83.9)                  | 0       | 760 (95.6)                  | 23 (92.0)                  | 737 (95.7)                  | 0       |  |
| <b>CARDIOVASCULAR RISK FACTORS</b>                               |                             |                             |                               |         |                             |                            |                             |         |  |
| <b>BMI (median [IQR])</b>                                        | 26.73 [24.15, 29.82]        | 28.83 [25.33, 32.20]        | 26.71 [24.15, 29.80]          | 0.5     | 26.92 [24.06, 29.90]        | 27.69 [24.21, 30.90]       | 26.92 [24.06, 29.88]        | 0.4     |  |
| <b>Diabetes (%)</b>                                              | 914 (9.2)                   | 21 (24.1)                   | 893 (9.0)                     | 0       | 62 (7.8)                    | 1 (4.0)                    | 61 (7.9)                    | 0       |  |
| <b>Hypertension (%)</b>                                          | 3,420 (34.3)                | 60 (69.0)                   | 3,360 (34.0)                  | 0       | 287 (35.9)                  | 16 (72.0)                  | 269 (34.7)                  | 0       |  |
| <b>Mean systolic blood pressure (median [IQR])</b>               | 135.50 [124.00, 149.00]     | 144.00 [130.00, 155.50]     | 135.50 [124.00, 149.00]       | 0.1     | 136.00 [124.00, 149.00]     | 136.50 [129.50, 149.50]    | 135.75 [124.00, 149.00]     | 0.1     |  |
| <b>Mean diastolic blood pressure (median [IQR])</b>              | 82.00 [75.00, 88.50]        | 84.00 [76.50, 91.50]        | 81.50 [75.00, 88.50]          | 0.1     | 81.50 [74.50, 89.00]        | 80.50 [77.00, 88.50]       | 81.50 [74.50, 89.00]        | 0.1     |  |
| <b>Hypercholesterolaemia (%)</b>                                 | 2,416 (24.2)                | 34 (39.1)                   | 2,382 (24.1)                  | 0       | 211 (26.4)                  | 13 (52.0)                  | 198 (25.5)                  | 0       |  |
| <b>Total cholesterol (median [IQR])</b>                          | 5.61 [4.86, 6.38]           | 5.23 [4.39, 6.10]           | 5.61 [4.87, 6.38]             | 4.3     | 5.61 [4.90, 6.33]           | 5.20 [4.79, 6.24]          | 5.62 [4.93, 6.34]           | 4.2     |  |
| <b>HDL (median [IQR])</b>                                        | 1.38 [1.16, 1.65]           | 1.29 [1.13, 1.56]           | 1.38 [1.16, 1.65]             | 11.3    | 1.40 [1.17, 1.65]           | 1.47 [1.29, 1.69]          | 1.40 [1.17, 1.65]           | 11.9    |  |
| <b>LDL (median [IQR])</b>                                        | 3.50 [2.92, 4.09]           | 3.22 [2.54, 3.81]           | 3.50 [2.92, 4.09]             | 4.6     | 3.46 [2.93, 4.09]           | 3.23 [2.65, 4.02]          | 3.47 [2.94, 4.09]           | 4.2     |  |
| <b>Ever Smoked (%)</b>                                           | 4,132 (41.4)                | 50 (57.5)                   | 4,082 (41.3)                  | 0       | 371 (46.5)                  | 11 (44.0)                  | 360 (46.5)                  | 0       |  |
| <b>MET minutes per week for walking (median [IQR])</b>           | 693.00 [297.00, 1,386.00]   | 528.00 [255.75, 1,608.75]   | 693.00 [297.00, 1,386.00]     | 19.8    | 577.50 [255.75, 1,386.00]   | 478.50 [206.25, 767.25]    | 577.50 [264.00, 1,386.00]   | 21.1    |  |
| <b>MET minutes per week for moderate activity (median [IQR])</b> | 480.00 [120.00, 1,200.00]   | 480.00 [100.00, 1,680.00]   | 480.00 [120.00, 1,200.00]     | 19.8    | 480.00 [120.00, 1,200.00]   | 400.00 [50.00, 795.00]     | 480.00 [120.00, 1,200.00]   | 21.1    |  |
| <b>MET minutes per week for vigorous activity (median [IQR])</b> | 240.00 [0.00, 960.00]       | 0.00 [0.00, 820.00]         | 240.00 [0.00, 960.00]         | 19.8    | 240.00 [0.00, 960.00]       | 40.00 [0.00, 540.00]       | 240.00 [0.00, 960.00]       | 21.1    |  |
| <b>TOT MET minutes per week (median [IQR])</b>                   | 1,773.00 [810.00, 3,452.50] | 1,367.50 [478.50, 3,834.00] | 1,776.50 [810.00, 3,450.00]   | 19.8    | 1,695.00 [783.75, 3,536.00] | 1,050.50 [61.75, 2,846.38] | 1,706.00 [795.00, 3,539.00] | 21.1    |  |
| <b>Family heart disease (%)</b>                                  | 4,458 (44.7)                | 34 (39.1)                   | 4,424 (44.8)                  | 0       | 380 (47.5)                  | 9 (36.0)                   | 371 (47.9)                  | 0       |  |
| <b>CARDIAC DISEASES/OUTCOMES</b>                                 |                             |                             |                               |         |                             |                            |                             |         |  |
| <b>Cardiac problem (%)</b>                                       | 41 (0.4)                    | 2 (2.3)                     | 39 (0.4)                      | 0       | 3 (0.4)                     | 0 (0.0)                    | 3 (0.4)                     | 0       |  |
| <b>Heart failure (%)</b>                                         | 182 (1.8)                   | 74 (85.1)                   | 108 (1.1)                     | 0       | 36 (4.5)                    | 16 (64.0)                  | 20 (2.6)                    | 0       |  |
| <b>Cardiomyopathy (%)</b>                                        | 37 (0.4)                    | 26 (29.9)                   | 11 (0.1)                      | 0       | 22 (2.8)                    | 16 (64.0)                  | 6 (0.8)                     | 0       |  |
| <b>Dilated cardiomyopathy (%)</b>                                | 14 (0.1)                    | 8 (9.2)                     | 6 (0.1)                       | 0       | 9 (1.1)                     | 7 (28.0)                   | 2 (0.3)                     | 0       |  |
| <b>Hypertrophic cardiomyopathy (%)</b>                           | 8 (0.1)                     | 7 (8.0)                     | 1 (0.0)                       | 0       | 7 (0.9)                     | 6 (24.0)                   | 1 (0.1)                     | 0       |  |
| <b>Ventricular arrhythmias (%)</b>                               | 33 (0.3)                    | 3 (3.4)                     | 30 (0.3)                      | 0       | 13 (1.6)                    | 5 (20.0)                   | 8 (1.0)                     | 0       |  |
| <b>Atrial arrhythmias (%)</b>                                    | 191 (1.9)                   | 19 (21.8)                   | 172 (1.7)                     | 0       | 34 (4.2)                    | 6 (24.0)                   | 28 (3.6)                    | 0       |  |
| <b>Heart arrhythmia (%)</b>                                      | 54 (0.5)                    | 2 (2.3)                     | 52 (0.5)                      | 0       | 12 (1.5)                    | 2 (8.0)                    | 10 (1.3)                    | 0       |  |
| <b>Chronic ischemic heart disease (%)</b>                        | 725 (7.3)                   | 0 (0.0)                     | 725 (7.3)                     | 0       | 73 (9.1)                    | 0 (0.0)                    | 73 (9.4)                    | 0       |  |
| <b>Acute myocardial infarction (%)</b>                           | 298 (3.0)                   | 1 (1.1)                     | 297 (3.0)                     | 0       | 27 (3.4)                    | 1 (4.0)                    | 26 (3.4)                    | 0       |  |
| <b>Cardiac arrest (%)</b>                                        | 34 (0.3)                    | 1 (1.1)                     | 33 (0.3)                      | 0       | 6 (0.8)                     | 1 (4.0)                    | 5 (0.6)                     | 0       |  |
| <b>Angina pectoris (%)</b>                                       | 312 (3.1)                   | 2 (2.3)                     | 310 (3.1)                     | 0       | 30 (3.8)                    | 0 (0.0)                    | 30 (3.9)                    | 0       |  |
| <b>Conduction disorders (%)</b>                                  | 151 (1.5)                   | 10 (11.5)                   | 141 (1.4)                     | 0       | 18 (2.2)                    | 3 (12.0)                   | 15 (1.9)                    | 0       |  |
| <b>Valvular disease (%)</b>                                      | 244 (2.4)                   | 23 (26.4)                   | 218 (2.2)                     | 0       | 37 (4.6)                    | 9 (36.0)                   | 28 (3.6)                    | 0       |  |
| <b>Congenital heart disease (%)</b>                              | 28 (0.3)                    | 3 (3.4)                     | 25 (0.3)                      | 0       | 3 (0.4)                     | 1 (4.0)                    | 2 (0.3)                     | 0       |  |
| <b>Pulmonary obstructive disease (%)</b>                         | 494 (5.0)                   | 34 (27.6)                   | 460 (4.8)                     | 0       | 47 (5.9)                    | 7 (28.0)                   | 40 (5.2)                    | 0       |  |
| <b>Cardiovascular death (%)</b>                                  | 181 (1.8)                   | 13 (14.9)                   | 170 (1.7)                     | 0       | 24 (3.0)                    | 5 (20.0)                   | 19 (2.5)                    | 0       |  |
| <b>All-cause mortality (%)</b>                                   | 513 (5.1)                   | 27 (31.0)                   | 486 (4.9)                     | 0       | 56 (7.0)                    | 8 (32.0)                   | 48 (6.2)                    | 0       |  |
| <b>ECG MEASUREMENTS</b>                                          |                             |                             |                               |         |                             |                            |                             |         |  |
| <b>n (%)</b>                                                     | 1,062 (10.6)                | 4 (4.6)                     | 1,058 (10.7)                  | 0       | 87 (10.9)                   | 0 (0.0)                    | 87 (11.2)                   | 0       |  |
| <b>P duration (median [IQR])</b>                                 | 100.00 [90.00, 108.00]      | 90.00 [82.00, 111.00]       | 100.00 [90.00, 108.00]        | 89.8    | 99.00 [86.00, 106.00]       | NA                         | 99.00 [86.00, 106.00]       | 90.0    |  |
| <b>P axis (median [IQR])</b>                                     | 55.00 [40.25, 67.00]        | 47.00 [47.00, 47.00]        | 55.00 [40.00, 67.00]          | 93.1    | 49.00 [36.50, 61.00]        | NA                         | 49.00 [36.50, 61.00]        | 92.6    |  |
| <b>PQ interval (median [IQR])</b>                                | 160.00 [145.50, 178.00]     | 188.00 [188.00, 188.00]     | 160.00 [145.50, 178.00]       | 93.1    | 164.00 [145.00, 176.00]     | NA                         | 164.00 [145.00, 176.00]     | 92.6    |  |
| <b>QRS duration (median [IQR])</b>                               | 86.00 [80.00, 94.00]        | 93.00 [89.50, 97.00]        | 86.00 [80.00, 94.00]          | 89.4    | 84.00 [78.00, 92.00]        | NA                         | 84.00 [78.00, 92.00]        | 89.1    |  |
| <b>R axis (median [IQR])</b>                                     | 34.00 [17.00, 58.00]        | -48.00 [-48.00, -48.00]     | 34.00 [17.50, 58.00]          | 92.9    | 26.00 [-3.50, 50.00]        | NA                         | 26.00 [-3.50, 50.00]        | 92.1    |  |
| <b>QTc interval (median [IQR])</b>                               | 417.00 [402.00, 433.00]     | 511.00 [511.00, 511.00]     | 417.00 [402.00, 433.00]       | 92.9    | 420.00 [404.00, 435.00]     | NA                         | 420.00 [404.00, 435.00]     | 92.1    |  |
| <b>T axis (median [IQR])</b>                                     | 40.00 [23.00, 55.25]        | 92.00 [92.00, 92.00]        | 40.00 [23.00, 55.00]          | 92.9    | 42.00 [25.50, 57.00]        | NA                         | 42.00 [25.50, 57.00]        | 92.1    |  |
| <b>CMR MEASUREMENTS</b>                                          |                             |                             |                               |         |                             |                            |                             |         |  |
| <b>n (%)</b>                                                     | 990 (9.9)                   | 4 (4.6)                     | 986 (10.0)                    | 0       | 87 (10.9)                   | 0 (0.0)                    | 87 (11.2)                   | 0       |  |
| <b>RVEDVI (median [IQR])</b>                                     | 80.18 [70.62, 90.27]        | 79.28 [79.28, 79.28]        | 80.19 [70.61, 90.27]          | 91      | 76.54 [69.50, 84.81]        | NA                         | 76.54 [69.50, 84.81]        | 90.2    |  |
| <b>RVESVI (median [IQR])</b>                                     | 32.89 [27.38, 39.68]        | 20.93 [20.93, 20.93]        | 32.90 [27.42, 39.70]          | 91      | 32.21 [27.10, 37.43]        | NA                         | 32.21 [27.10, 37.43]        | 90.2    |  |
| <b>RVSVI (median [IQR])</b>                                      | 46.55 [40.92, 52.84]        | 58.25 [58.25, 58.25]        | 46.53 [40.91, 52.81]          | 91      | 44.50 [40.74, 51.29]        | NA                         | 44.50 [40.74, 51.29]        | 90.2    |  |
| <b>RVES (median [IQR])</b>                                       | 58.38 [54.19, 62.76]        | 73.60 [73.60, 73.60]        | 58.37 [54.19, 62.74]          | 91      | 59.31 [52.99, 62.99]        | NA                         | 59.31 [52.99, 62.99]        | 90.2    |  |
| <b>RVPER (median [IQR])</b>                                      | 388.72 [316.56, 465.82]     | 446.55 [446.55, 446.55]     | 388.66 [316.54, 465.97]       | 91      | 361.23 [290.07, 443.94]     | NA                         | 361.23 [290.07, 443.94]     | 90.2    |  |
| <b>RVPRF (median [IQR])</b>                                      | 300.61 [245.17, 364.00]     | 373.24 [373.24, 373.24]     | 300.34 [245.12, 363.44]       | 91      | 295.78 [220.42, 343.17]     | NA                         | 295.78 [220.42, 343.17]     | 90.2    |  |
| <b>RVPAFR (median [IQR])</b>                                     | 282.95 [222.68, 360.32]     | 547.72 [547.72, 547.72]     | 282.86 [222.56, 360.07]       | 91      | 275.01 [224.94, 344.91]     | NA                         | 275.01 [224.94, 344.91]     | 90.2    |  |
| <b>LVEDVI (median [IQR])</b>                                     | 74.33 [66.34, 83.11]        | 64.68 [59.39, 69.33]        | 74.37 [66.38, 83.15]          | 91.9    | 77.32 [68.06, 86.15]        | NA                         | 77.32 [68.06, 86.15]        | 91.4    |  |
| <b>LVESVI (median [IQR])</b>                                     | 30.02 [25.12, 35.70]        | 26.43 [25.24, 28.39]        | 30.02 [25.13, 35.72]          | 91.9    | 31.69 [26.19, 39.84]        | NA                         | 31.69 [26.19, 39.84]        | 91.4    |  |
| <b>LVSVI (median [IQR])</b>                                      | 44.03 [39.34, 50.28]        | 38.25 [31.00, 44.09]        | 44.05 [39.37, 50.30]          | 91.9    | 43.18 [37.50, 49.11]        | NA                         | 43.18 [37.50, 49.11]        | 91.4    |  |
| <b>LVFE (median [IQR])</b>                                       | 59.47 [55.29, 63.52]        | 59.14 [51.51, 63.31]        | 59.48 [55.29, 63.52]          | 91.9    | 57.34 [52.60, 62.80]        | NA                         | 57.34 [52.60, 62.80]        | 91.4    |  |
| <b>LVPR (median [IQR])</b>                                       | 373.80 [302.29, 452.71]     | 284.40 [256.83, 364.56]     | 373.81 [302.44, 453.27]       | 91.9    | 339.21 [258.97, 430.85]     | NA                         | 339.21 [258.97, 430.85]     | 91.4    |  |
| <b>LVPAFR (median [IQR])</b>                                     | 321.31 [259.23, 385.16]     | 201.74 [180.85, 239.92]     | 321.49 [259.95, 385.68]       | 91.9    | 314.20 [258.81, 366.77]     | NA                         | 314.20 [258.81, 366.77]     | 91.4    |  |
| <b>LVPEFR (median [IQR])</b>                                     | 233.66 [167.35, 306.30]     | 363.87 [208.97, 466.96]     | 233.50 [167.46, 305.08]       | 91.9    | 253.25 [178.90, 330.96]     | NA                         | 253.25 [178.90, 330.96]     | 91.4    |  |
| <b>LVEDMI (median [IQR])</b>                                     | 0.56 [0.50, 0.62]           | 0.70 [0.56, 0.70]           | 0.56 [0.50, 0.62]             | 91.9    | 0.54 [0.49, 0.59]           | NA                         | 0.54 [0.49, 0.59]           | 91.4    |  |
| <b>LVEDV/RVEDV (median [IQR])</b>                                | 0.93 [0.86, 1.03]           | 0.93 [0.93, 0.93]           | 0.93 [0.86, 1.03]             | 92.2    | 1.00 [0.91, 1.08]           | NA                         | 1.00 [0.91, 1.08]           | 91.8    |  |
| <b>LVESV/RVESV (median [IQR])</b>                                | 0.91 [0.80, 1.04]           | 1.15 [1.15, 1.15]           | 0.91 [0.80, 1.04]             | 92.2    | 1.02 [0.89, 1.19]           | NA                         | 1.02 [0.89, 1.19]           | 91.8    |  |
| <b>peakEcc (median [IQR])</b>                                    | -22.70 [-24.98, -20.43]     | -21.60 [-21.61, -21.59]     | -22.72 [-24.98, -20.42]       | 93.7    | -22.67 [-24.40, -19.13]     | NA                         | -22.67 [-24.40, -19.13]     | 92.8    |  |
| <b>TPKEcc (median [IQR])</b>                                     | 331.31 [309.83, 354.66]     | 325.97 [321.27, 330.67]     | 331.31 [309.75, 354.68]       | 93.7    | 334.71 [320.31, 360.48]     | NA                         | 334.71 [320.31, 360.48]     | 92.8    |  |
| <b>peakEI2Ch (median [IQR])</b>                                  | -21.19 [-23.34, -18.93]     | -23.89 [-23.89, -23.89]     | -21.17 [-23.32, -18.93]       | 93.8    | -20.29 [-22.24, -17.98]     | NA                         | -20.29 [-22.24, -17.98]     | 93      |  |
| <b>TPKEI2Ch (median [IQR])</b>                                   | 349.86 [321.84, 379.10]     | 388.50 [388.50, 388.50]     | 349.86 [321.81, 379.08]       | 93.9    | 353.29 [331.00, 381.68]     | NA                         | 353.29 [331.00, 381.68]     | 93      |  |
| <b>peakEI4Ch (median [IQR])</b>                                  | 23.30 [-25.97, -21.37]      | -21.40 [-21.40, -21.40]     | 23.30 [-25.99, -21.37]        | 93.9    | 22.30 [-24.57, -19.76]      | NA                         | 22.30 [-24.57, -19.76]      | 93      |  |
| <b>TPKEI4Ch (median [IQR])</b>                                   | 357.53 [327.07, 397.64]     | 360.78 [360.78, 360.78]     | 357.30 [326.96, 397.81]       | 93.9    | 354.80 [325.41, 392.55]     | NA                         | 354.80 [325.41, 392.55]     | 93.1    |  |
| <b>Wall thickness segment 1 (median [IQR])</b>                   | 7.65 [6.81, 8.50]           | 7.04 [5.94, 8.14]           | 7.65 [6.81, 8.49]             | 93.2    | 7.44 [6.78, 8.21]           | NA                         | 7.44 [6.78, 8.21]           | 93.4    |  |
| <b>Wall thickness segment 2 (median [IQR])</b>                   | 6.75 [5.75, 7.91]           | 6.75 [6.70, 8.31]           | 6.75 [5.74, 7.90]             | 93.2    | 6.03 [5.31, 7.39]           | NA                         | 6.03 [5.31, 7.39]           | 93.4    |  |
| <b>Wall thickness segment 3 (median [IQR])</b>                   | 6.05 [5.17, 6.96]           | 7.60 [6.78, 8.42]           | 6.05 [5.17, 6.95]             | 93.2    | 6.10 [4.85, 6.66]           | NA                         | 6.10 [4.85, 6.66]           | 93.4    |  |
| <b>Wall thickness segment 4 (median [IQR])</b>                   | 6.54 [5.82, 7.22]           | 8.31 [7.66, 8.97]           | 6.54 [5.81, 7.21]             | 93.2    | 6.57 [5.89, 6.99]           | NA                         | 6.57 [5.89, 6.99]           | 93.4    |  |
| <b>Wall thickness segment 5 (median [IQR])</b>                   | 6.20 [5.62, 6.96]           | 6.33 [5.27, 7.39]           | 6.20 [5.62, 6.96]             | 93.2    | 6.08 [5.57, 6.50]           | NA                         | 6.08 [5.57, 6.50]           | 93.4    |  |
| <b>Wall thickness segment 6 (median [IQR])</b>                   | 6.55 [5.97, 7.31]           | 6.61 [5.42, 7.79]           | 6.55 [5.98, 7.31]             | 93.2    | 6.58 [6.05, 7.01]           | NA                         | 6.58 [6.05, 7.01]           | 93.4    |  |

Supplementary Table III: Extensive baseline table

|                                                                  | Controls G-                 |                             |                               |         |                             | HCM G+                      |                               |         |  |  |
|------------------------------------------------------------------|-----------------------------|-----------------------------|-------------------------------|---------|-----------------------------|-----------------------------|-------------------------------|---------|--|--|
|                                                                  | Overall<br>9,972 (100)      | Diagnosed<br>87 (0.8)       | Non-Diagnosed<br>9,885 (99.2) | Missing | Overall<br>1,346 (100)      | Diagnosed<br>35 (2.6)       | Non-Diagnosed<br>1,311 (97.4) | Missing |  |  |
| <b>n (%)</b>                                                     | 9,972 (100)                 | 87 (0.8)                    | 9,885 (99.2)                  |         | 1,346 (100)                 | 35 (2.6)                    | 1,311 (97.4)                  |         |  |  |
| <b>Sex = Female (%)</b>                                          | 5,436 (54.5)                | 35 (40.2)                   | 5,401 (54.6)                  | 0       | 720 (53.5)                  | 20 (57.1)                   | 700 (53.4)                    | 0       |  |  |
| <b>Age (median [IQR])</b>                                        | 57.00 [49.00, 63.00]        | 62.00 [49.00, 66.00]        | 57.00 [49.00, 63.00]          | 0       | 56.00 [49.00, 63.00]        | 59.00 [51.00, 66.00]        | 56.00 [49.00, 63.00]          | 0       |  |  |
| <b>Ethnicity (%)</b>                                             |                             |                             |                               | 1       |                             |                             |                               | 1.3     |  |  |
| Asian                                                            | 1,076 (10.9)                | 5 (5.8)                     | 1,071 (10.9)                  | 0       | 751 (18.9)                  | 3 (8.6)                     | 748 (19.2)                    | 0       |  |  |
| Black                                                            | 164 (1.7)                   | 3 (3.5)                     | 161 (1.6)                     | 0       | 22 (1.7)                    | 0 (0.0)                     | 22 (1.7)                      | 0       |  |  |
| Chinese                                                          | 56 (0.6)                    | 1 (1.2)                     | 55 (0.6)                      | 0       | 1 (0.1)                     | 0 (0.0)                     | 1 (0.1)                       | 0       |  |  |
| Mixed                                                            | 132 (1.3)                   | 2 (2.3)                     | 130 (1.3)                     | 0       | 28 (2.1)                    | 0 (0.0)                     | 28 (2.2)                      | 0       |  |  |
| Other                                                            | 160 (1.6)                   | 1 (1.2)                     | 159 (1.6)                     | 0       | 26 (2.0)                    | 0 (0.0)                     | 26 (2.0)                      | 0       |  |  |
| White                                                            | 8,288 (83.9)                | 74 (86.0)                   | 8,214 (83.9)                  | 0       | 1,001 (75.3)                | 32 (91.4)                   | 969 (74.9)                    | 0       |  |  |
| <b>CARDIOVASCULAR RISK FACTORS</b>                               |                             |                             |                               |         |                             |                             |                               |         |  |  |
| <b>BMI (median [IQR])</b>                                        | 26.73 [24.15, 29.82]        | 28.83 [25.33, 32.20]        | 26.71 [24.15, 29.80]          | 0.5     | 26.56 [23.88, 29.76]        | 26.54 [23.30, 31.10]        | 26.56 [23.90, 29.72]          | 1       |  |  |
| <b>Diabetes (%)</b>                                              | 914 (9.2)                   | 21 (24.1)                   | 893 (9.0)                     | 0       | 154 (11.4)                  | 4 (11.4)                    | 150 (11.4)                    | 0       |  |  |
| <b>Hypertension (%)</b>                                          | 3,420 (34.3)                | 60 (69.0)                   | 3,360 (34.0)                  | 0       | 475 (35.3)                  | 23 (65.7)                   | 452 (34.5)                    | 0       |  |  |
| <b>Mean systolic blood pressure (median [IQR])</b>               | 135.50 [124.00, 149.00]     | 144.00 [130.00, 155.50]     | 135.50 [124.00, 149.00]       | 0.1     | 135.00 [123.50, 148.50]     | 135.50 [125.00, 154.25]     | 135.00 [123.50, 148.00]       | 0.2     |  |  |
| <b>Mean diastolic blood pressure (median [IQR])</b>              | 82.00 [76.50, 88.50]        | 84.00 [76.50, 91.50]        | 81.50 [75.00, 88.50]          | 0.1     | 81.50 [75.50, 89.00]        | 81.50 [72.50, 91.25]        | 81.50 [75.50, 89.00]          | 0.2     |  |  |
| <b>Hypercholesterolemia (%)</b>                                  | 2,416 (24.2)                | 34 (39.1)                   | 2,382 (24.1)                  | 0       | 369 (27.4)                  | 12 (34.3)                   | 357 (27.2)                    | 0       |  |  |
| <b>Total cholesterol (median [IQR])</b>                          | 5.61 [4.86, 6.38]           | 5.23 [4.39, 6.10]           | 5.61 [4.87, 6.38]             | 4.3     | 5.60 [4.80, 6.38]           | 5.58 [4.73, 6.46]           | 5.60 [4.80, 6.37]             | 4.5     |  |  |
| <b>HDL (median [IQR])</b>                                        | 1.38 [1.16, 1.65]           | 1.29 [1.13, 1.56]           | 1.38 [1.16, 1.65]             | 11.3    | 1.37 [1.14, 1.63]           | 1.32 [1.23, 1.58]           | 1.37 [1.14, 1.63]             | 12.1    |  |  |
| <b>LDL (median [IQR])</b>                                        | 3.50 [2.92, 4.09]           | 3.22 [2.54, 3.81]           | 3.50 [2.92, 4.09]             | 4.6     | 3.48 [2.87, 4.09]           | 3.38 [2.67, 4.43]           | 3.48 [2.88, 4.07]             | 4.8     |  |  |
| <b>Ever Smoked (%)</b>                                           | 4,132 (41.4)                | 50 (57.5)                   | 4,082 (41.3)                  | 0       | 543 (40.3)                  | 12 (34.3)                   | 531 (40.5)                    | 0       |  |  |
| <b>MET minutes per week for walking (median [IQR])</b>           | 693.00 [297.00, 1,386.00]   | 528.00 [255.75, 1,608.75]   | 693.00 [297.00, 1,386.00]     | 19.8    | 693.00 [307.72, 1,386.00]   | 495.00 [198.00, 1,386.00]   | 693.00 [330.00, 1,386.00]     | 19.6    |  |  |
| <b>MET minutes per week for moderate activity (median [IQR])</b> | 480.00 [120.00, 1,200.00]   | 480.00 [100.00, 1,680.00]   | 480.00 [120.00, 1,200.00]     | 19.8    | 480.00 [120.00, 1,200.00]   | 400.00 [160.00, 940.00]     | 480.00 [120.00, 1,200.00]     | 19.6    |  |  |
| <b>MET minutes per week for vigorous activity (median [IQR])</b> | 240.00 [0.00, 960.00]       | 0.00 [0.00, 820.00]         | 240.00 [0.00, 960.00]         | 19.8    | 160.00 [0.00, 930.00]       | 240.00 [0.00, 480.00]       | 160.00 [0.00, 960.00]         | 19.6    |  |  |
| <b>TOTAL MET minutes per week (median [IQR])</b>                 | 1,773.00 [810.00, 3,452.50] | 1,367.50 [478.50, 3,834.00] | 1,775.50 [810.00, 3,450.00]   | 19.8    | 1,762.00 [848.12, 3,490.25] | 1,253.00 [693.00, 3,426.00] | 1,773.00 [855.00, 3,492.00]   | 19.6    |  |  |
| <b>Family heart disease (%)</b>                                  | 4,458 (44.7)                | 34 (39.1)                   | 4,424 (44.8)                  | 0       | 623 (46.3)                  | 15 (42.9)                   | 608 (46.4)                    | 0       |  |  |
| <b>CARDIAC DISEASES/OUTCOMES</b>                                 |                             |                             |                               |         |                             |                             |                               |         |  |  |
| <b>Cardiac problem (%)</b>                                       | 41 (0.4)                    | 2 (2.3)                     | 39 (0.4)                      | 0       | 5 (0.4)                     | 0 (0.0)                     | 5 (0.4)                       | 0       |  |  |
| <b>Heart failure (%)</b>                                         | 182 (1.8)                   | 74 (85.1)                   | 108 (1.1)                     | 0       | 33 (2.5)                    | 15 (42.9)                   | 18 (1.4)                      | 0       |  |  |
| <b>Cardiomyopathy (%)</b>                                        | 37 (0.4)                    | 26 (29.9)                   | 11 (0.1)                      | 0       | 27 (2.0)                    | 21 (60.0)                   | 6 (0.5)                       | 0       |  |  |
| <b>Dilated cardiomyopathy (%)</b>                                | 14 (0.1)                    | 8 (9.2)                     | 6 (0.1)                       | 0       | 1 (0.1)                     | 1 (2.9)                     | 0 (0.0)                       | 0       |  |  |
| <b>Hypertrophic cardiomyopathy (%)</b>                           | 8 (0.1)                     | 7 (8.0)                     | 1 (0.0)                       | 0       | 20 (1.5)                    | 14 (40.0)                   | 6 (0.5)                       | 0       |  |  |
| <b>Ventricular arrhythmias (%)</b>                               | 33 (0.3)                    | 3 (3.4)                     | 30 (0.3)                      | 0       | 8 (0.6)                     | 4 (11.4)                    | 4 (0.3)                       | 0       |  |  |
| <b>Atrial arrhythmias (%)</b>                                    | 191 (1.9)                   | 19 (21.8)                   | 172 (1.7)                     | 0       | 32 (2.4)                    | 6 (17.1)                    | 26 (2.0)                      | 0       |  |  |
| <b>Heart arrhythmia (%)</b>                                      | 54 (0.5)                    | 2 (2.3)                     | 52 (0.5)                      | 0       | 4 (0.3)                     | 0 (0.0)                     | 4 (0.3)                       | 0       |  |  |
| <b>Chronic ischemic heart disease (%)</b>                        | 725 (7.3)                   | 0 (0.0)                     | 725 (7.3)                     | 0       | 93 (6.9)                    | 0 (0.0)                     | 93 (7.1)                      | 0       |  |  |
| <b>Acute myocardial infarction (%)</b>                           | 298 (3.0)                   | 1 (1.1)                     | 297 (3.0)                     | 0       | 36 (2.7)                    | 2 (5.7)                     | 34 (2.6)                      | 0       |  |  |
| <b>Cardiac arrest (%)</b>                                        | 34 (0.3)                    | 1 (1.1)                     | 33 (0.3)                      | 0       | 5 (0.4)                     | 0 (0.0)                     | 5 (0.4)                       | 0       |  |  |
| <b>Angina pectoris (%)</b>                                       | 312 (3.1)                   | 2 (2.3)                     | 310 (3.1)                     | 0       | 56 (4.2)                    | 0 (0.0)                     | 56 (4.3)                      | 0       |  |  |
| <b>Conduction disorders (%)</b>                                  | 151 (1.5)                   | 10 (11.5)                   | 141 (1.4)                     | 0       | 26 (1.9)                    | 6 (17.1)                    | 20 (1.5)                      | 0       |  |  |
| <b>Valvular disease (%)</b>                                      | 244 (2.4)                   | 23 (26.4)                   | 218 (2.2)                     | 0       | 41 (3.0)                    | 8 (22.9)                    | 33 (2.5)                      | 0       |  |  |
| <b>Congenital heart disease (%)</b>                              | 28 (0.3)                    | 3 (3.4)                     | 25 (0.3)                      | 0       | 4 (0.3)                     | 0 (0.0)                     | 4 (0.3)                       | 0       |  |  |
| <b>Pulmonary obstructive disease (%)</b>                         | 494 (5.0)                   | 34 (27.6)                   | 470 (4.8)                     | 0       | 57 (4.2)                    | 4 (11.4)                    | 53 (4.0)                      | 0       |  |  |
| <b>Cardiovascular death (%)</b>                                  | 181 (1.8)                   | 13 (14.9)                   | 167 (1.7)                     | 0       | 18 (1.3)                    | 3 (8.6)                     | 15 (1.1)                      | 0       |  |  |
| <b>All-cause mortality (%)</b>                                   | 513 (5.1)                   | 27 (31.0)                   | 486 (4.9)                     | 0       | 62 (4.6)                    | 6 (17.1)                    | 56 (4.3)                      | 0       |  |  |
| <b>ECG MEASUREMENTS</b>                                          |                             |                             |                               |         |                             |                             |                               |         |  |  |
| <b>n (%)</b>                                                     | 1,062 (10.6)                | 4 (4.6)                     | 1,058 (10.7)                  |         | 138 (10.3)                  | 5 (14.3)                    | 133 (10.1)                    |         |  |  |
| <b>P duration (median [IQR])</b>                                 | 100.00 [90.00, 108.00]      | 90.00 [82.00, 111.00]       | 100.00 [90.00, 108.00]        | 89.8    | 100.00 [90.00, 108.00]      | 100.00 [86.00, 102.00]      | 100.00 [90.00, 108.00]        | 90      |  |  |
| <b>P axis (median [IQR])</b>                                     | 55.00 [40.25, 67.00]        | 47.00 [47.00, 47.00]        | 55.00 [40.00, 67.00]          | 93.1    | 53.00 [36.00, 63.00]        | 70.00 [66.00, 70.00]        | 52.00 [36.00, 62.00]          | 92.9    |  |  |
| <b>PQ interval (median [IQR])</b>                                | 160.00 [145.50, 178.00]     | 188.00 [188.00, 188.00]     | 160.00 [145.00, 178.00]       | 93.1    | 161.00 [147.50, 172.50]     | 180.00 [186.00, 199.00]     | 160.00 [146.00, 172.00]       | 92.9    |  |  |
| <b>QRS duration (median [IQR])</b>                               | 86.00 [80.00, 94.00]        | 93.00 [89.50, 97.00]        | 86.00 [80.00, 94.00]          | 89.4    | 84.00 [80.00, 93.50]        | 100.00 [82.00, 104.00]      | 84.00 [80.00, 92.00]          | 89.7    |  |  |
| <b>R axis (median [IQR])</b>                                     | 34.00 [17.00, 58.00]        | -48.00 [-48.00, -48.00]     | 34.00 [7.50, 58.00]           | 92.9    | 39.00 [10.00, 52.75]        | 2.00 [-17.00, 24.00]        | 39.00 [11.50, 53.50]          | 92.7    |  |  |
| <b>QTc interval (median [IQR])</b>                               | 417.00 [402.00, 433.00]     | 511.00 [511.00, 511.00]     | 417.00 [402.00, 432.50]       | 92.9    | 414.50 [402.00, 429.00]     | 435.00 [428.50, 456.50]     | 414.00 [402.00, 428.50]       | 92.7    |  |  |
| <b>T axis (median [IQR])</b>                                     | 40.00 [23.00, 55.25]        | 90.00 [92.00, 92.00]        | 40.00 [23.00, 55.00]          | 92.9    | 45.00 [31.25, 60.75]        | 49.00 [43.00, 96.00]        | 45.00 [30.50, 60.50]          | 92.7    |  |  |
| <b>CMR MEASUREMENTS</b>                                          |                             |                             |                               |         |                             |                             |                               |         |  |  |
| <b>n (%)</b>                                                     | 990 (9.9)                   | 4 (4.6)                     | 986 (10.0)                    |         | 134 (10.0)                  | 4 (11.4)                    | 130 (9.9)                     |         |  |  |
| <b>RVEDVI (median [IQR])</b>                                     | 80.18 [70.62, 90.27]        | 79.28 [79.28, 79.28]        | 80.19 [70.61, 90.27]          | 91      | 77.30 [67.73, 90.71]        | 79.56 [77.34, 90.20]        | 77.12 [67.27, 90.71]          | 90.4    |  |  |
| <b>RVESVI (median [IQR])</b>                                     | 32.89 [27.38, 39.68]        | 20.93 [20.93, 20.93]        | 32.90 [27.42, 39.70]          | 91      | 31.72 [26.22, 37.33]        | 34.80 [30.85, 43.04]        | 31.40 [26.20, 37.28]          | 90.4    |  |  |
| <b>RVSVI (median [IQR])</b>                                      | 46.55 [40.92, 52.84]        | 58.25 [58.25, 58.25]        | 46.53 [40.91, 52.81]          | 91      | 46.03 [40.64, 54.04]        | 47.41 [45.02, 51.27]        | 45.77 [40.64, 54.04]          | 90.4    |  |  |
| <b>RVFS (median [IQR])</b>                                       | 58.38 [54.19, 62.76]        | 73.60 [73.60, 73.60]        | 58.37 [54.19, 62.74]          | 91      | 56.21 [51.68, 60.89]        | 59.56 [54.80, 63.99]        | 55.56 [54.80, 63.99]          | 90.5    |  |  |
| <b>RVPER (median [IQR])</b>                                      | 388.72 [316.56, 465.82]     | 446.55 [446.55, 446.55]     | 388.66 [316.54, 465.97]       | 91      | 389.50 [310.19, 475.79]     | 391.94 [296.40, 448.92]     | 389.50 [310.19, 475.79]       | 90.4    |  |  |
| <b>RVPRF (median [IQR])</b>                                      | 300.61 [245.17, 364.00]     | 373.24 [373.24, 373.24]     | 300.34 [245.12, 363.44]       | 91      | 285.88 [232.85, 336.38]     | 363.12 [334.18, 386.47]     | 278.68 [230.83, 334.67]       | 90.4    |  |  |
| <b>RVPAFR (median [IQR])</b>                                     | 282.95 [222.68, 360.32]     | 547.72 [547.72, 547.72]     | 282.86 [222.56, 360.07]       | 91      | 299.05 [236.43, 365.16]     | 263.66 [225.50, 297.24]     | 300.15 [236.43, 366.42]       | 90.4    |  |  |
| <b>LVEDVI (median [IQR])</b>                                     | 74.33 [66.34, 83.11]        | 64.68 [59.39, 69.33]        | 74.37 [66.38, 83.15]          | 91.9    | 74.50 [64.57, 84.89]        | 85.13 [83.78, 87.08]        | 72.35 [64.32, 84.59]          | 91.2    |  |  |
| <b>LVESVI (median [IQR])</b>                                     | 30.02 [25.12, 35.70]        | 26.43 [25.24, 28.39]        | 30.02 [25.13, 35.72]          | 91.9    | 30.31 [24.10, 35.20]        | 43.58 [39.30, 47.19]        | 29.37 [24.09, 34.83]          | 91.2    |  |  |
| <b>LVFS (median [IQR])</b>                                       | 44.03 [39.34, 50.28]        | 38.25 [31.00, 44.09]        | 44.05 [39.37, 50.30]          | 91.9    | 44.17 [38.21, 49.98]        | 44.56 [42.26, 45.10]        | 44.07 [38.21, 50.19]          | 91.2    |  |  |
| <b>LVFE (median [IQR])</b>                                       | 59.47 [55.29, 63.52]        | 59.14 [51.51, 63.31]        | 59.48 [55.29, 63.52]          | 91.9    | 59.55 [55.96, 63.53]        | 51.02 [47.77, 53.26]        | 59.73 [56.25, 63.62]          | 91.2    |  |  |
| <b>LVPR (median [IQR])</b>                                       | 378.80 [302.29, 452.71]     | 284.40 [256.83, 364.56]     | 378.31 [302.44, 453.27]       | 91.9    | 340.46 [266.40, 459.49]     | 350.17 [311.46, 380.66]     | 340.46 [264.60, 460.79]       | 91.2    |  |  |
| <b>LVPSF (median [IQR])</b>                                      | 321.31 [259.23, 385.16]     | 201.74 [188.85, 239.92]     | 321.49 [259.95, 385.63]       | 91.9    | 320.26 [252.40, 371.17]     | 315.79 [273.86, 360.98]     | 320.26 [248.52, 371.17]       | 91.2    |  |  |
| <b>LVPAFR (median [IQR])</b>                                     | 233.66 [167.35, 306.30]     | 363.87 [208.97, 466.96]     | 233.50 [167.46, 305.08]       | 91.9    | 241.27 [165.31, 316.89]     | 213.98 [135.78, 272.60]     | 241.27 [167.29, 321.53]       | 91.2    |  |  |
| <b>LVEDMI (median [IQR])</b>                                     | 41.88 [36.52, 48.62]        | 45.76 [34.02, 48.75]        | 41.85 [36.55, 48.61]          | 91.9    | 42.87 [35.12, 49.47]        | 49.63 [46.84, 53.17]        | 42.41 [34.89, 49.27]          | 91.2    |  |  |
| <b>LVPMV (median [IQR])</b>                                      | 0.56 [0.50, 0.62]           | 0.70 [0.56, 0.70]           | 0.56 [0.50, 0.62]             | 91.9    | 0.56 [0.50, 0.64]           | 0.58 [0.55, 0.61]           | 0.56 [0.50, 0.64]             | 91.2    |  |  |
| <b>LVEDV/RVEDV (median [IQR])</b>                                | 0.93 [0.86, 1.03]           | 0.93 [0.93, 0.93]           | 0.93 [0.86, 1.03]             | 92.2    | 0.94 [0.86, 1.03]           | 1.07 [0.99, 1.08]           | 0.94 [0.86, 0.99]             | 91.3    |  |  |
| <b>LVESV/RVESV (median [IQR])</b>                                | 0.91 [0.80, 1.04]           | 1.15 [1.15, 1.15]           | 0.91 [0.80, 1.04]             | 92.2    | 0.90 [0.82, 1.05]           | 1.28 [1.14, 1.30]           | 0.90 [0.82, 1.02]             | 91.3    |  |  |
| <b>peakEcc (median [IQR])</b>                                    | -22.70 [-24.98, -20.43]     | -21.60 [-21.61, -21.59]     | -22.72 [-24.98, -20.42]       | 92.7    | -22.82 [-24.98, -20.60]     | -20.32 [-20.51, -20.27]     | -22.91 [-25.19, -20.88]       | 93.5    |  |  |
| <b>TPKEcc (median [IQR])</b>                                     | 331.31 [309.83, 354.66]     | 325.97 [321.27, 330.67]     | 331.31 [309.75, 354.68]       | 93.7    | 332.34 [308.14, 354.02]     | 347.73 [320.45, 364.22]     | 331.96 [308.15, 353.59]       | 93.5    |  |  |
| <b>peakEII2Ch (median [IQR])</b>                                 | -21.19 [-23.34, -18.93]     | -23.89 [-23.89, -23.89]     | -21.17 [-23.32, -18.93]       | 93.8    | -20.99 [-23.36, -19.01]     | -20.63 [-20.99, -20.19]     | -21.54 [-23.50, -18.88]       | 93.5    |  |  |
| <b>TPKEII2Ch (median [IQR])</b>                                  | 349.86 [321.84, 379.10]     | 388.50 [388.50, 388.50]     | 349.86 [321.81, 379.08]       | 93.9    | 355.54 [320.85, 381.68]     | 403.20 [386.90, 420.81]     | 353.10 [320.40, 379.60]       | 93.5    |  |  |
| <b>peakEII4Ch (median [IQR])</b>                                 | -23.30 [-25.97, -21.37]     | -21.40 [-21.40, -21.40]     | -23.30 [-25.99, -21.37]       | 93.9    | -23.82 [-26.50, -21.90]     | -20.87 [-22.20, -19.79]     | -24.05 [-26.93, -22.28]       | 94.1    |  |  |
| <b>TPKEII4Ch (median [IQR])</b>                                  | 357.53 [327.07, 397.64]     | 360.78 [360.78, 360.78]     | 357.30 [326.96, 397.81]       | 93.9    | 350.13 [318.54, 395.01]     | 403.22 [378.52, 407.61]     | 349.20 [318.54, 390.16]       | 94.1    |  |  |
| <b>Wall thickness segment 1 (median [IQR])</b>                   | 7.65 [6.81, 8.50]           | 7.04 [5.94, 8.14]           | 7.65 [6.81, 8.49]             | 93.2    | 7.59 [6.74, 8.63]           | 9.35 [9.26, 9.44]           | 7.59 [                        |         |  |  |

Supplementary Table III: Extensive baseline table

|                                                                  | Controls G-                 |                             |                               |         |                             | strict HCM G+               |                             |         |  |
|------------------------------------------------------------------|-----------------------------|-----------------------------|-------------------------------|---------|-----------------------------|-----------------------------|-----------------------------|---------|--|
|                                                                  | Overall<br>9,972 (100)      | Diagnosed<br>87 (0.8)       | Non-Diagnosed<br>9,885 (99.2) | Missing | Overall<br>801 (100)        | Diagnosed<br>32 (4.0)       | Non-Diagnosed<br>769 (96.0) | Missing |  |
| <b>Sex = Female (%)</b>                                          | 5,436 (54.5)                | 35 (40.2)                   | 5,401 (54.6)                  | 0       | 445 (55.6)                  | 19 (59.4)                   | 426 (55.4)                  | 0       |  |
| <b>Age (median [IQR])</b>                                        | 57.00 [49.00, 63.00]        | 62.00 [56.00, 66.00]        | 57.00 [49.00, 63.00]          | 0       | 58.00 [50.00, 63.00]        | 58.00 [52.75, 66.00]        | 58.00 [50.00, 63.00]        | 0       |  |
| <b>Ethnicity (%)</b>                                             |                             |                             |                               | 1       |                             |                             |                             | 0.6     |  |
| Asian                                                            | 1,076 (10.9)                | 5 (5.8)                     | 1,071 (10.9)                  | 0       | 14 (1.8)                    | 0 (0.0)                     | 14 (1.8)                    | 0       |  |
| Black                                                            | 164 (1.7)                   | 3 (3.5)                     | 161 (1.6)                     | 0       | 18 (2.3)                    | 0 (0.0)                     | 18 (2.4)                    | 0       |  |
| Chinese                                                          | 56 (0.6)                    | 1 (1.2)                     | 55 (0.6)                      | 0       | 1 (0.1)                     | 0 (0.0)                     | 1 (0.1)                     | 0       |  |
| Mixed                                                            | 132 (1.3)                   | 2 (2.3)                     | 130 (1.3)                     | 0       | 6 (0.8)                     | 0 (0.0)                     | 6 (0.8)                     | 0       |  |
| Other                                                            | 160 (1.6)                   | 1 (1.2)                     | 159 (1.6)                     | 0       | 3 (0.4)                     | 0 (0.0)                     | 3 (0.4)                     | 0       |  |
| White                                                            | 8,288 (83.9)                | 74 (86.0)                   | 8,214 (83.9)                  | 0       | 754 (94.7)                  | 32 (100.0)                  | 722 (94.5)                  | 0       |  |
| <b>CARDIOVASCULAR RISK FACTORS</b>                               |                             |                             |                               |         |                             |                             |                             |         |  |
| <b>BMI (median [IQR])</b>                                        | 26.73 [24.15, 29.82]        | 28.83 [25.33, 32.20]        | 26.71 [24.15, 29.80]          | 0.5     | 26.56 [23.84, 29.85]        | 26.25 [23.37, 30.57]        | 26.58 [23.85, 29.79]        | 0.4     |  |
| <b>Diabetes (%)</b>                                              | 914 (9.2)                   | 21 (24.1)                   | 893 (9.0)                     | 0       | 60 (7.5)                    | 3 (9.4)                     | 57 (7.4)                    | 0       |  |
| <b>Hypertension (%)</b>                                          | 3,420 (34.3)                | 60 (69.0)                   | 3,360 (34.0)                  | 0       | 291 (36.3)                  | 21 (65.6)                   | 270 (35.1)                  | 0       |  |
| <b>Mean systolic blood pressure (median [IQR])</b>               | 135.50 [124.00, 149.00]     | 144.00 [130.00, 155.50]     | 135.50 [124.00, 149.00]       | 0.1     | 136.00 [123.50, 150.50]     | 138.50 [128.12, 156.50]     | 136.00 [123.50, 150.00]     | 0.1     |  |
| <b>Mean diastolic blood pressure (median [IQR])</b>              | 82.00 [75.00, 88.50]        | 84.00 [76.50, 91.50]        | 81.50 [75.00, 88.50]          | 0.1     | 81.50 [75.00, 89.00]        | 83.00 [74.88, 92.12]        | 81.50 [75.00, 89.00]        | 0.1     |  |
| <b>Hypercholesterolemia (%)</b>                                  | 2,416 (24.2)                | 34 (39.1)                   | 2,382 (24.2)                  | 0       | 195 (24.3)                  | 11 (34.4)                   | 184 (23.9)                  | 0       |  |
| <b>Total cholesterol (median [IQR])</b>                          | 5.61 [4.86, 6.38]           | 5.23 [4.39, 6.10]           | 5.61 [4.87, 6.38]             | 4.3     | 5.63 [4.86, 6.42]           | 5.75 [5.03, 6.51]           | 5.63 [4.85, 6.41]           | 4.6     |  |
| <b>HDL (median [IQR])</b>                                        | 1.38 [1.16, 1.65]           | 1.29 [1.13, 1.56]           | 1.38 [1.16, 1.65]             | 11.3    | 1.40 [1.18, 1.68]           | 1.33 [1.24, 1.64]           | 1.40 [1.18, 1.68]           | 13      |  |
| <b>LDL (median [IQR])</b>                                        | 3.50 [2.92, 4.09]           | 3.22 [2.54, 3.81]           | 3.50 [2.92, 4.09]             | 4.6     | 3.50 [2.90, 4.11]           | 3.47 [2.98, 4.46]           | 3.50 [2.90, 4.11]           | 4.9     |  |
| <b>Ever Smoked (%)</b>                                           | 4,132 (41.4)                | 50 (57.5)                   | 4,082 (41.3)                  | 0       | 361 (45.1)                  | 11 (34.4)                   | 350 (45.5)                  | 0       |  |
| <b>MET minutes per week for walking (median [IQR])</b>           | 693.00 [297.00, 1,386.00]   | 528.00 [255.75, 1,608.75]   | 693.00 [297.00, 1,386.00]     | 19.8    | 693.00 [330.00, 1,386.00]   | 495.00 [214.50, 1,386.00]   | 693.00 [330.00, 1,386.00]   | 18      |  |
| <b>MET minutes per week for moderate activity (median [IQR])</b> | 480.00 [120.00, 1,200.00]   | 480.00 [100.00, 1,680.00]   | 480.00 [120.00, 1,200.00]     | 19.8    | 480.00 [160.00, 1,200.00]   | 400.00 [140.00, 900.00]     | 480.00 [160.00, 1,200.00]   | 18      |  |
| <b>MET minutes per week for vigorous activity (median [IQR])</b> | 240.00 [0.00, 960.00]       | 0.00 [0.00, 820.00]         | 240.00 [0.00, 960.00]         | 19.8    | 240.00 [0.00, 960.00]       | 240.00 [0.00, 540.00]       | 240.00 [0.00, 960.00]       | 18      |  |
| <b>TOTAL MET minutes per week (median [IQR])</b>                 | 1,773.00 [810.00, 3,452.50] | 1,367.50 [478.50, 3,834.00] | 1,776.50 [810.00, 3,450.00]   | 19.8    | 1,895.00 [924.00, 3,626.00] | 1,925.50 [711.50, 3,606.00] | 1,942.50 [925.50, 3,622.50] | 18      |  |
| <b>Family heart disease (%)</b>                                  | 4,458 (44.7)                | 34 (39.1)                   | 4,424 (44.8)                  | 0       | 389 (48.6)                  | 14 (43.8)                   | 375 (48.8)                  | 0       |  |
| <b>CARDIAC DISEASES/OUTCOMES</b>                                 |                             |                             |                               |         |                             |                             |                             |         |  |
| <b>Cardiac problem (%)</b>                                       | 41 (0.4)                    | 2 (2.3)                     | 39 (0.4)                      | 0       | 4 (0.5)                     | 0 (0.0)                     | 4 (0.5)                     | 0       |  |
| <b>Heart failure (%)</b>                                         | 182 (1.8)                   | 74 (85.1)                   | 108 (1.1)                     | 0       | 25 (3.1)                    | 13 (40.6)                   | 12 (1.6)                    | 0       |  |
| <b>Cardiomyopathy (%)</b>                                        | 37 (0.4)                    | 26 (29.9)                   | 11 (0.1)                      | 0       | 25 (3.1)                    | 20 (62.5)                   | 5 (0.7)                     | 0       |  |
| <b>Dilated cardiomyopathy (%)</b>                                | 14 (0.1)                    | 8 (9.2)                     | 6 (0.1)                       | 0       | 0 (0.0)                     | 0 (0.0)                     | 0 (0.0)                     | 0       |  |
| <b>Hypertrophic cardiomyopathy (%)</b>                           | 8 (0.1)                     | 7 (8.0)                     | 1 (0.0)                       | 0       | 19 (2.4)                    | 14 (43.8)                   | 5 (0.7)                     | 0       |  |
| <b>Ventricular arrhythmias (%)</b>                               | 33 (0.3)                    | 3 (3.4)                     | 30 (0.3)                      | 0       | 8 (1.0)                     | 4 (12.5)                    | 4 (0.5)                     | 0       |  |
| <b>Atrial arrhythmias (%)</b>                                    | 191 (1.9)                   | 19 (21.8)                   | 172 (1.7)                     | 0       | 25 (3.1)                    | 6 (18.8)                    | 19 (2.5)                    | 0       |  |
| <b>Heart arrhythmia (%)</b>                                      | 54 (0.5)                    | 2 (2.3)                     | 52 (0.5)                      | 0       | 52 (6.5)                    | 0 (0.0)                     | 52 (6.8)                    | 0       |  |
| <b>Chronic ischemic heart disease (%)</b>                        | 725 (7.3)                   | 0 (0.0)                     | 725 (7.3)                     | 0       | 22 (2.7)                    | 2 (6.2)                     | 20 (2.6)                    | 0       |  |
| <b>Acute myocardial infarction (%)</b>                           | 298 (3.0)                   | 1 (1.1)                     | 297 (3.0)                     | 0       | 4 (0.5)                     | 0 (0.0)                     | 4 (0.5)                     | 0       |  |
| <b>Cardiac arrest (%)</b>                                        | 34 (0.3)                    | 1 (1.1)                     | 33 (0.3)                      | 0       | 15 (1.9)                    | 5 (15.6)                    | 10 (1.3)                    | 0       |  |
| <b>Angina pectoris (%)</b>                                       | 312 (3.1)                   | 2 (2.3)                     | 310 (3.1)                     | 0       | 29 (3.6)                    | 8 (25.0)                    | 21 (2.7)                    | 0       |  |
| <b>Conduction disorders (%)</b>                                  | 151 (1.5)                   | 10 (11.5)                   | 141 (1.4)                     | 0       | 3 (0.4)                     | 0 (0.0)                     | 3 (0.4)                     | 0       |  |
| <b>Valvular disease (%)</b>                                      | 244 (2.4)                   | 23 (26.4)                   | 221 (2.2)                     | 0       | 36 (4.5)                    | 3 (9.4)                     | 33 (4.3)                    | 0       |  |
| <b>Congenital heart disease (%)</b>                              | 28 (0.3)                    | 3 (3.4)                     | 25 (0.3)                      | 0       | 3 (0.4)                     | 0 (0.0)                     | 3 (0.4)                     | 0       |  |
| <b>Pulmonary obstructive disease (%)</b>                         | 494 (5.0)                   | 24 (27.6)                   | 470 (4.8)                     | 0       | 32 (4.0)                    | 0 (0.0)                     | 32 (4.2)                    | 0       |  |
| <b>Cardiovascular death (%)</b>                                  | 181 (1.8)                   | 13 (14.9)                   | 168 (1.7)                     | 0       | 10 (1.2)                    | 3 (9.4)                     | 7 (0.9)                     | 0       |  |
| <b>All-cause mortality (%)</b>                                   | 513 (5.1)                   | 27 (31.0)                   | 486 (4.9)                     | 0       | 45 (5.6)                    | 5 (15.6)                    | 40 (5.2)                    | 0       |  |
| <b>ECG MEASUREMENTS</b>                                          |                             |                             |                               |         |                             |                             |                             |         |  |
| <b>n (%)</b>                                                     | 1,062 (10.6)                | 4 (4.6)                     | 1,058 (10.7)                  |         | 85 (10.6)                   | 5 (15.6)                    | 80 (10.4)                   | 0       |  |
| <b>P duration (median [IQR])</b>                                 | 100.00 [90.00, 108.00]      | 90.00 [82.00, 111.00]       | 100.00 [90.00, 108.00]        | 89.8    | 100.00 [90.00, 106.00]      | 100.00 [86.00, 102.00]      | 100.00 [90.50, 106.00]      | 89.6    |  |
| <b>P axis (median [IQR])</b>                                     | 55.00 [40.25, 67.00]        | 47.00 [47.00, 47.00]        | 55.00 [40.00, 67.00]          | 91.1    | 50.00 [36.00, 65.00]        | 70.00 [66.00, 70.00]        | 48.00 [35.75, 64.25]        | 92.1    |  |
| <b>PQ interval (median [IQR])</b>                                | 160.00 [145.50, 178.00]     | 188.00 [188.00, 188.00]     | 160.00 [145.00, 178.00]       | 91.1    | 164.00 [145.00, 174.00]     | 190.00 [186.00, 199.00]     | 163.00 [143.50, 172.00]     | 92.1    |  |
| <b>QRS duration (median [IQR])</b>                               | 86.00 [80.00, 94.00]        | 93.00 [89.50, 97.00]        | 86.00 [80.00, 94.00]          | 89.4    | 86.00 [80.00, 92.00]        | 100.00 [82.00, 104.00]      | 85.00 [80.00, 92.00]        | 89.4    |  |
| <b>R axis (median [IQR])</b>                                     | 34.00 [17.00, 58.00]        | -48.00 [-48.00, -48.00]     | 34.00 [17.00, 58.00]          | 92.9    | 38.50 [19.75, 55.00]        | 2.00 [-17.00, 24.00]        | 39.00 [13.00, 55.00]        | 92.0    |  |
| <b>QTc interval (median [IQR])</b>                               | 417.00 [402.00, 433.00]     | 511.00 [511.00, 511.00]     | 417.00 [402.00, 432.50]       | 92.9    | 415.00 [401.75, 429.25]     | 435.00 [428.50, 456.50]     | 414.00 [401.00, 429.00]     | 92.0    |  |
| <b>T axis (median [IQR])</b>                                     | 40.00 [23.00, 55.25]        | 90.00 [92.00, 92.00]        | 40.00 [23.00, 55.00]          | 92.9    | 45.00 [30.75, 61.25]        | 49.00 [43.00, 95.00]        | 45.00 [30.00, 61.00]        | 92.0    |  |
| <b>CMR MEASUREMENTS</b>                                          |                             |                             |                               |         |                             |                             |                             |         |  |
| <b>n (%)</b>                                                     | 990 (9.9)                   | 4 (4.6)                     | 986 (10.0)                    |         | 84 (10.5)                   | 4 (12.5)                    | 80 (10.4)                   | 0       |  |
| <b>RVEDVi (median [IQR])</b>                                     | 80.18 [70.62, 90.27]        | 79.28 [79.28, 79.28]        | 80.19 [70.61, 90.27]          | 91      | 77.46 [68.84, 93.43]        | 79.56 [77.34, 90.20]        | 77.39 [67.84, 93.43]        | 89.9    |  |
| <b>RVESVi (median [IQR])</b>                                     | 32.89 [27.38, 39.68]        | 20.93 [20.93, 20.93]        | 32.90 [27.42, 39.70]          | 91      | 31.40 [26.87, 37.04]        | 34.80 [30.85, 43.04]        | 31.35 [26.22, 36.21]        | 89.9    |  |
| <b>RVSVi (median [IQR])</b>                                      | 46.55 [40.92, 52.84]        | 58.25 [58.25, 58.25]        | 46.53 [40.91, 52.81]          | 91      | 47.18 [41.46, 55.77]        | 47.18 [45.02, 51.27]        | 47.18 [41.46, 55.77]        | 89.9    |  |
| <b>RVESf (median [IQR])</b>                                      | 58.38 [54.19, 62.76]        | 73.60 [73.60, 73.60]        | 58.37 [54.19, 62.74]          | 91      | 59.99 [56.00, 63.95]        | 56.21 [51.67, 60.89]        | 59.99 [56.46, 64.04]        | 90.0    |  |
| <b>RVPER (median [IQR])</b>                                      | 388.72 [316.56, 465.82]     | 446.55 [446.55, 446.55]     | 388.66 [316.54, 465.97]       | 91      | 398.00 [333.00, 478.60]     | 391.95 [296.40, 448.95]     | 398.00 [333.00, 478.60]     | 89.9    |  |
| <b>RVPAFR (median [IQR])</b>                                     | 300.61 [245.17, 364.00]     | 373.24 [373.24, 373.24]     | 300.34 [245.12, 363.44]       | 91      | 294.17 [243.48, 338.50]     | 363.15 [334.20, 386.48]     | 278.70 [243.13, 334.41]     | 89.9    |  |
| <b>RVPAFRf (median [IQR])</b>                                    | 282.95 [222.68, 360.32]     | 547.72 [547.72, 547.72]     | 282.86 [222.56, 360.07]       | 91      | 302.92 [251.30, 369.30]     | 263.65 [225.50, 297.22]     | 307.70 [254.50, 378.30]     | 89.9    |  |
| <b>LVEDVi (median [IQR])</b>                                     | 74.33 [66.34, 83.11]        | 64.68 [59.39, 69.33]        | 74.37 [66.38, 83.15]          | 91.9    | 78.88 [67.38, 87.06]        | 85.13 [83.78, 87.08]        | 77.40 [66.41, 87.06]        | 90.9    |  |
| <b>LVESVi (median [IQR])</b>                                     | 30.02 [25.12, 35.70]        | 26.43 [25.24, 28.39]        | 30.02 [25.13, 35.72]          | 91.9    | 31.28 [25.63, 37.04]        | 43.58 [39.30, 47.19]        | 31.22 [25.36, 35.84]        | 90.9    |  |
| <b>LVSVi (median [IQR])</b>                                      | 44.03 [39.34, 50.28]        | 38.25 [31.00, 44.09]        | 44.05 [39.37, 50.30]          | 91.9    | 45.49 [39.66, 51.78]        | 44.56 [42.26, 45.10]        | 45.74 [39.66, 52.12]        | 90.9    |  |
| <b>LVVF (median [IQR])</b>                                       | 59.47 [55.29, 63.52]        | 59.14 [51.51, 63.31]        | 59.48 [55.29, 63.52]          | 91.9    | 58.64 [55.31, 62.35]        | 51.02 [47.77, 53.27]        | 58.91 [55.57, 62.38]        | 90.9    |  |
| <b>LVPER (median [IQR])</b>                                      | 378.80 [302.29, 452.71]     | 284.40 [256.83, 364.56]     | 378.81 [302.44, 453.27]       | 91.9    | 351.29 [253.70, 463.30]     | 350.15 [311.48, 380.62]     | 351.29 [253.00, 468.30]     | 90.9    |  |
| <b>LVPAFR (median [IQR])</b>                                     | 321.31 [259.23, 385.16]     | 201.74 [180.85, 239.92]     | 321.40 [259.95, 385.68]       | 91.9    | 336.70 [260.80, 380.00]     | 315.75 [273.82, 360.95]     | 336.70 [259.22, 383.50]     | 90.9    |  |
| <b>LVPAFRf (median [IQR])</b>                                    | 233.66 [167.35, 306.30]     | 363.87 [208.97, 466.86]     | 233.50 [167.46, 305.08]       | 91.9    | 254.63 [181.10, 323.00]     | 213.90 [135.76, 272.58]     | 254.63 [182.20, 323.97]     | 90.9    |  |
| <b>LVEDMf (median [IQR])</b>                                     | 41.88 [36.52, 48.62]        | 45.76 [34.02, 48.75]        | 41.85 [36.55, 48.61]          | 91.9    | 45.21 [37.68, 50.86]        | 49.64 [46.84, 53.17]        | 44.67 [37.47, 49.86]        | 90.9    |  |
| <b>LVVMVf (median [IQR])</b>                                     | 0.56 [0.50, 0.62]           | 0.70 [0.56, 0.70]           | 0.56 [0.50, 0.62]             | 91.9    | 0.57 [0.50, 0.65]           | 0.58 [0.55, 0.61]           | 0.57 [0.50, 0.65]           | 90.9    |  |
| <b>LVEDVf/RVEDVf (median [IQR])</b>                              | 0.93 [0.86, 1.03]           | 0.93 [0.93, 0.93]           | 0.93 [0.86, 1.03]             | 92.2    | 0.95 [0.86, 1.05]           | 1.07 [0.99, 1.08]           | 0.95 [0.86, 1.03]           | 91.9    |  |
| <b>LVESVf/RVESVf (median [IQR])</b>                              | 0.91 [0.80, 1.04]           | 1.15 [1.15, 1.15]           | 0.91 [0.80, 1.04]             | 92.2    | 0.96 [0.86, 1.10]           | 1.27 [1.14, 1.30]           | 0.96 [0.86, 1.09]           | 91.9    |  |
| <b>peakEcc (median [IQR])</b>                                    | -22.70 [-24.98, -20.43]     | -21.60 [-21.61, -21.59]     | -22.72 [-24.98, -20.42]       | 93.7    | -22.59 [-24.30, -20.60]     | -20.32 [-20.51, -20.27]     | -22.78 [-24.41, -20.88]     | 92.1    |  |
| <b>TPKEcc (median [IQR])</b>                                     | 331.31 [309.83, 354.66]     | 325.97 [321.27, 330.67]     | 331.31 [309.75, 354.68]       | 93.7    | 332.34 [309.34, 354.95]     | 347.70 [320.45, 364.20]     | 331.96 [309.94, 354.92]     | 92.1    |  |
| <b>peakEII2Ch (median [IQR])</b>                                 | -21.19 [-23.34, -18.93]     | -23.89 [-23.89, -23.89]     | -21.17 [-23.32, -18.93]       | 93.8    | -20.32 [-22.79, -18.60]     | -20.63 [-20.98, -20.18]     | -20.28 [-22.92, -18.55]     | 92.1    |  |
| <b>TPKEII2Ch (median [IQR])</b>                                  | 349.86 [321.84, 379.10]     | 388.50 [388.50, 388.50]     | 349.86 [321.81, 379.08]       | 93.9    | 364.20 [334.60, 384.50]     | 403.20 [386.90, 420.80]     | 362.52 [333.25, 382.95]     | 92.1    |  |
| <b>peakEII4Ch (median [IQR])</b>                                 | 23.30 [-25.97, -21.37]      | -21.40 [-21.40, -21.40]     | 23.30 [-25.99, -21.37]        | 93.9    | 23.56 [-26.34, -21.77]      | -20.87 [-22.20, -19.78]     | -23.57 [-26.50, -22.22]     | 93.0    |  |
| <b>TPKEII4Ch (median [IQR])</b>                                  | 357.53 [327.07, 397.64]     | 360.78 [360.78, 360.78]     | 357.30 [326.96, 397.81]       | 93.9    | 350.13 [323.33, 395.18]     | 403.25 [378.53, 407.65]     | 348.81 [323.33, 392.97]     | 92.1    |  |
| <b>Wall thickness segment 1 (median [IQR])</b>                   | 7.65 [6.81, 8.50]           | 7.04 [5.94, 8.14]           | 7.65 [6.81, 8.49]             | 93.2    | 8.15 [7.16, 9.17]           | 9.35 [9.26, 9.44]           | 7.93 [6.97, 9.11]           | 94.1    |  |
| <b>Wall thickness segment 2 (median [IQR])</b>                   | 6.75 [5.75, 7.91]           | 6.70 [6.70, 8.31]           | 6.75 [5.74, 7.90]             | 93.2    |                             |                             |                             |         |  |

Supplementary Table IV: Detailed information of all included SNPs

| SNP              | GRCh37               | Gene   | rsID         | Accession ClinVar | Canonical SPDI                       | N ARVC | N DCM | N HCM | MAF      | Origin  | Molecular Consequence | Amino acid change | Nucleotide change  |
|------------------|----------------------|--------|--------------|-------------------|--------------------------------------|--------|-------|-------|----------|---------|-----------------------|-------------------|--------------------|
| 11:47332274:D:25 | 11:47353825          | MYBPC3 | rs36212066   | VCV000177677      | NC_000011.10:47332274:GAGAGGGAGGG    | NA     | NA    | 303   | 7.66E-04 | VKGL    | NA                    | NA                | 3628-41_3628-17del |
| 1:201359245:G:A  | 1:201328373          | TNNT2  | rs121964857  | VCV000012411      | NC_000001.11:201359244:G:A           | NA     | NA    | 242   | 6.03E-04 | VKGL    | Missense              | Arg278Cys         | 862C>T             |
| 11:47342698:G:A  | 11:47364249          | MYBPC3 | rs375882485  | VCV000042540      | NC_000011.10:47342697:G:A            | NA     | NA    | 88    | 2.19E-04 | VKGL    | Missense              | Arg502Trp         | 1504C>T            |
| 12:32802557:G:A  | 12:32955491          | PKP2   | rs193922674  | VCV000006756      | NC_000012.12:32802556:C:G            | 46     | NA    | NA    | 1.15E-04 | ClinVar | Splice acceptor       | NA                | 2014-1G>C          |
| 7:128856810:G:A  | 7:128496864          | FLNC   | rs778922568  | VCV000472173      | NC_000007.14:128856809:G:A           | NA     | 42    | NA    | 1.05E-04 | VKGL    | Missense              | Gly2484Ser        | 7450G>A            |
| 12:32802499:D:5  | 12:32955434_32955438 | PKP2   | rs397517021  | VCV000689321      | NC_000012.12:32802499:GGTGTG:G       | 40     | NA    | NA    | 9.97E-05 | ClinVar | Frameshift            | His689fs          | 2066_2070del       |
| 11:47350077:C:T  | 11:47371628          | MYBPC3 | rs397516050  | VCV000042752      | NC_000011.10:47350076:C:T            | NA     | NA    | 34    | 8.47E-05 | VKGL    | Missense              | Gly148Arg         | 442G>A             |
| 14:23417573:A:G  | 14:23886782          | MYH7   | rs727503244  | VCV000164289      | NC_000014.9:23417572:A:G             | NA     | 34    | 34    | 8.47E-05 | VKGL    | Missense              | Leu1428Ser        | 4283T>C            |
| 2:219425699:C:A  | 2:220290421          | DES    | rs121913005  | VCV000626715      | NC_000002.12:219425698:C:A           | NA     | 31    | NA    | 7.73E-05 | VKGL    | Missense              | Thr442Asn         | 1325C>A            |
| 11:47342574:T:A  | 11:47364125          | MYBPC3 | rs397515916  | VCV000042556      | NC_000011.10:47342573:T:A            | NA     | NA    | 28    | 6.98E-05 | ClinVar | NA                    | NA                | 1624+4A>T          |
| 12:32878134:C:T  | 12:33031068          | PKP2   | rs1085307949 | VCV000427088      | NC_000012.12:32878133:C:T            | 28     | NA    | NA    | 6.98E-05 | VKGL    | Missense              | Ser249Asn         | 746G>A             |
| 11:47343314:C:T  | 11:47364865          | MYBPC3 | NA           | VCV000188544      | NC_000011.10:47343313:C:T            | NA     | NA    | 26    | 6.48E-05 | ClinVar | NA                    | NA                | 1224-52G>A         |
| 14:23414007:C:T  | 14:23883216          | MYH7   | rs753392652  | VCV000378215      | NC_000014.9:23414006:C:T             | NA     | NA    | 24    | 6.23E-05 | ClinVar | Synonymous            | Ala188S=          | 5655G>A            |
| 14:23422292:G:A  | 14:23891501          | MYH7   | rs45611033   | VCV000177753      | NC_000014.9:23422291:G:A             | NA     | 24    | 24    | 5.98E-05 | ClinVar | Missense              | Arg1045Cys        | 3133C>T            |
| 17:41757751:C:A  | 17:39914003          | JUP    | r200327969   | VCV000180376      | NC_000017.11:41757750:C:A            | 24     | NA    | NA    | 5.98E-05 | VKGL    | Missense              | Val603Leu         | 1807G>T            |
| 11:47343117:G:A  | 11:47364668          | MYBPC3 | rs368770848  | VCV000042516      | NC_000011.10:47343116:G:A            | NA     | NA    | 23    | 5.73E-05 | VKGL    | Missense              | Arg419Cys         | 1255C>T            |
| 11:19188286:A:G  | 11:19209833          | CSRP3  | rs104894205  | VCV000008778      | NC_000011.10:19188285:A:G            | NA     | NA    | 21    | 5.23E-05 | VKGL    | Missense              | Leu44Pro          | 131T>C             |
| 11:47342578:C:G  | 11:47364129          | MYBPC3 | rs121909374  | VCV000008608      | NC_000011.10:47342577:C:G            | NA     | NA    | 21    | 5.23E-05 | ClinVar | Missense              | Glu542Gln         | 1624G>C            |
| 11:47346276:C:T  | 11:47367827          | MYBPC3 | rs397515881  | VCV000042499      | NC_000011.10:47346275:C:T            | NA     | NA    | 20    | 4.98E-05 | VKGL    | Missense              | Gly341Ser         | 1021G>A            |
| 2:178528273:C:T  | 2:179393000          | TTN    | rs112188483  | VCV000196723      | NC_000002.12:178528272:C:T           | NA     | 20    | NA    | 4.98E-05 | ClinVar | Splice donor          | NA                | 107377+1G>A        |
| 14:23428957:C:T  | 14:23898166          | MYH7   | rs397516106  | VCV000177921      | NC_000014.9:23428956:C:T             | NA     | NA    | 19    | 4.74E-05 | VKGL    | Missense              | Asp469Asn         | 1405G>A            |
| 3:38550326:C:T   | 3:38591817           | SCN5A  | rs762981322  | VCV000201549      | NC_000003.12:38550325:C:T            | NA     | 19    | NA    | 4.74E-05 | VKGL    | Missense              | Val2015Met        | 6043G>A            |
| 12:32896580:D:4  | 12:33049514          | PKP2   | rs397516997  | VCV000045028      | NC_000012.12:32896580:CTGCTG:CTG     | 18     | NA    | NA    | 4.49E-05 | VKGL    | Frameshift            | Thr50fs           | 148_151del         |
| 11:47351507:T:C  | 11:47373058          | MYBPC3 | rs376395543  | VCV000042644      | NC_000011.10:47351506:T:C            | NA     | NA    | 17    | 4.24E-05 | ClinVar | Splice acceptor       | NA                | 26-2A>G            |
| 2:178579702:G:A  | 2:17944429           | TTN    | rs574660186  | VCV000180573      | NC_000002.12:178579701:G:A           | NA     | 17    | NA    | 4.24E-05 | ClinVar | Nonsense              | Arg22499Ter       | 67495C>T           |
| 11:47337534:C:T  | 11:47359085          | MYBPC3 | rs2856655    | VCV000008617      | NC_000011.10:47337533:C:T            | NA     | NA    | 16    | 3.99E-05 | ClinVar | Missense              | Arg820Gln         | 2459G>A            |
| 18:31089461:C:T  | 18:28669424          | DSC2   | rs758527425  | VCV000372720      | NC_000018.10:31089460:C:T            | 15     | NA    | NA    | 3.74E-05 | VKGL    | Missense              | Arg203His         | 608G>A             |
| 2:178613938:C:T  | 2:179478665          | TTN    | rs869312070  | VCV000223309      | NC_000002.12:178613937:C:T           | NA     | 15    | NA    | 3.74E-05 | ClinVar | Splice acceptor       | NA                | 22151-1G>A         |
| 14:23427746:T:C  | 14:23896955          | MYH7   | rs727504238  | VCV000177625      | NC_000014.9:23427745:T:C             | NA     | 14    | 14    | 3.49E-05 | ClinVar | Missense              | His576Arg         | 1727A>G            |
| 1:156135268:C:T  | 1:156105059          | LMNA   | rs59885338   | VCV000014498      | NC_000001.11:156135267:C:T           | NA     | 13    | NA    | 3.24E-05 | VKGL    | Missense              | Arg298Cys         | 892C>T             |
| 11:47337729:I:1  | 11:47359280          | MYBPC3 | rs397515963  | VCV000042619      | NC_000011.10:47337728:C:CC           | NA     | NA    | 13    | 3.24E-05 | ClinVar | Frameshift            | Trp792fs          | 2373dup            |
| 14:23425316:C:T  | 14:23894525          | MYH7   | rs3218716    | VCV000042901      | NC_000014.9:23425315:C:T             | NA     | 13    | 13    | 3.24E-05 | ClinVar | Missense              | Ala797Thr         | 2389G>A            |
| 18:31087815:T:C  | 18:28667778          | DSC2   | rs397514042  | VCV000016850      | NC_000018.10:31087814:T:C            | 13     | NA    | NA    | 3.24E-05 | VKGL    | Splice acceptor       | NA                | 631-2A>G           |
| 19:55154821:G:A  | 19:55666189          | TNNI3  | rs730881068  | VCV000181575      | NC_000019.10:55154820:G:A            | NA     | 13    | 13    | 3.24E-05 | VKGL    | Nonsense              | Arg98Ter          | 292C>T             |
| 19:55154094:C:T  | 19:55665462          | TNNI3  | rs397516354  | VCV000043389      | NC_000019.10:55154093:C:A            | NA     | 12    | 12    | 2.99E-05 | ClinVar | Missense              | Arg162Gln         | 485G>A             |
| 3:38562422:C:A   | 3:38603913           | SCN5A  | rs199473220  | VCV000067838      | NC_000003.12:38562421:C:A            | NA     | 12    | NA    | 2.99E-05 | ClinVar | Missense              | Gly1318Val        | 3953G>T            |
| 10:119669881:C:T | 10:121429393         | BAG3   | rs387906874  | VCV000030396      | NC_000010.11:119669880:C:T           | NA     | 11    | NA    | 2.74E-05 | VKGL    | Missense              | Arg71Trp          | 211C>T             |
| 2:178777234:D:5  | 2:179641961          | TTN    | rs756433029  | VCV000202501      | NC_000002.12:178777234:TTTCATTCA:TT  | NA     | 11    | NA    | 2.74E-05 | VKGL    | Frameshift            | Met1575fs         | 4724_4728del       |
| 1:156134823:C:T  | 1:156104614          | LMNA   | rs370134870  | VCV000264626      | NC_000001.11:156134822:C:T           | NA     | 10    | NA    | 2.49E-05 | VKGL    | Missense              | Arg220Cys         | 658C>T             |
| 11:47342718:C:T  | 11:47364269          | MYBPC3 | rs200411226  | VCV000164113      | NC_000011.10:47342717:C:T            | NA     | NA    | 10    | 2.49E-05 | ClinVar | Missense              | Arg495Gln         | 1484G>A            |
| 11:47348541:C:G  | 11:47370092          | MYBPC3 | rs397516068  | VCV000042784      | NC_000011.10:47348540:C:G            | NA     | NA    | 10    | 2.49E-05 | ClinVar | Missense              | Val219Leu         | 655G>C             |
| 2:178620285:G:A  | 2:179485012          | TTN    | rs368200299  | VCV000223308      | NC_000002.12:178620284:G:T           | NA     | 10    | NA    | 2.49E-05 | ClinVar | Nonsense              | Cys15412Ter       | 46236C>A           |
| 3:38613773:G:A   | 3:38655264           | SCN5A  | rs199473072  | VCV000068032      | NC_000003.12:38613772:G:A            | NA     | 10    | NA    | 2.49E-05 | ClinVar | Missense              | Arg225Trp         | 673C>T             |
| 6:7585760:C:G    | 6:7585993            | DSP    | NA           | VCV000924608      | NC_000006.12:7585759:C:G             | NA     | 10    | NA    | 2.49E-05 | VKGL    | Missense              | Ser2833Cys        | 8498C>G            |
| 11:47342854:G:A  | 11:47364405          | MYBPC3 | rs730880540  | VCV000180935      | NC_000011.10:47342853:G:A            | NA     | NA    | 9     | 2.24E-05 | VKGL    | Missense              | Ser478Leu         | 1433C>T            |
| 11:47348424:C:T  | 11:47369975          | MYBPC3 | rs397516074  | VCV000042792      | NC_000011.10:47348423:C:T            | NA     | NA    | 9     | 2.24E-05 | ClinVar | Missense              | Glu258Lys         | 772G>A             |
| 12:110913140:G:A | 12:111350944         | MYL2   | rs397516404  | VCV000043471      | NC_000012.12:110913139:G:A           | NA     | NA    | 9     | 2.24E-05 | VKGL    | Missense              | Arg120Trp         | 358C>T             |
| 19:55154095:G:A  | 19:55665463          | TNNI3  | rs368861241  | VCV0000161396     | NC_000019.10:55154094:G:A            | NA     | NA    | 9     | 2.24E-05 | ClinVar | Missense              | Arg162Trp         | 484C>T             |
| 2:178534401:A:G  | 2:179399128          | TTN    | rs375159973  | VCV000405075      | NC_000002.12:178534400:A:G           | NA     | 9     | NA    | 2.24E-05 | VKGL    | Missense              | Trp34072Arg       | 102214T>C          |
| 2:178579850:T:G  | 2:179444577          | TTN    | rs753948675  | VCV000242425      | NC_000002.12:178579849:T:G           | NA     | 9     | NA    | 2.24E-05 | ClinVar | Splice acceptor       | NA                | 67349-2A>C         |
| 1:156135956:G:A  | 1:156105747          | LMNA   | rs59301204   | VCV000048098      | NC_000001.11:156135955:G:A           | NA     | 8     | NA    | 1.99E-05 | VKGL    | Missense              | Arg331Gln         | 992G>A             |
| 1:201364327:G:A  | 1:201333455          | TNNT2  | rs483352832  | VCV000132943      | NC_000001.11:201364326:G:A           | NA     | 8     | 7     | 1.99E-05 | VKGL    | Missense              | Arg154Trp         | 460C>T             |
| 1:201365620:D:2  | 1:201334748          | TNNT2  | NA           | VCV000925600      | NC_000001.11:201365620:CTCTCTCTC:CTC | NA     | 8     | 8     | 1.99E-05 | VKGL    | Frameshift            | Arg94fs           | 282_283del         |
| 11:47342719:G:C  | 11:47364270          | MYBPC3 | rs397515905  | VCV000042537      | NC_000011.10:47342718:G:C            | NA     | NA    | 8     | 1.99E-05 | ClinVar | Missense              | Arg495Gly         | 1483C>G            |
| 12:110919133:C:T | 12:111356937         | MYL2   | rs104894368  | VCV000014065      | NC_000012.12:110919132:C:T           | NA     | NA    | 8     | 1.99E-05 | ClinVar | Missense              | Glu22Lys          | 64G>A              |
| 12:32878545:T:A  | 12:33031479          | PKP2   | rs786204389  | VCV000188654      | NC_000012.12:32878544:T:A            | 8      | NA    | NA    | 1.99E-05 | ClinVar | Splice acceptor       | NA                | 337-2A>T           |
| 2:178531668:G:A  | 2:179396395          | TTN    | rs991187915  | VCV00067024       | NC_000002.12:178531667:G:A           | NA     | 8     | NA    | 1.99E-05 | ClinVar | Nonsense              | Gln34983Ter       | 104947C>T          |
| 3:38551513:G:A   | 3:38593004           | SCN5A  | rs199473282  | VCV000067932      | NC_000003.12:38551512:G:A            | NA     | 8     | NA    | 1.99E-05 | ClinVar | Missense              | Thr1619Met        | 4856C>T            |
| 3:52453993:G:A   | 3:52488009           | TNNC1  | rs267607125  | VCV000012443      | NC_000003.12:52453992:G:A            | NA     | 7     | 7     | 1.75E-05 | ClinVar | Missense              | Ala8Val           | 23C>T              |

| SNP              | GRCh37               | Gene   | rsID         | Accession ClinVar | Canonical SPDI                      | N ARVC | N DCM | N HCM | MAF      | Origin  | Molecular Consequence | Amino acid change | Nucleotide change |
|------------------|----------------------|--------|--------------|-------------------|-------------------------------------|--------|-------|-------|----------|---------|-----------------------|-------------------|-------------------|
| 11:47346379:C:T  | 11:47367930          | MYBPC3 | rs397516083  | VCV000042807      | NC_000011.10:47346378:C:T           | NA     | NA    | 7     | 1.74E-05 | ClinVar | NA                    | NA                | 927-9G>A          |
| 2:178562716:G:A  | 2:179427443          | TTN    | NA           | VCV000864799      | NC_000002.12:178562715:G:A          | NA     | 7     | NA    | 1.74E-05 | ClinVar | Nonsense              | Arg27806Ter       | 83416C>T          |
| 1:236727715:C:T  | 1:236891015          | ACTN2  | rs1253211384 | VCV000660714      | NC_000001.11:236727714:C:T          | NA     | 6     | NA    | 1.50E-05 | VKGL    | Nonsense              | Arg192Ter         | 574C>T            |
| 11:47339792:T:C  | 11:47361343          | MYBPC3 | rs397515937  | VCV000042585      | NC_000011.10:47339791:T:C           | NA     | NA    | 6     | 1.50E-05 | ClinVar | Splice acceptor       | NA                | 1928-2A>G         |
| 12:32796108:C:A  | 12:32949042          | PKP2   | rs111517471  | VCV00006757       | NC_000012.12:32796107:C:T           | 6      | NA    | NA    | 1.50E-05 | ClinVar | Splice donor          | NA                | 2357+1G>A         |
| 12:32822616:1:1  | 12:32975550-32975551 | PKP2   | rs397517010  | VCV000045047      | NC_000012.12:32822616:A:AA          | 6      | NA    | NA    | 1.50E-05 | ClinVar | Frameshift            | Val564fs          | 1689dup           |
| 12:32878981:A:T  | 12:33031915          | PKP2   | rs763639737  | VCV000202026      | NC_000012.12:32878980:A:T           | 6      | NA    | NA    | 1.50E-05 | ClinVar | Nonsense              | Leu92Ter          | 275T>A            |
| 14:23416057:G:A  | 14:23885266          | MYH7   | rs397516232  | VCV000043043      | NC_000014.9:23416056:G:A            | NA     | NA    | 6     | 1.50E-05 | VKGL    | Missense              | Arg1634Cys        | 4900C>T           |
| 14:23424840:G:A  | 14:23894049          | MYH7   | rs138049878  | VCV000161326      | NC_000014.9:23424839:G:A            | NA     | 6     | 6     | 1.50E-05 | ClinVar | Missense              | Arg870Cys         | 2608C>T           |
| 14:23428631:C:T  | 14:23897840          | MYH7   | rs121913651  | VCV000014119      | NC_000014.9:23428630:C:T            | NA     | NA    | 6     | 1.50E-05 | VKGL    | Missense              | Glu483Lys         | 1447G>A           |
| 18:31070724:A:G  | 18:28650690          | DSC2   | rs1064793731 | VCV0000419220     | NC_000018.10:31070723:A:G           | 6      | NA    | NA    | 1.50E-05 | ClinVar | Splice donor          | NA                | 2250+2T>C         |
| 2:178582209:C:G  | 2:179446936          | TTN    | rs1553627403 | VCV000466651      | NC_000002.12:178582208:C:G          | NA     | 6     | NA    | 1.50E-05 | ClinVar | Splice acceptor       | NA                | 66161-1G>C        |
| 2:178684990:C:T  | 2:179549717          | TTN    | rs371725574  | VCV000194146      | NC_000002.12:178684989:C:T          | NA     | 6     | NA    | 1.50E-05 | VKGL    | Splice acceptor       | NA                | 32471-1G>A        |
| 20:44160293:G:A  | 20:42788933          | JPH2   | rs387906898  | VCV000030457      | NC_000020.11:44160292:G:A           | NA     | NA    | 6     | 1.50E-05 | ClinVar | Missense              | Ser165Phe         | 494C>T            |
| 11:19188281:T:G  | 11:19209828          | CSRP3  | rs137852765  | VCV000008781      | NC_000011.10:19188280:T:G           | NA     | NA    | 5     | 1.25E-05 | VKGL    | Missense              | Ser46Arg          | 136A>C            |
| 11:47333189:C:G  | 11:47354740          | MYBPC3 | rs373746463  | VCV000042707      | NC_000011.10:47333188:C:G           | NA     | NA    | 5     | 1.25E-05 | ClinVar | NA                    | NA                | 3330+5G>T         |
| 11:47341219:C:T  | 11:47362770          | MYBPC3 | rs368482358  | VCV000180951      | NC_000011.10:47341218:C:T           | NA     | NA    | 5     | 1.25E-05 | VKGL    | Missense              | Val60Ile          | 1816G>A           |
| 11:47341991:C:T  | 11:47363542          | MYBPC3 | rs727503195  | VCV000164098      | NC_000011.10:47341990:C:T           | NA     | NA    | 5     | 1.25E-05 | VKGL    | Missense              | Arg597Gln         | 1790G>A           |
| 11:47342611:C:G  | 11:47364162          | MYBPC3 | rs397515912  | VCV000042550      | NC_000011.10:47342610:C:G           | NA     | NA    | 5     | 1.25E-05 | ClinVar | Missense              | Gly531Arg         | 1591G>C           |
| 14:23417598:G:A  | 14:23886807          | MYH7   | rs145213771  | VCV000043003      | NC_000014.9:23417597:G:A            | NA     | 5     | 5     | 1.25E-05 | ClinVar | Missense              | Arg1420Trp        | 4258C>T           |
| 14:23418304:G:A  | 14:23887513          | MYH7   | rs45451303   | VCV000178082      | NC_000014.9:23418303:G:A            | NA     | 5     | 5     | 1.25E-05 | VKGL    | Missense              | Arg1359Cys        | 4075C>T           |
| 14:23424112:T:C  | 14:23893321          | MYH7   | rs267606908  | VCV000014125      | NC_000014.9:23424111:T:C            | NA     | 5     | 5     | 1.25E-05 | ClinVar | Missense              | Asp906Gly         | 2717A>G           |
| 14:23429037:C:T  | 14:23898246          | MYH7   | rs730880870  | VCV000181342      | NC_000014.9:23429036:C:T            | NA     | 5     | 5     | 1.25E-05 | VKGL    | Missense              | Arg442His         | 1325G>A           |
| 19:55156638:1:1  | 19:55668006          | TNNI3  | rs772607683  | VCV000419596      | NC_000019.10:55156638:TTTTTT:TTTTTT | NA     | 5     | 5     | 1.25E-05 | VKGL    | Frameshift            | Ser39fs           | 114dup            |
| 2:178560865:G:A  | 2:179425592          | TTN    | NA           | VCV000853671      | NC_000002.12:178560864:G:A          | NA     | 5     | NA    | 1.25E-05 | ClinVar | Nonsense              | Arg28423Ter       | 85267C>T          |
| 2:178574530:G:A  | 2:179439257          | TTN    | rs397517689  | VCV000047301      | NC_000002.12:178574529:G:A          | NA     | 5     | NA    | 1.25E-05 | ClinVar | Nonsense              | Arg23868Ter       | 71602C>T          |
| 2:178589849:G:A  | 2:179454576          | TTN    | rs72646846   | VCV000047175      | NC_000002.12:178589848:G:A          | NA     | 5     | NA    | 1.25E-05 | ClinVar | Nonsense              | Arg20626Ter       | 61876C>T          |
| 2:178767782:G:A  | 2:179632509          | TTN    | rs146572907  | VCV000282852      | NC_000002.12:178767781:G:A          | NA     | 5     | NA    | 1.25E-05 | VKGL    | Nonsense              | Arg3150Ter        | 9448C>T           |
| 2:219423821:G:A  | 2:220288543          | DES    | rs112224037  | VCV000639517      | NC_000002.12:219423820:G:A          | 5      | 5     | NA    | 1.25E-05 | ClinVar | Splice donor          | NA                | 1288+1G>A         |
| 6:7569211:G:A    | 6:7569444            | DSP    | NA           | VCV000956247      | NC_000006.12:7569210:G:A            | 5      | 5     | NA    | 1.25E-05 | VKGL    | Missense              | Cys482Tyr         | 1445G>A           |
| 6:7579922:1:7    | 6:7580155-7580156    | DSP    | rs1554108152 | VCV000199923      | NC_000006.12:7579922:GAAATCGA:GAA   | 5      | NA    | NA    | 1.25E-05 | ClinVar | Frameshift            | Asp1248fs         | 3735_3741dup      |
| 1:156134454:C:T  | 1:156104245          | LMNA   | rs267607626  | VCV000066906      | NC_000001.11:156134453:C:T          | NA     | 4     | NA    | 9.97E-06 | VKGL    | Missense              | Arg189Trp         | 565C>T            |
| 1:156136311:C:T  | 1:156106102          | LMNA   | rs1064793731 | VCV000242002      | NC_000001.11:156136310:C:T          | NA     | 4     | NA    | 9.97E-06 | VKGL    | Missense              | Arg419Cys         | 1255C>T           |
| 1:201361317:A:C  | 1:201330445          | TNNI2  | rs730881110  | VCV000181645      | NC_000001.11:201361316:A:C          | NA     | 4     | 4     | 9.97E-06 | VKGL    | Missense              | Phe258Val         | 772T>G            |
| 10:110812459:C:T | 10:112572217         | RBM20  | rs794729150  | VCV000202065      | NC_000010.11:110812458:C:T          | NA     | 4     | NA    | 9.97E-06 | VKGL    | Nonsense              | Arg688Ter         | 2062C>T           |
| 11:47337544:G:A  | 11:47359095          | MYBPC3 | rs727503188  | VCV000164078      | NC_000011.10:47337543:G:A           | NA     | NA    | 4     | 9.97E-06 | ClinVar | Missense              | Arg817Trp         | 2449C>T           |
| 11:47342750:C:T  | 11:47364301          | MYBPC3 | rs375347534  | VCV000042533      | NC_000011.10:47342749:C:T           | NA     | NA    | 4     | 9.97E-06 | VKGL    | Na                    | NA                | 1458-6G>A         |
| 12:110911176:C:G | 12:111348980         | MYL2   | rs199474813  | VCV000031768      | NC_000012.12:110911175:C:G          | NA     | NA    | 4     | 9.97E-06 | ClinVar | Splice acceptor       | NA                | 403-1G>C          |
| 12:32878217:G:T  | 12:33031151          | PKP2   | rs767987619  | VCV000201976      | NC_000012.12:32878216:G:T           | 4      | NA    | NA    | 9.97E-06 | ClinVar | Nonsense              | Tyr221Ter         | 663C>A            |
| 14:23415651:C:T  | 14:23884860          | MYH7   | rs193922390  | VCV000036642      | NC_000014.9:23415650:C:T            | NA     | 4     | NA    | 9.97E-06 | ClinVar | Missense              | Arg1712Gln        | 5135G>A           |
| 14:23418348:C:T  | 14:23887557          | MYH7   | rs797045097  | VCV000208597      | NC_000014.9:23418347:C:T            | NA     | NA    | 4     | 9.97E-06 | VKGL    | Missense              | Arg1344Gln        | 4031G>A           |
| 14:23424876:G:A  | 14:23894085          | MYH7   | rs2754158    | VCV000164324      | NC_000014.9:23424875:G:A            | NA     | 4     | 4     | 9.97E-06 | ClinVar | Missense              | Arg858Cys         | 2572C>T           |
| 18:31086694:G:A  | 18:28666657          | DSC2   | rs397517404  | VCV00022557       | NC_000018.10:31086693:G:A           | 4      | NA    | NA    | 9.97E-06 | VKGL    | Missense              | Thr275Met         | 824C>T            |
| 18:31498254:G:A  | 18:29078217          | DSG2   | rs1021457619 | VCV000657863      | NC_000018.10:31498253:G:A           | 4      | NA    | NA    | 9.97E-06 | ClinVar | Missense              | Met1Ile           | 3G>A              |
| 19:55151881:C:T  | 19:55663249          | TNNI3  | rs104894727  | VCV000012422      | NC_000019.10:55151880:C:T           | NA     | NA    | 4     | 9.97E-06 | ClinVar | Missense              | Asp196Asn         | 586G>A            |
| 2:178539559:G:A  | 2:179404286          | TTN    | rs869312085  | VCV000223239      | NC_000002.12:178539558:G:A          | NA     | 4     | NA    | 9.97E-06 | ClinVar | Nonsense              | Arg32836Ter       | 98506C>T          |
| 2:178584726:G:A  | 2:179449453          | TTN    | rs1432889079 | VCV000466649      | NC_000002.12:178584725:G:A          | NA     | 4     | NA    | 9.97E-06 | ClinVar | Nonsense              | Arg21639Ter       | 64915C>T          |
| 2:178590170:G:A  | 2:179454897          | TTN    | NA           | VCV000202397      | NC_000002.12:178590169:G:A          | NA     | 4     | NA    | 9.97E-06 | ClinVar | Nonsense              | Arg20519Ter       | 61555C>T          |
| 2:219418784:G:T  | 2:220283506          | DES    | rs62636490   | VCV000804737      | NC_000002.12:219418783:G:T          | 4      | 4     | NA    | 9.97E-06 | ClinVar | Nonsense              | Glu108Ter         | 322G>T            |
| 3:38597737:C:T   | 3:38639228           | SCN5A  | rs199473153  | VCV000067723      | NC_000003.12:38597736:C:T           | NA     | 4     | NA    | 9.97E-06 | ClinVar | Missense              | Gly752Arg         | 2254G>A           |
| 3:38603999:G:A   | 3:38645490           | SCN5A  | rs1417036453 | VCV000517279      | NC_000003.12:38603998:G:A           | NA     | 4     | NA    | 9.97E-06 | ClinVar | Nonsense              | Arg535Ter         | 1603C>T           |
| 6:118558947:G:A  | 6:118880110          | PLN    | rs754782171  | VCV000202037      | NC_000006.12:118558946:G:A          | NA     | 4     | NA    | 9.97E-06 | VKGL    | Missense              | Arg9His           | 26G>A             |
| 6:7565521:G:A    | 6:7565754            | DSP    | rs727504443  | VCV000178282      | NC_000006.12:7565520:G:A            | 4      | 4     | NA    | 9.97E-06 | ClinVar | Splice donor          | NA                | 939+1G>A          |
| 6:7583758:C:T    | 6:7583991            | DSP    | rs141026028  | VCV000199903      | NC_000006.12:7583757:C:T            | 4      | 4     | NA    | 9.97E-06 | ClinVar | Nonsense              | Arg2166Ter        | 6496C>T           |
| 6:7585028:D:4    | 6:7585261            | DSP    | NA           | VCV000923199      | NC_000006.12:7585028:AGTAAGTAAG:AG  | 4      | NA    | NA    | 9.97E-06 | VKGL    | Frameshift            | Ser2591fs         | 7773_7776del      |
| 12:32843181:C:T  | 12:32996115          | PKP2   | rs1332615728 | VCV000640418      | NC_000012.12:32843180:C:T           | 3      | NA    | NA    | 7.50E-06 | ClinVar | Splice donor          | NA                | 1379-1976G>A      |
| 1:201359636:C:T  | 1:201328764          | TNNI2  | rs121964861  | VCV000012417      | NC_000001.11:201359635:C:T          | NA     | 3     | NA    | 7.48E-06 | ClinVar | Missense              | Asp280Asn         | 838G>A            |
| 1:201361970:A:G  | 1:201331098          | TNNI2  | rs863225120  | VCV000217496      | NC_000001.11:201361969:A:G          | NA     | NA    | 3     | 7.48E-06 | ClinVar | Missense              | Ile221Thr         | 662T>C            |
| 11:47332075:G:A  | 11:47353626          | MYBPC3 | rs397516042  | VCV000042744      | NC_000011.10:47332074:G:A           | NA     | NA    | 3     | 7.48E-06 | ClinVar | Nonsense              | Arg1271Ter        | 3811C>T           |
| 11:47341204:C:T  | 11:47362755          | MYBPC3 | rs397515937  | VCV000180955      | NC_000011.10:47341203:C:T           | NA     | NA    | 3     | 7.48E-06 | VKGL    | Missense              | Glu611Lys         | 1831G>A           |

| SNP              | GRCh37               | Gene   | rsID         | Accession ClinVar | Canonical SPDI                      | N ARVC | N DCM | N HCM | MAF      | Origin  | Molecular Consequence | Amino acid change | Nucleotide change |
|------------------|----------------------|--------|--------------|-------------------|-------------------------------------|--------|-------|-------|----------|---------|-----------------------|-------------------|-------------------|
| 11:47342611:C:T  | 11:47364162          | MYBPC3 | rs397515912  | VCV000164109      | NC_000011.10:47342610:C:T           | NA     | NA    | 3     | 7.48E-06 | VKGL    | Missense              | Gly531Arg         | 1591G>A           |
| 11:47348486:T:G  | 11:47370037          | MYBPC3 | rs397516070  | VCV000042787      | NC_000011.10:47348485:T:G           | NA     | NA    | 3     | 7.48E-06 | ClinVar | Missense              | Tyr237Ser         | 710A>C            |
| 12:32850907:G:A  | 12:33003841          | PKP2   | rs372827156  | VCV000045016      | NC_000012.12:32850906:G:A           | 3      | NA    | NA    | 7.48E-06 | ClinVar | Nonsense              | Arg413Ter         | 1237C>T           |
| 14:23424817:C:A  | 14:23894026          | MYH7   | rs1060505018 | VCV000417718      | NC_000014.9:23424816:C:A            | NA     | NA    | 3     | 7.48E-06 | ClinVar | Missense              | Met877Leu         | 2631G>T           |
| 14:23424839:C:A  | 14:23894048          | MYH7   | rs36211715   | VCV000014120      | NC_000014.9:23424838:C:T            | NA     | 3     | 3     | 7.48E-06 | ClinVar | Missense              | Arg870His         | 2609G>A           |
| 14:23424854:T:A  | 14:23894063          | MYH7   | rs758891557  | VCV000454358      | NC_000014.9:23424853:T:A            | NA     | NA    | 3     | 7.48E-06 | ClinVar | Missense              | Lys865Met         | 2594A>T           |
| 14:23425814:G:A  | 14:23895023          | MYH7   | rs121913630  | VCV000014095      | NC_000014.9:23425813:G:A            | NA     | 3     | 3     | 7.48E-06 | ClinVar | Missense              | Arg723Cys         | 2167C>T           |
| 14:23427723:C:A  | 14:23896932          | MYH7   | rs121913626  | VCV000042862      | NC_000014.9:23427722:C:T            | NA     | 3     | 3     | 7.48E-06 | ClinVar | Missense              | Gly584Ser         | 1750G>A           |
| 14:23429038:G:A  | 14:23898247          | MYH7   | rs148808089  | VCV000177897      | NC_000014.9:23429037:G:A            | NA     | 3     | 3     | 7.48E-06 | ClinVar | Missense              | Arg442Cys         | 1324C>T           |
| 14:23429850:C:T  | 14:23899059          | MYH7   | rs397516088  | VCV000042820      | NC_000014.9:23429849:C:T            | NA     | 3     | 3     | 7.48E-06 | ClinVar | Missense              | Ala355Thr         | 1063G>A           |
| 18:31074908:C:G  | 18:28654874          | DSC2   | NA           | VCV000860937      | NC_000018.10:31074907:C:G           | 3      | NA    | NA    | 7.48E-06 | ClinVar | Splice acceptor       | NA                | 1664-1G>C         |
| 18:31521213:1:1  | 18:29101176-29101177 | DSG2   | rs781532110  | VCV000280230      | NC_000018.10:31521213:TT:TTT        | 3      | NA    | NA    | 7.48E-06 | ClinVar | Frameshift            | Gly166fs          | 495dup            |
| 18:31521233:G:T  | 18:29101196          | DSG2   | rs199926617  | VCV000577605      | NC_000018.10:31521232:G:T           | 3      | NA    | NA    | 7.48E-06 | VKGL    | Missense              | Leu171Phe         | 513G>T            |
| 18:31524549:T:A  | 18:29104512          | DSG2   | rs869025388  | VCV00022562       | NC_000018.10:31524548:T:A           | 3      | NA    | NA    | 7.48E-06 | ClinVar | Missense              | Asp264Glu         | 792T>A            |
| 18:31524744:1:1  | 18:29104707-29104708 | DSG2   | rs759944835  | VCV000639905      | NC_000018.10:31524744:A:AA          | 3      | NA    | NA    | 7.48E-06 | ClinVar | Frameshift            | Thr291fs          | 871dup            |
| 18:31541191:A:G  | 18:29121154          | DSG2   | rs397514038  | VCV000016817      | NC_000018.10:31541190:A:G           | 3      | NA    | NA    | 7.48E-06 | ClinVar | Splice acceptor       | NA                | 1880-2A>G         |
| 2:178546041:G:A  | 2:179410768          | TTN    | rs753334568  | VCV000132137      | NC_000002.12:178546040:G:A          | NA     | 3     | NA    | 7.48E-06 | ClinVar | Missense              | Pro31732Leu       | 95195C>T          |
| 2:178548460:G:A  | 2:179413187          | TTN    | rs72648250   | VCV000223326      | NC_000002.12:178548459:G:A          | NA     | 3     | NA    | 7.48E-06 | ClinVar | Nonsense              | Arg31056Ter       | 93166C>T          |
| 2:178563493:C:A  | 2:179428220          | TTN    | rs779874042  | VCV000202416      | NC_000002.12:178563492:C:A          | NA     | 3     | NA    | 7.48E-06 | ClinVar | Nonsense              | Glu27547Ter       | 82639G>T          |
| 2:178569267:C:T  | 2:179433994          | TTN    | rs756552975  | VCV000379555      | NC_000002.12:178569266:C:T          | NA     | 3     | NA    | 7.48E-06 | ClinVar | Nonsense              | Trp25622Ter       | 76865G>A          |
| 2:178569478:G:A  | 2:179434205          | TTN    | rs545954490  | VCV000404828      | NC_000002.12:178569477:G:A          | NA     | 3     | NA    | 7.48E-06 | ClinVar | Nonsense              | Arg25552Ter       | 76654C>T          |
| 2:178570804:G:A  | 2:179435531          | TTN    | rs794729382  | VCV000202521      | NC_000002.12:178570803:G:A          | NA     | 3     | NA    | 7.48E-06 | ClinVar | Nonsense              | Arg25110Ter       | 75328C>T          |
| 2:178575970:G:A  | 2:179440697          | TTN    | rs781540455  | VCV000202402      | NC_000002.12:178575969:G:A          | NA     | 3     | NA    | 7.48E-06 | ClinVar | Nonsense              | Arg23388Ter       | 70162C>T          |
| 2:178585291:G:A  | 2:179450018          | TTN    | rs768345594  | VCV000223315      | NC_000002.12:178585290:G:A          | NA     | 3     | NA    | 7.48E-06 | ClinVar | Nonsense              | Arg21485Ter       | 64453C>T          |
| 2:178588700:G:A  | 2:179453427          | TTN    | rs368452607  | VCV000202518      | NC_000002.12:178588699:G:A          | NA     | 3     | NA    | 7.48E-06 | ClinVar | Nonsense              | Arg21009Ter       | 63025C>T          |
| 2:178593338:G:A  | 2:179458065          | TTN    | rs1553649171 | VCV000466646      | NC_000002.12:178593337:G:A          | NA     | 3     | NA    | 7.48E-06 | ClinVar | Nonsense              | Arg19624Ter       | 58870C>T          |
| 2:178609756:G:A  | 2:179474483          | TTN    | NA           | VCV001066907      | NC_000002.12:178609755:G:A          | NA     | 3     | NA    | 7.48E-06 | VKGL    | Nonsense              | Arg17223Ter       | 51667C>T          |
| 2:178733497:G:A  | 2:179598224          | TTN    | rs372277017  | VCV000130662      | NC_000002.12:178733496:G:A          | NA     | 3     | NA    | 7.48E-06 | VKGL    | Nonsense              | Arg5266Ter        | 15796C>T          |
| 2:219421560:G:A  | 2:220286282          | DES    | rs1262288015 | VCV000626714      | NC_000002.12:219421559:G:A          | NA     | 3     | NA    | 7.48E-06 | VKGL    | Missense              | Arg415Gln         | 1244G>A           |
| 2:219423817:C:T  | 2:220288539          | DES    | rs150974575  | VCV000177872      | NC_000002.12:219423816:C:T          | 3      | 3     | NA    | 7.48E-06 | ClinVar | Nonsense              | Arg429Ter         | 1285C>T           |
| 6:118585994:C:T  | 6:118880157          | PLN    | rs761056344  | VCV000202040      | NC_000006.12:118585993:C:T          | NA     | 3     | NA    | 7.48E-06 | VKGL    | Missense              | Arg25Cys          | 73C>T             |
| 6:7580388:C:T    | 6:7580621            | DSP    | rs770873593  | VCV000199884      | NC_000006.12:7580387:C:T            | 3      | 3     | NA    | 7.48E-06 | ClinVar | Nonsense              | Arg1400Ter        | 4198C>T           |
| 6:7580547:C:T    | 6:7580780            | DSP    | rs1561698750 | VCV000576091      | NC_000006.12:7580546:C:T            | 3      | 3     | NA    | 7.48E-06 | ClinVar | Nonsense              | Gln1453Ter        | 4357C>T           |
| 7:128845989:G:C  | 7:128486043          | FLNC   | rs781135153  | VCV000420146      | NC_000007.14:128845988:G:C          | NA     | 3     | NA    | 7.48E-06 | ClinVar | Splice acceptor       | NA                | 3791-1G>C         |
| 7:128846444:C:T  | 7:128486498          | FLNC   | NA           | VCV000842060      | NC_000007.14:128846443:C:T          | NA     | 3     | NA    | 7.48E-06 | ClinVar | Nonsense              | Arg1370Ter        | 4108C>T           |
| 12:32802499:G:A  | 12:32955433          | PKP2   | rs121434441  | VCV000006755      | NC_000012.12:32802498:G:A           | 2      | NA    | NA    | 4.98E-06 | ClinVar | Nonsense              | Arg691Ter         | 2071C>T           |
| 1:156135913:G:A  | 1:156105704          | LMNA   | rs56816490   | VCV000048093      | NC_000001.11:156135912:G:A          | NA     | 2     | NA    | 4.98E-06 | ClinVar | Missense              | Glu317Lys         | 949G>A            |
| 1:201359217:C:T  | 1:201328345          | TNNT2  | rs727504247  | VCV000177636      | NC_000001.11:201359216:C:T          | NA     | 2     | 2     | 4.98E-06 | ClinVar | Nonsense              | Trp297Ter         | 890G>A            |
| 1:201363352:C:A  | 1:201332480          | TNNT2  | rs730881097  | VCV000181612      | NC_000001.11:201363351:C:A          | NA     | 2     | 2     | 4.98E-06 | VKGL    | Missense              | Ala182Ser         | 544G>T            |
| 1:77926827:G:T   | 1:78392512           | NEXN   | rs771262904  | VCV000599095      | NC_000001.11:77926826:G:T           | NA     | 2     | NA    | 4.98E-06 | ClinVar | Nonsense              | Glu267Ter         | 799G>T            |
| 1:77942736:C:G   | 1:78408421           | NEXN   | rs794729086  | VCV000201935      | NC_000001.11:77942735:C:G           | NA     | 2     | NA    | 4.98E-06 | ClinVar | Missense              | Phe645Leu         | 1935C>G           |
| 10:119670037:C:T | 10:121429549         | BAG3   | rs387906875  | VCV000030397      | NC_000010.11:119670036:C:T          | NA     | 2     | NA    | 4.98E-06 | ClinVar | Nonsense              | Arg123Ter         | 367C>T            |
| 10:119676479:C:T | 10:121435991         | BAG3   | rs869248137  | VCV000228322      | NC_000010.11:119676478:C:T          | NA     | 2     | NA    | 4.98E-06 | ClinVar | Nonsense              | Arg309Ter         | 925C>T            |
| 11:47332105:C:T  | 11:47353656          | MYBPC3 | rs730880141  | VCV000180414      | NC_000011.10:47332104:C:T           | NA     | NA    | 2     | 4.98E-06 | VKGL    | Missense              | Glu1261Lys        | 3781G>A           |
| 11:47332894:D:3  | 11:47354445          | MYBPC3 | rs730880674  | VCV000181102      | NC_000011.10:47332894:AGTAGTAG:AGT  | NA     | NA    | 2     | 4.98E-06 | VKGL    | NA                    | Tyr1136del        | 3404ACT[1]        |
| 11:4733352:C:T   | 11:47355103          | MYBPC3 | rs587782958  | VCV000155808      | NC_000011.10:4733351:C:T            | NA     | NA    | 2     | 4.98E-06 | ClinVar | NA                    | NA                | 3190+5G>A         |
| 11:47335041:C:T  | 11:47355692          | MYBPC3 | rs397515991  | VCV000042666      | NC_000011.10:47335040:C:T           | NA     | NA    | 2     | 4.98E-06 | VKGL    | Splice donor          | NA                | 2905+1G>A         |
| 11:47335120:G:A  | 11:47356671          | MYBPC3 | rs387907267  | VCV000037039      | NC_000011.10:47335119:G:A           | NA     | NA    | 2     | 4.98E-06 | ClinVar | Nonsense              | Arg943Ter         | 2827C>T           |
| 11:47335165:D:2  | 11:47356716          | MYBPC3 | rs727504265  | VCV000177660      | NC_000011.10:47335165:TGTGTG:TGTG   | NA     | NA    | 2     | 4.98E-06 | ClinVar | Frameshift            | Thr927fs          | 2780_2781del      |
| 11:47336003:D:1  | 11:47357554          | MYBPC3 | rs397515979  | VCV000181083      | NC_000011.10:47336003:GGGGGG:GGGG   | NA     | NA    | 2     | 4.98E-06 | ClinVar | Frameshift            | Ser871fs          | 2610del           |
| 11:47342096:G:A  | 11:47363647          | MYBPC3 | rs730880694  | VCV000656085      | NC_000011.10:47342095:G:A           | NA     | NA    | 2     | 4.98E-06 | VKGL    | Missense              | Ala562Val         | 1685C>T           |
| 11:47342697:C:T  | 11:47364248          | MYBPC3 | rs397515907  | VCV000042541      | NC_000011.10:47342696:C:T           | NA     | NA    | 2     | 4.98E-06 | ClinVar | Missense              | Arg502Gln         | 1505G>A           |
| 11:47347856:C:T  | 11:47369407          | MYBPC3 | rs397516073  | VCV000042791      | NC_000011.10:47347855:C:T           | NA     | NA    | 2     | 4.98E-06 | ClinVar | Splice donor          | NA                | 821+1G>A          |
| 11:47352622:C:T  | 11:47374173          | MYBPC3 | rs113709679  | VCV000810740      | NC_000011.10:47352621:C:T           | NA     | NA    | 2     | 4.98E-06 | ClinVar | Splice donor          | NA                | 25+1G>A           |
| 12:32802402:C:T  | 12:32955336          | PKP2   | rs794729116  | VCV000202005      | NC_000012.12:32802401:C:T           | 2      | NA    | NA    | 4.98E-06 | ClinVar | Splice donor          | NA                | 2167+1G>A         |
| 12:32821502:C:A  | 12:32974436          | PKP2   | rs397517015  | VCV000045054      | NC_000012.12:32821501:C:A           | 2      | NA    | NA    | 4.98E-06 | ClinVar | Nonsense              | Glu623Ter         | 1867G>T           |
| 12:32822502:1:19 | 12:32822502-32822503 | PKP2   | rs1555142971 | VCV000523703      | NC_000012.12:32822502:AATACCTTTGTTG | 2      | NA    | NA    | 4.98E-06 | ClinVar | Nonsense              | Gly602Ter         | 1785_1803dup      |
| 12:32868965:G:A  | 12:33021899          | PKP2   | rs397516986  | VCV000045010      | NC_000012.12:32868964:G:A           | 2      | NA    | NA    | 4.98E-06 | ClinVar | Nonsense              | Gln378Ter         | 1132C>T           |
| 14:23415385:G:A  | 14:23884594          | MYH7   | rs727505294  | VCV000180024      | NC_000014.9:23415384:G:A            | NA     | 2     | 2     | 4.98E-06 | VKGL    | Missense              | Thr1760Met        | 5279C>T           |
| 14:23417670:G:A  | 14:23886879          | MYH7   | rs730880793  | VCV000181246      | NC_000014.9:23417669:G:A            | NA     | NA    | 2     | 4.98E-06 | VKGL    | Missense              | Arg1396Trp        | 4186C>T           |

| SNP              | GRCh37                | Gene   | rsID         | Accession ClinVar | Canonical SPDI                     | N ARVC | N DCM | N HCM | MAF      | Origin  | Molecular Consequence | Amino acid change | Nucleotide change |
|------------------|-----------------------|--------|--------------|-------------------|------------------------------------|--------|-------|-------|----------|---------|-----------------------|-------------------|-------------------|
| 14:23418244:C:T  | 14:23887453           | MYH7   | rs397516202  | VCV000042993      | NC_000014.9:23418243:C:T           | NA     | 2     | 2     | 4.98E-06 | ClinVar | Missense              | Ala1379Thr        | 4135G>A           |
| 14:23418313:C:T  | 14:23887522           | MYH7   | rs727503246  | VCV000164294      | NC_000014.9:23418312:C:T           | NA     | NA    | 2     | 4.98E-06 | ClinVar | Missense              | Glu1356Lys        | 4066G>A           |
| 14:23424107:G:C  | 14:23893316           | MYH7   | rs121913631  | VCV000014097      | NC_000014.9:23424106:G:C           | NA     | 2     | 2     | 4.98E-06 | ClinVar | Missense              | Leu908Val         | 2722C>G           |
| 14:23424909:T:C  | 14:23894118           | MYH7   | rs727504310  | VCV000177757      | NC_000014.9:23424908:T:C           | NA     | 2     | 2     | 4.98E-06 | ClinVar | Missense              | Lys847Glu         | 2539A>G           |
| 14:23426045:C:T  | 14:23895254           | MYH7   | rs886039030  | VCV000264068      | NC_000014.9:23426044:C:T           | NA     | 2     | 2     | 4.98E-06 | ClinVar | Missense              | Arg694His         | 2081G>A           |
| 14:23429255:C:T  | 14:23898464           | MYH7   | rs730880868  | VCV000181339      | NC_000014.9:23429254:C:T           | NA     | 2     | 2     | 4.98E-06 | VKGL    | Missense              | Val411Ile         | 1231G>A           |
| 14:23431602:C:T  | 14:23900811           | MYH7   | rs397516264  | VCV000043100      | NC_000014.9:23431601:C:T           | NA     | 2     | 2     | 4.98E-06 | ClinVar | Missense              | Asp239Asn         | 715G>A            |
| 14:23431790:G:A  | 14:23900999           | MYH7   | rs397516259  | VCV000181315      | NC_000014.9:23431789:G:A           | NA     | NA    | 2     | 4.98E-06 | VKGL    | Missense              | Arg204Cys         | 610C>T            |
| 15:63060899:G:A  | 15:63353098           | TPM1   | rs104894503  | VCV000012456      | NC_000015.10:63060898:G:A          | NA     | 2     | 2     | 4.98E-06 | ClinVar | Missense              | Asp175Asn         | 523G>A            |
| 15:63061723:G:A  | 15:63353922           | TPM1   | rs199476315  | VCV000031882      | NC_000015.10:63061722:G:A          | NA     | NA    | 2     | 4.98E-06 | ClinVar | Missense              | Glu192Lys         | 574G>A            |
| 15:63061751:C:T  | 15:63353950           | TPM1   | rs730881141  | VCV000181668      | NC_000015.10:63061750:C:T          | NA     | NA    | 2     | 4.98E-06 | VKGL    | Missense              | Thr201Met         | 602C>T            |
| 18:31519867:G:A  | 18:29099830           | DSG2   | rs121913006  | VCV000016810      | NC_000018.10:31519866:G:A          | 2      | NA    | NA    | 4.98E-06 | ClinVar | Missense              | Arg49His          | 146G>A            |
| 18:31524752:G:A  | 18:29104715-29104716  | DSG2   | rs1187924885 | VCV0000691669     | NC_000018.10:31524752:AAAA:AAAA    | 2      | NA    | NA    | 4.98E-06 | ClinVar | Frameshift            | Val295fs          | 882dup            |
| 18:31545783:T:G  | 18:29125746           | DSG2   | NA           | VCV0000943833     | NC_000018.10:31545782:T:G          | 2      | NA    | NA    | 4.98E-06 | ClinVar | Nonsense              | Tyr799Ter         | 2397T>G           |
| 19:55154082:G:A  | 19:55665450           | TNNI3  | rs727504242  | VCV000177630      | NC_000019.10:55154081:G:A          | NA     | NA    | 2     | 4.98E-06 | ClinVar | Missense              | Ser166Phe         | 497C>T            |
| 19:55154145:C:T  | 19:55665513           | TNNI3  | rs397516349  | VCV000043384      | NC_000019.10:55154144:C:T          | NA     | 2     | 2     | 4.98E-06 | ClinVar | Missense              | Arg145Gln         | 434G>A            |
| 19:55154146:G:A  | 19:55665514           | TNNI3  | rs104894724  | VCV000012426      | NC_000019.10:55154145:G:A          | NA     | 2     | 2     | 4.98E-06 | ClinVar | Missense              | Arg145Trp         | 433C>T            |
| 2:178531788:G:A  | 2:179396515           | TTN    | NA           | VCV0000954597     | NC_000002.12:178531787:G:A         | NA     | 2     | NA    | 4.98E-06 | ClinVar | Nonsense              | Arg34943Ter       | 104827C>T         |
| 2:178531962:G:A  | 2:179396689           | TTN    | rs1057518003 | VCV000372824      | NC_000002.12:178531961:G:A         | NA     | 2     | NA    | 4.98E-06 | ClinVar | Nonsense              | Arg34885Ter       | 104653C>T         |
| 2:178532670:G:A  | 2:179397397           | TTN    | rs995029896  | VCV0000570433     | NC_000002.12:178532669:G:A         | NA     | 2     | NA    | 4.98E-06 | ClinVar | Nonsense              | Arg34649Ter       | 103945C>T         |
| 2:178532910:T:A  | 2:179397637           | TTN    | rs1553490574 | VCV000499641      | NC_000002.12:178532909:T:A         | NA     | 2     | NA    | 4.98E-06 | ClinVar | Nonsense              | Lys34569Ter       | 103705A>T         |
| 2:178534092:G:A  | 2:179398819           | TTN    | rs752697861  | VCV000464497      | NC_000002.12:178534091:G:A         | NA     | 2     | NA    | 4.98E-06 | ClinVar | Nonsense              | Arg34175Ter       | 102523C>T         |
| 2:178535508:G:A  | 2:179400235           | TTN    | rs766265889  | VCV000625156      | NC_000002.12:178535507:G:A         | NA     | 2     | NA    | 4.98E-06 | ClinVar | Nonsense              | Arg33703Ter       | 101107C>T         |
| 2:178535729:C:T  | 2:179400456           | TTN    | rs1260821931 | VCV000488972      | NC_000002.12:178535728:C:T         | NA     | 2     | NA    | 4.98E-06 | ClinVar | Nonsense              | Trp33629Ter       | 100886G>A         |
| 2:178542263:C:G  | 2:179406990           | TTN    | rs727505319  | VCV000180058      | NC_000002.12:178542262:C:G         | NA     | 2     | NA    | 4.98E-06 | ClinVar | Splice donor          | NA                | 97492+1G>C        |
| 2:178547518:D:5  | 2:179412245           | TTN    | rs769488730  | VCV000202493      | NC_000002.12:178547518:TTTAATT:TTT | NA     | 2     | NA    | 4.98E-06 | VKGL    | Frameshift            | p.Ile31368fs      | 94103_94107del    |
| 2:178568057:G:T  | 2:179432784           | TTN    | rs1553597198 | VCV000535021      | NC_000002.12:178568056:G:T         | NA     | 2     | NA    | 4.98E-06 | ClinVar | Missense              | Tyr26025Ter       | 78075C>A          |
| 2:178575154:G:A  | 2:179439881           | TTN    | rs1553612386 | VCV000466655      | NC_000002.12:178575153:G:A         | NA     | 2     | NA    | 4.98E-06 | ClinVar | Nonsense              | Arg23660Ter       | 70978C>T          |
| 2:178576691:G:A  | 2:179441418           | TTN    | rs878854328  | VCV000238830      | NC_000002.12:178576690:G:A         | NA     | 2     | NA    | 4.98E-06 | ClinVar | Nonsense              | Arg23185Ter       | 69553C>T          |
| 2:178592916:D:2  | 2:179457644-179457645 | TTN    | rs752948913  | VCV000419310      | NC_000002.12:178592916:AG:         | NA     | 2     | NA    | 4.98E-06 | ClinVar | Frameshift            | Pro19734fs        | 59201_59202del    |
| 2:178609289:G:A  | 2:179474016           | TTN    | rs926741242  | VCV000405082      | NC_000002.12:178609288:G:A         | NA     | 2     | NA    | 4.98E-06 | ClinVar | Nonsense              | Arg17341Ter       | 52021C>T          |
| 2:178612430:G:A  | 2:179477157           | TTN    | NA           | VCV000862652      | NC_000002.12:178612429:G:A         | NA     | 2     | NA    | 4.98E-06 | ClinVar | Nonsense              | Gln16699Ter       | 50095C>T          |
| 2:178617857:G:A  | 2:179482584           | TTN    | rs751746401  | VCV000264517      | NC_000002.12:178617856:G:A         | NA     | 2     | NA    | 4.98E-06 | ClinVar | Nonsense              | Arg15832Ter       | 47494C>T          |
| 2:178740646:G:T  | 2:179605373           | TTN    | rs370912401  | VCV000047827      | NC_000002.12:178740645:G:T         | NA     | 2     | NA    | 4.98E-06 | VKGL    | Nonsense              | Ser1496Ter        | 12587C>A          |
| 2:178766474:G:A  | 2:179631201           | TTN    | rs757836789  | VCV000288998      | NC_000002.12:178766473:G:A         | NA     | 2     | NA    | 4.98E-06 | VKGL    | Nonsense              | Arg3204Ter        | 9610C>T           |
| 2:219418497:C:T  | 2:220283219           | DES    | rs267607495  | VCV000066412      | NC_000002.12:219418496:C:T         | 2      | 2     | NA    | 4.98E-06 | ClinVar | Missense              | Ser12Phe          | 35C>T             |
| 3:38566426:C:T   | 3:38607917            | SCN5A  | rs137854618  | VCV000009401      | NC_000003.12:38566425:C:T          | NA     | 2     | NA    | 4.98E-06 | ClinVar | Missense              | Asp1274Asn        | 3820G>A           |
| 6:7568443:C:T    | 6:7568676             | DSP    | rs397516915  | VCV000044856      | NC_000006.12:7568442:C:T           | 2      | 2     | NA    | 4.98E-06 | ClinVar | Nonsense              | Arg425Ter         | 1273C>T           |
| 6:7579527:C:T    | 6:7579760             | DSP    | rs746877365  | VCV000405247      | NC_000006.12:7579526:C:T           | 2      | 2     | NA    | 4.98E-06 | ClinVar | Nonsense              | Arg1113Ter        | 3337C>T           |
| 6:7579995:C:T    | 6:7580228             | DSP    | rs767643821  | VCV000199881      | NC_000006.12:7579994:C:T           | 2      | 2     | NA    | 4.98E-06 | ClinVar | Nonsense              | Arg1269Ter        | 3805C>T           |
| 6:7582690:C:T    | 6:7582923             | DSP    | rs397516946  | VCV000044928      | NC_000006.12:7582689:C:T           | 2      | NA    | NA    | 4.98E-06 | ClinVar | Nonsense              | Gln1810Ter        | 5428C>T           |
| 7:128844045:C:T  | 7:1288484099          | FLNC   | rs886037830  | VCV000267288      | NC_000007.14:128844044:C:T         | NA     | 2     | NA    | 4.98E-06 | ClinVar | Nonsense              | Arg991Ter         | 2971C>T           |
| 7:128846136:C:T  | 7:1288486190          | FLNC   | rs766330686  | VCV000579589      | NC_000007.14:128846135:C:T         | NA     | 2     | NA    | 4.98E-06 | ClinVar | Nonsense              | Arg1313Ter        | 3937C>T           |
| 3:46860702:C:T   | 3:46902192            | MYL3   | rs199474703  | VCV000031777      | NC_000003.12:46860701:C:T          | NA     | NA    | 1     | 2.49E-06 | ClinVar | Missense              | Arg94His          | 281G>A            |
| 6:7584359:G:A    | 6:7584592             | DSP    | rs387906618  | VCV000029672      | NC_000006.12:7584358:G:A           | NA     | 1     | NA    | 2.49E-06 | ClinVar | Missense              | Arg2366His        | 7097G>A           |
| 2:178774206:C:T  | 2:179638933           | TTN    | NA           | VCV000873434      | NC_000002.12:178774205:C:T         | NA     | 1     | NA    | 2.49E-06 | VKGL    | Splice donor          | NA                | 7057+1G>A         |
| 1:156134458:G:A  | 1:156104249           | LMNA   | rs267607571  | VCV000066910      | NC_000001.11:156134457:G:A         | NA     | 1     | NA    | 2.49E-06 | ClinVar | Missense              | Arg190Gln         | 569G>A            |
| 1:201361989:G:A  | 1:201331117           | TNNI2  | rs45586240   | VCV000180554      | NC_000001.11:201361988:G:A         | NA     | 1     | 1     | 2.49E-06 | VKGL    | Missense              | Arg215Trp         | 643C>T            |
| 1:201362016:G:A  | 1:201331144           | TNNI2  | NA           | VCV000181625      | NC_000001.11:201362015:G:A         | NA     | 1     | 1     | 2.49E-06 | ClinVar | Missense              | Arg206Trp         | 616C>T            |
| 1:201363349:G:A  | 1:201332477           | TNNI2  | rs727503512  | VCV000228409      | NC_000001.11:201363348:G:A         | NA     | 1     | 1     | 2.49E-06 | ClinVar | Missense              | Arg183Trp         | 547C>T            |
| 1:201365291:C:A  | 1:201334419           | TNNI2  | rs397516457  | VCV000043629      | NC_000001.11:201365290:C:A         | NA     | 1     | 1     | 2.49E-06 | ClinVar | Missense              | Arg104Leu         | 311G>T            |
| 1:201365638:A:T  | 1:201334766           | TNNI2  | rs121964855  | VCV000012408      | NC_000001.11:201365637:A:T         | NA     | 1     | 1     | 2.49E-06 | ClinVar | Missense              | Ile89Asn          | 266T>A            |
| 10:110812573:C:T | 10:112572331          | RBM20  | rs1393804220 | VCV000538028      | NC_000010.11:110812572:C:T         | NA     | 1     | NA    | 2.49E-06 | VKGL    | Nonsense              | Arg726Ter         | 2176C>T           |
| 11:19188245:A:C  | 11:19209792           | CSR3P  | rs104894204  | VCV000008777      | NC_000011.10:19188244:A:C          | NA     | NA    | 1     | 2.49E-06 | ClinVar | Missense              | Cys58Gly          | 172T>G            |
| 11:47332189:G:A  | 11:47353740           | MYBPC3 | rs397516037  | VCV000042735      | NC_000011.10:47332188:G:A          | NA     | NA    | 1     | 2.49E-06 | ClinVar | Nonsense              | Gln1233Ter        | 3697C>T           |
| 11:47333923:T:C  | 11:47355474           | MYBPC3 | rs727503177  | VCV000164052      | NC_000011.10:47333922:T:C          | NA     | NA    | 1     | 2.49E-06 | VKGL    | Missense              | Gln998Arg         | 2993A>G           |
| 11:47335081:D:2  | 11:47356632           | MYBPC3 | rs397515990  | VCV000042663      | NC_000011.10:47335081:A:C          | NA     | NA    | 1     | 2.49E-06 | ClinVar | Frameshift            | Pro955fs          | 2864_2865del      |
| 11:47337535:G:A  | 11:47359086           | MYBPC3 | rs775404728  | VCV000195850      | NC_000011.10:47337534:G:A          | NA     | NA    | 1     | 2.49E-06 | VKGL    | Missense              | Arg820Trp         | 2458C>T           |
| 11:47341230:G:A  | 11:47362781           | MYBPC3 | rs730880551  | VCV000180950      | NC_000011.10:47341229:G:A          | NA     | NA    | 1     | 2.49E-06 | ClinVar | Missense              | Thr602Ile         | 1805C>T           |
| 11:47342882:D:1  | 11:47364433           | MYBPC3 | rs886037900  | VCV000254153      | NC_000011.10:47342882:CCCC:CCC     | NA     | NA    | 1     | 2.49E-06 | VKGL    | Frameshift            | Gln469fs          | 1404del           |

| SNP             | GRCh37                | Gene   | rsID         | Accession ClinVar | Canonical SPDI                     | N ARVC | N DCM | N HCM | MAF      | Origin  | Molecular Consequence | Amino acid change   | Nucleotide change |
|-----------------|-----------------------|--------|--------------|-------------------|------------------------------------|--------|-------|-------|----------|---------|-----------------------|---------------------|-------------------|
| 11:47343019:A:G | 11:47364570           | MYBPC3 | rs397515897  | VCV000042525      | NC_000011.10:47343018:A:G          | NA     | NA    | 1     | 2.49E-06 | ClinVar | Splice donor          | NA                  | 1351+2T>C         |
| 11:47343147:T:C | 11:47364698           | MYBPC3 | rs730880531  | VCV000180925      | NC_000011.10:47343146:T:C          | NA     | NA    | 1     | 2.49E-06 | ClinVar | Splice acceptor       | NA                  | 1227-2A>G         |
| 11:47343342:C:T | 11:47364893           | MYBPC3 | rs1025692267 | VCV000693982      | NC_000011.10:47343341:C:T          | NA     | NA    | 1     | 2.49E-06 | ClinVar | NA                    | NA                  | 1224-80G>A        |
| 11:47343505:G:A | 11:47365056           | MYBPC3 | rs727504329  | VCV000177796      | NC_000011.10:47343504:G:A          | NA     | NA    | 1     | 2.49E-06 | ClinVar | Nonsense              | Gln404Ter           | 1210C>T           |
| 11:47346217:C:A | 11:47367768           | MYBPC3 | rs730880632  | VCV000181057      | NC_000011.10:47346216:C:A          | NA     | NA    | 1     | 2.49E-06 | ClinVar | Missense              | Lys360Asn           | 1080G>C           |
| 11:47347661:G:T | 11:47369212           | MYBPC3 | rs371711564  | VCV000454335      | NC_000011.10:47347660:G:T          | NA     | NA    | 1     | 2.49E-06 | VKGL    | Synonymous            | Arg281=             | 841C>A            |
| 11:47347854:C:A | 11:47369405           | MYBPC3 | rs727503213  | VCV000228869      | NC_000011.10:47347853:C:A          | NA     | NA    | 1     | 2.49E-06 | VKGL    | NA                    | NA                  | 821+3G>T          |
| 12:32821487:D:1 | 12:32974421           | PKP2   | rs764817683  | VCV000202022      | NC_000012.12:32821487:GGGG:GGG     | 1      | NA    | NA    | 2.49E-06 | VKGL    | Frameshift            | Arg528fs            | 1881del           |
| 12:32824163:C:G | 12:32977097           | PKP2   | rs78897684   | VCV000201989      | NC_000012.12:32824162:C:G          | 1      | NA    | NA    | 2.49E-06 | ClinVar | Splice acceptor       | NA                  | 1557-1G>C         |
| 12:32850771:D:4 | 12:33003705           | PKP2   | rs397516993  | VCV000045020      | NC_000012.12:32850771:TTTGT:TTT    | 1      | NA    | NA    | 2.49E-06 | VKGL    | Nonsense              | Lys456_Gln457insTer | 1369_1372del      |
| 12:32869034:G:A | 12:33021968           | PKP2   | rs754912778  | VCV000201977      | NC_000012.12:32869033:G:A          | 1      | NA    | NA    | 2.49E-06 | ClinVar | Nonsense              | Arg355Ter           | 1063C>T           |
| 12:32878426:G:A | 12:33031360           | PKP2   | NA           | VCV000927573      | NC_000012.12:32878425:G:A          | 1      | NA    | NA    | 2.49E-06 | VKGL    | Missense              | Pro152Ser           | 454C>T            |
| 12:32878512:C:T | 12:33031446           | PKP2   | rs760576804  | VCV000196395      | NC_000012.12:32878511:C:T          | 1      | NA    | NA    | 2.49E-06 | ClinVar | Nonsense              | Trp123Ter           | 368G>A            |
| 12:32879021:G:A | 12:33031955           | PKP2   | rs121434420  | VCV000006754      | NC_000012.12:32879020:G:A          | 1      | NA    | NA    | 2.49E-06 | ClinVar | Nonsense              | Arg79Ter            | 235C>T            |
| 14:23415652:G:A | 14:23884861           | MYH7   | rs121913650  | VCV000014118      | NC_000014.9:23415651:G:A           | NA     | 1     | 1     | 2.49E-06 | ClinVar | Missense              | Arg1712Trp          | 5134C>T           |
| 14:23416129:C:T | 14:23885338           | MYH7   | rs730880810  | VCV000312894      | NC_000014.9:23416128:C:T           | NA     | 1     | 1     | 2.49E-06 | VKGL    | Missense              | Glu1610Lys          | 4828G>A           |
| 14:23417174:G:A | 14:23886383           | MYH7   | rs45544633   | VCV000164284      | NC_000014.9:23417173:G:A           | NA     | 1     | 1     | 2.49E-06 | ClinVar | Missense              | Arg1500Trp          | 4498C>T           |
| 14:23417209:T:C | 14:23886418           | MYH7   | NA           | VCV000920179      | NC_000014.9:23417208:T:C           | NA     | 1     | 1     | 2.49E-06 | VKGL    | Missense              | Tyr1488Cys          | 4463A>G           |
| 14:23418337:C:T | 14:23887546           | MYH7   | rs1275262402 | VCV000524974      | NC_000014.9:23418336:C:T           | NA     | 1     | 1     | 2.49E-06 | VKGL    | Missense              | Glu1348Lys          | 4042G>A           |
| 14:23422267:C:T | 14:23891476           | MYH7   | rs587782962  | VCV000155814      | NC_000014.9:23422266:C:T           | NA     | 1     | 1     | 2.49E-06 | ClinVar | Missense              | Arg1053Gln          | 3158G>A           |
| 14:23423966:C:T | 14:23893175           | MYH7   | rs886039204  | VCV000264608      | NC_000014.9:23423965:C:T           | NA     | NA    | 1     | 2.49E-06 | VKGL    | Missense              | Asp955Asn           | 2863G>A           |
| 14:23426046:G:A | 14:23895255           | MYH7   | rs727504240  | VCV000177627      | NC_000014.9:23426045:G:A           | NA     | NA    | 1     | 2.49E-06 | VKGL    | Missense              | Arg694Cys           | 2080C>T           |
| 14:23427840:C:T | 14:23897049           | MYH7   | rs564101364  | VCV000264607      | NC_000014.9:23427839:C:T           | NA     | 1     | 1     | 2.49E-06 | VKGL    | Missense              | Asp545Asn           | 1633G>A           |
| 14:23429279:G:A | 14:23898488           | MYH7   | rs3218714    | VCV000014102      | NC_000014.9:23429278:G:A           | NA     | 1     | 1     | 2.49E-06 | ClinVar | Missense              | Arg403Trp           | 1207C>T           |
| 14:23431426:G:A | 14:23900635           | MYH7   | rs397516269  | VCV000043106      | NC_000014.9:23431425:A:G           | NA     | 1     | 1     | 2.49E-06 | ClinVar | Missense              | Ile263Thr           | 788T>C            |
| 14:23431611:C:T | 14:23900820           | MYH7   | rs397516261  | VCV000043096      | NC_000014.9:23431610:C:T           | NA     | 1     | 1     | 2.49E-06 | VKGL    | Missense              | Val236Ile           | 706G>A            |
| 15:34791163:C:T | 15:35083364           | ACTC1  | rs121912673  | VCV000018323      | NC_000015.10:34791162:C:T          | NA     | 1     | 1     | 2.49E-06 | VKGL    | Missense              | Arg314His           | 941G>A            |
| 18:31070776:G:A | 18:28650742           | DSG2   | rs769022411  | VCV000568186      | NC_000018.10:31070775:G:A          | 1      | NA    | NA    | 2.49E-06 | ClinVar | Nonsense              | Gln734Ter           | 2200C>T           |
| 18:31498297:G:A | 18:29078260           | DSG2   | rs1568098570 | VCV000567764      | NC_000018.10:31498296:G:A          | 1      | NA    | NA    | 2.49E-06 | ClinVar | Splice donor          | NA                  | 45+1G>A           |
| 18:31521244:G:C | 18:29101207           | DSG2   | rs553299589  | VCV000188450      | NC_000018.10:31521243:G:C          | 1      | NA    | NA    | 2.49E-06 | ClinVar | Splice donor          | NA                  | 523+1G>C          |
| 18:31522250:G:A | 18:29102213           | DSG2   | rs750176752  | VCV000410373      | NC_000018.10:31522249:G:A          | 1      | NA    | NA    | 2.49E-06 | ClinVar | Splice donor          | NA                  | 690+1G>A          |
| 18:31524554:G:G | 18:29104517           | DSG2   | rs121913011  | VCV000016815      | NC_000018.10:31524553:A:G          | 1      | NA    | NA    | 2.49E-06 | ClinVar | Missense              | Asn266Ser           | 797A>G            |
| 18:31538849:C:T | 18:29118812           | DSG2   | rs794728086  | VCV000199810      | NC_000018.10:31538848:C:T          | 1      | NA    | NA    | 2.49E-06 | ClinVar | Nonsense              | Gln584Ter           | 1750C>T           |
| 18:31538922:I:1 | 18:29118885-29118886  | DSG2   | rs1039633976 | VCV000585217      | NC_000018.10:31538922:GGG:GGGG     | 1      | NA    | NA    | 2.49E-06 | ClinVar | Frameshift            | Leu610fs            | 1826dup           |
| 19:55154157:C:T | 19:55665525           | TNNI3  | rs397516347  | VCV000043381      | NC_000019.10:55154156:C:T          | NA     | 1     | 1     | 2.49E-06 | ClinVar | Missense              | Arg141Gln           | 422G>A            |
| 2:178528367:G:A | 2:179393094           | TTN    | rs1477669354 | VCV000640886      | NC_000002.12:178528366:G:A         | NA     | 1     | NA    | 2.49E-06 | ClinVar | Nonsense              | Arg35762Ter         | 107284C>T         |
| 2:178528797:G:A | 2:179393524           | TTN    | rs565675340  | VCV000242530      | NC_000002.12:178528796:G:A         | NA     | 1     | NA    | 2.49E-06 | ClinVar | Nonsense              | Arg35652Ter         | 106954C>T         |
| 2:178529959:C:T | 2:179394686           | TTN    | rs760915007  | VCV000617573      | NC_000002.12:178529958:C:T         | NA     | 1     | NA    | 2.49E-06 | ClinVar | Splice donor          | NA                  | 106531+1G>A       |
| 2:178532100:G:A | 2:179396827           | TTN    | rs1553488049 | VCV000535030      | NC_000002.12:178532099:G:A         | NA     | 1     | NA    | 2.49E-06 | ClinVar | Nonsense              | Arg34839Ter         | 104515C>T         |
| 2:178532202:G:A | 2:179396929           | TTN    | rs750519430  | VCV000290707      | NC_000002.12:178532201:G:A         | NA     | 1     | NA    | 2.49E-06 | VKGL    | Nonsense              | Arg34805Ter         | 104413C>T         |
| 2:178532844:G:A | 2:179397571           | TTN    | NA           | VCV000934781      | NC_000002.12:178532843:G:A         | NA     | 1     | NA    | 2.49E-06 | ClinVar | Nonsense              | Arg34591Ter         | 103771C>T         |
| 2:178534619:C:T | 2:179399346           | TTN    | rs869312068  | VCV000223304      | NC_000002.12:178534618:C:T         | NA     | 1     | NA    | 2.49E-06 | ClinVar | Nonsense              | Trp33999Ter         | 101996G>A         |
| 2:178535790:G:A | 2:179400517           | TTN    | rs1057518195 | VCV000373074      | NC_000002.12:178535789:G:A         | NA     | 1     | NA    | 2.49E-06 | ClinVar | Nonsense              | Arg33609Ter         | 100825C>T         |
| 2:178536357:C:A | 2:179401084           | TTN    | rs374920916  | VCV000654634      | NC_000002.12:178536356:C:A         | NA     | 1     | NA    | 2.49E-06 | ClinVar | Nonsense              | Glu33464Ter         | 100390G>T         |
| 2:178544357:G:A | 2:179409084           | TTN    | NA           | VCV001067228      | NC_000002.12:178544356:G:A         | NA     | 1     | NA    | 2.49E-06 | VKGL    | Nonsense              | Arg31958Ter         | 95872C>T          |
| 2:178546102:A:G | 2:179410829           | TTN    | rs869320740  | VCV000132133      | NC_000002.12:178546101:A:G         | NA     | 1     | NA    | 2.49E-06 | ClinVar | Missense              | Cys31712Aarg        | 95134T>C          |
| 2:178546476:G:A | 2:179411203           | TTN    | rs869312121  | VCV000223389      | NC_000002.12:178546475:G:A         | NA     | 1     | NA    | 2.49E-06 | ClinVar | Nonsense              | Arg31619Ter         | 94855C>T          |
| 2:178549309:G:A | 2:179414036           | TTN    | rs794729301  | VCV000202424      | NC_000002.12:178549308:G:A         | NA     | 1     | NA    | 2.49E-06 | ClinVar | Nonsense              | Arg30773Ter         | 92317C>T          |
| 2:178553039:C:T | 2:179417766           | TTN    | rs1060500457 | VCV000404812      | NC_000002.12:178553038:C:T         | NA     | 1     | NA    | 2.49E-06 | ClinVar | Nonsense              | Trp29954Ter         | 89861G>A          |
| 2:178554094:G:A | 2:179418821           | TTN    | rs886038916  | VCV000263764      | NC_000002.12:178554093:G:A         | NA     | 1     | NA    | 2.49E-06 | ClinVar | Nonsense              | Arg29673Ter         | 89017C>T          |
| 2:178559309:A:T | 2:179424036           | TTN    | rs397517735  | VCV000047458      | NC_000002.12:178559308:A:T         | NA     | 1     | NA    | 2.49E-06 | ClinVar | Splice donor          | NA                  | 86821+2T>A        |
| 2:178560055:I:1 | 2:179424782-179424783 | TTN    | rs1285329277 | VCV000519013      | NC_000002.12:178560055:TTTTT:TTTTT | NA     | 1     | NA    | 2.49E-06 | ClinVar | Frameshift            | Ser28693fs          | 86076dup          |
| 2:178560364:G:A | 2:179425091           | TTN    | rs748689777  | VCV000488732      | NC_000002.12:178560363:G:A         | NA     | 1     | NA    | 2.49E-06 | ClinVar | Nonsense              | Arg28590Ter         | 85768C>T          |
| 2:178563607:G:A | 2:179428334           | TTN    | rs1575649368 | VCV000667023      | NC_000002.12:178563606:G:A         | NA     | 1     | NA    | 2.49E-06 | ClinVar | Nonsense              | Arg27509Ter         | 82525C>T          |
| 2:178563892:G:A | 2:179428619           | TTN    | rs766840243  | VCV000202415      | NC_000002.12:178563891:G:A         | NA     | 1     | NA    | 2.49E-06 | ClinVar | Nonsense              | Arg27414Ter         | 82240C>T          |
| 2:178566838:G:A | 2:179431565           | TTN    | rs774411587  | VCV000466659      | NC_000002.12:178566837:G:A         | NA     | 1     | NA    | 2.49E-06 | ClinVar | Nonsense              | Arg26432Ter         | 79294C>T          |
| 2:178570158:C:T | 2:179434885           | TTN    | rs1553602546 | VCV000518953      | NC_000002.12:178570157:C:T         | NA     | 1     | NA    | 2.49E-06 | ClinVar | Nonsense              | Trp25325Ter         | 75974G>A          |
| 2:178570882:G:A | 2:179435609           | TTN    | rs794729286  | VCV000202406      | NC_000002.12:178570881:G:A         | NA     | 1     | NA    | 2.49E-06 | ClinVar | Nonsense              | Arg25084Ter         | 75250C>T          |
| 2:178573462:D:1 | 2:179438190           | TTN    | rs727504531  | VCV000178908      | NC_000002.12:178573462:A:G         | NA     | 1     | NA    | 2.49E-06 | ClinVar | Frameshift            | Asp24224fs          | 72669del          |
| 2:178577762:C:T | 2:179442489           | TTN    | NA           | VCV000958293      | NC_000002.12:178577761:C:T         | NA     | 1     | NA    | 2.49E-06 | ClinVar | Nonsense              | Trp22888Ter         | 68664G>A          |



| SNP             | GRCh37                | Gene | rsID         | Accession ClinVar | Canonical SPDI                      | N ARVC | N DCM | N HCM | MAF      | Origin  | Molecular Consequence | Amino acid change    | Nucleotide change |
|-----------------|-----------------------|------|--------------|-------------------|-------------------------------------|--------|-------|-------|----------|---------|-----------------------|----------------------|-------------------|
| 2:17858452:G:A  | 2:179449279           | TTN  | rs794729280  | VCV000202399      | NC_000002.12:178584551:G:A          | NA     | 1     | NA    | 2.49E-06 | ClinVar | Nonsense              | Arg21667Ter          | 64999C>T          |
| 2:178587418:C:T | 2:179452145           | TTN  | NA           | VCV000948116      | NC_000002.12:178587417:C:T          | NA     | 1     | NA    | 2.49E-06 | ClinVar | Splice acceptor       | NA                   | 63794-1G>A        |
| 2:178590230:G:A | 2:179454957           | TTN  | rs869312112  | VCV000223377      | NC_000002.12:178590229:G:A          | NA     | 1     | NA    | 2.49E-06 | ClinVar | Nonsense              | Arg20499Ter          | 61495C>T          |
| 2:178593566:A:G | 2:179458293           | TTN  | rs869312054  | VCV000223287      | NC_000002.12:178593565:A:G          | NA     | 1     | NA    | 2.49E-06 | ClinVar | Splice donor          | NA                   | 58732+2T>C        |
| 2:178594198:G:A | 2:179458925           | TTN  | rs768073446  | VCV000432196      | NC_000002.12:178594197:G:A          | NA     | 1     | NA    | 2.49E-06 | VKGL    | Nonsense              | Arg19399Ter          | 58195C>T          |
| 2:178595636:G:A | 2:179460363           | TTN  | NA           | VCV000839183      | NC_000002.12:178595635:G:A          | NA     | 1     | NA    | 2.49E-06 | ClinVar | Nonsense              | Arg19240Ter          | 57718C>T          |
| 2:178597751:G:A | 2:179462478           | TTN  | rs72646831   | VCV000047121      | NC_000002.12:178597750:G:A          | NA     | 1     | NA    | 2.49E-06 | ClinVar | Nonsense              | Arg19111Ter          | 57331C>T          |
| 2:178599145:C:T | 2:179463872           | TTN  | rs397517624  | VCV000047113      | NC_000002.12:178599144:C:T          | NA     | 1     | NA    | 2.49E-06 | ClinVar | Splice donor          | NA                   | 56647+1G>A        |
| 2:178601739:G:A | 2:179466466           | TTN  | NA           | VCV000958943      | NC_000002.12:178601738:G:A          | NA     | 1     | NA    | 2.49E-06 | ClinVar | Nonsense              | Arg18451Ter          | 55351C>T          |
| 2:178604269:G:A | 2:179468996           | TTN  | rs747236787  | VCV000579797      | NC_000002.12:178604268:G:A          | NA     | 1     | NA    | 2.49E-06 | ClinVar | Nonsense              | Arg18140Ter          | 54418C>T          |
| 2:178605110:G:A | 2:179469837           | TTN  | rs1553682168 | VCV000466638      | NC_000002.12:178605109:G:A          | NA     | 1     | NA    | 2.49E-06 | ClinVar | Nonsense              | Arg18023Ter          | 54067C>T          |
| 2:178605552:G:A | 2:179470279           | TTN  | rs753333359  | VCV000534995      | NC_000002.12:178605551:G:A          | NA     | 1     | NA    | 2.49E-06 | ClinVar | Nonsense              | Arg17915Ter          | 53743C>T          |
| 2:178608700:I:A | 2:179473427-179473428 | TTN  | rs794729323  | VCV000202450      | NC_000002.12:178608700:TCAATCA:TCAA | NA     | 1     | NA    | 2.49E-06 | ClinVar | Nonsense              | Glu17437delinsAspTer | 52307 52310dup    |
| 2:178610089:C:T | 2:179474816           | TTN  | rs761807131  | VCV000202384      | NC_000002.12:178610088:C:T          | NA     | 1     | NA    | 2.49E-06 | ClinVar | Splice donor          | NA                   | 51436+1G>A        |
| 2:178610090:G:A | 2:179474817           | TTN  | rs906494713  | VCV000691694      | NC_000002.12:178610089:G:A          | NA     | 1     | NA    | 2.49E-06 | ClinVar | Nonsense              | Gln17146Ter          | 51436C>T          |
| 2:178612115:G:A | 2:179476842           | TTN  | rs754866489  | VCV000202379      | NC_000002.12:178612114:G:A          | NA     | 1     | NA    | 2.49E-06 | ClinVar | Nonsense              | Arg16766Ter          | 50296C>T          |
| 2:178612355:G:A | 2:179477082           | TTN  | rs794729265  | VCV000202378      | NC_000002.12:178612354:G:A          | NA     | 1     | NA    | 2.49E-06 | ClinVar | Nonsense              | Arg16724Ter          | 50170C>T          |
| 2:178614226:G:A | 2:179478953           | TTN  | rs570046043  | VCV000636978      | NC_000002.12:178614225:G:A          | NA     | 1     | NA    | 2.49E-06 | ClinVar | Nonsense              | Arg16391Ter          | 49171C>T          |
| 2:178622684:G:A | 2:179487411           | TTN  | rs727505350  | VCV000180102      | NC_000002.12:178622683:G:A          | NA     | 1     | NA    | 2.49E-06 | VKGL    | Nonsense              | Arg14967Ter          | 44899C>T          |
| 2:178629441:G:A | 2:179494168           | TTN  | rs770767998  | VCV000223369      | NC_000002.12:178629440:G:A          | NA     | 1     | NA    | 2.49E-06 | VKGL    | Nonsense              | Arg14762Ter          | 44284C>T          |
| 2:178630250:G:A | 2:179494977           | TTN  | rs140743001  | VCV000202367      | NC_000002.12:178630249:G:A          | NA     | 1     | NA    | 2.49E-06 | VKGL    | Nonsense              | Arg14758Ter          | 44272C>T          |
| 2:178678746:C:T | 2:179543473           | TTN  | rs1389908421 | VCV000522785      | NC_000002.12:178678745:C:T          | NA     | 1     | NA    | 2.49E-06 | ClinVar | Splice donor          | NA                   | 33826+1G>A        |
| 2:178740125:G:A | 2:179604852           | TTN  | rs267607158  | VCV000012657      | NC_000002.12:178740124:G:A          | NA     | 1     | NA    | 2.49E-06 | ClinVar | Nonsense              | Gln4370Ter           | 13108C>T          |
| 2:178770483:D:2 | 2:179635211-179635212 | TTN  | rs869312037  | VCV000223266      | NC_000002.12:178770483:CACA:CA      | NA     | 1     | NA    | 2.49E-06 | ClinVar | Frameshift            | Ala2770fs            | 8307 8308del      |
| 2:178786129:T:A | 2:179650856           | TTN  | rs1554023044 | VCV000518936      | NC_000002.12:178786128:T:A          | NA     | 1     | NA    | 2.49E-06 | ClinVar | Nonsense              | Lys697Ter            | 2089A>T           |
| 2:219418463:A:G | 2:220283185           | DES  | rs1057523274 | VCV000388926      | NC_000002.12:219418462:A:G          | 1      | 1     | NA    | 2.49E-06 | ClinVar | Missense              | Met1Val              | 1A>G              |
| 6:118559037:T:G | 6:118880200           | PLN  | rs111033560  | VCV000013637      | NC_000006.12:118559036:T:G          | 1      | 1     | NA    | 2.49E-06 | ClinVar | Nonsense              | Leu39Ter             | 116T>G            |
| 6:7555797:C:T   | 6:7556030             | DSP  | rs768521444  | VCV000451211      | NC_000006.12:7555796:C:T            | 1      | 1     | NA    | 2.49E-06 | ClinVar | Nonsense              | Arg84Ter             | 250C>T            |
| 6:7558155:C:T   | 6:7558388             | DSP  | NA           | VCV000853704      | NC_000006.12:7558154:C:T            | 1      | 1     | NA    | 2.49E-06 | ClinVar | Nonsense              | Arg105Ter            | 313C>T            |
| 6:7559281:C:T   | 6:7559514             | DSP  | rs397516943  | VCV000044922      | NC_000006.12:7559280:C:T            | 1      | 1     | NA    | 2.49E-06 | ClinVar | Nonsense              | Arg160Ter            | 478C>T            |
| 6:7568448:I:1   | 6:7568681-7568682     | DSP  | rs1561687796 | VCV000565816      | NC_000006.12:7568448:AAAA:AAAAA     | 1      | NA    | NA    | 2.49E-06 | ClinVar | Frameshift            | Ile428fs             | 1282dup           |
| 6:7568458:G:T   | 6:7568691             | DSP  | NA           | VCV000857798      | NC_000006.12:7568457:G:T            | 1      | 1     | NA    | 2.49E-06 | ClinVar | Nonsense              | Glu430Ter            | 1288G>T           |
| 6:7568521:C:G   | 6:7568754             | DSP  | NA           | VCV000948761      | NC_000006.12:7568520:C:G            | NA     | 1     | NA    | 2.49E-06 | ClinVar | Missense              | Arg451Gly            | 1351C>G           |
| 6:7571554:C:T   | 6:7571787             | DSP  | rs876657638  | VCV000228253      | NC_000006.12:7571553:C:T            | 1      | 1     | NA    | 2.49E-06 | ClinVar | Nonsense              | Gln625Ter            | 1873C>T           |
| 6:7574797:T:C   | 6:7575030             | DSP  | rs774514264  | VCV000388661      | NC_000006.12:7574796:T:C            | 1      | 1     | NA    | 2.49E-06 | ClinVar | Splice donor          | NA                   | 2436+2T>C         |
| 6:7579385:C:G   | 6:7579618             | DSP  | rs886039178  | VCV000264512      | NC_000006.12:7579384:C:G            | 1      | 1     | NA    | 2.49E-06 | ClinVar | Nonsense              | Tyr1065Ter           | 3195C>G           |
| 6:7580370:C:T   | 6:7580603             | DSP  | rs140474226  | VCV000162505      | NC_000006.12:7580369:C:T            | 1      | 1     | NA    | 2.49E-06 | ClinVar | Nonsense              | Gln1394Ter           | 4180C>T           |
| 6:7580721:C:T   | 6:7580954             | DSP  | rs397516940  | VCV000044914      | NC_000006.12:7580720:C:T            | 1      | 1     | NA    | 2.49E-06 | ClinVar | Nonsense              | Gln1511Ter           | 4531C>T           |
| 6:7581402:C:T   | 6:7581635             | DSP  | rs794728124  | VCV000199890      | NC_000006.12:7581401:C:T            | 1      | 1     | NA    | 2.49E-06 | ClinVar | Nonsense              | Arg1738Ter           | 5212C>T           |
| 6:7583740:C:T   | 6:7583973             | DSP  | rs777573018  | VCV000199902      | NC_000006.12:7583739:C:T            | 1      | 1     | NA    | 2.49E-06 | ClinVar | Nonsense              | Arg2160Ter           | 6478C>T           |
| 6:7584904:C:T   | 6:7585137             | DSP  | NA           | VCV000984931      | NC_000006.12:7584903:C:T            | 1      | 1     | NA    | 2.49E-06 | ClinVar | Nonsense              | Arg2548Ter           | 7642C>T           |
| 7:128841304:C:T | 7:128481358           | FLNC | rs770606675  | VCV000421215      | NC_000007.14:128841303:C:T          | NA     | 1     | NA    | 2.49E-06 | ClinVar | Nonsense              | Arg650Ter            | 1948C>T           |
| 7:128846396:C:T | 7:128486450           | FLNC | rs138193236  | VCV000070588      | NC_000007.14:128846395:C:T          | NA     | 1     | NA    | 2.49E-06 | ClinVar | Nonsense              | Arg1354Ter           | 4060C>T           |
| 7:128853750:C:T | 7:128493804           | FLNC | rs1186464414 | VCV000539432      | NC_000007.14:128853749:C:T          | NA     | 1     | NA    | 2.49E-06 | VKGL    | Missense              | Arg2133Cys           | 6397C>T           |
| 7:128854661:C:T | 7:128494715           | FLNC | rs748416758  | VCV000478129      | NC_000007.14:128854660:C:T          | NA     | 1     | NA    | 2.49E-06 | ClinVar | Nonsense              | Arg2326Ter           | 6976C>T           |

Abbreviations:

ARVC: arrhythmic right ventricular cardiomyopathy; DCM: dilated cardiomyopathy; HCM: hypertrophic cardiomyopathy; MAF: minor allele frequency; N: number of carriers.

| Supplementary Table V: Prevalence of all genes per cardiomyopathy |               |      |            |            |
|-------------------------------------------------------------------|---------------|------|------------|------------|
| Cardiomyopathy                                                    | Gene          | N    | Proportion | Prevalence |
| ARVC                                                              | <i>DES</i>    | 15   | 4.3        | 7.48E-05   |
|                                                                   | <i>DSC2</i>   | 42   | 12.1       | 2.09E-04   |
|                                                                   | <i>DSG2</i>   | 31   | 8.9        | 1.55E-04   |
|                                                                   | <i>DSP</i>    | 49   | 14.1       | 2.44E-04   |
|                                                                   | <i>JUP</i>    | 24   | 6.9        | 1.20E-04   |
|                                                                   | <i>PKP2</i>   | 185  | 53.3       | 9.22E-04   |
|                                                                   | <i>PLN</i>    | 1    | 0.3        | 4.98E-06   |
| DCM                                                               | <i>ACTC1</i>  | 1    | 0.1        | 4.98E-06   |
|                                                                   | <i>ACTN2</i>  | 6    | 0.8        | 2.99E-05   |
|                                                                   | <i>BAG3</i>   | 15   | 1.9        | 7.48E-05   |
|                                                                   | <i>DES</i>    | 49   | 6.1        | 2.44E-04   |
|                                                                   | <i>DSP</i>    | 49   | 6.1        | 2.44E-04   |
|                                                                   | <i>FLNC</i>   | 56   | 7.0        | 2.79E-04   |
|                                                                   | <i>LMNA</i>   | 42   | 5.3        | 2.09E-04   |
|                                                                   | <i>MYH7</i>   | 158  | 19.8       | 7.87E-04   |
|                                                                   | <i>NEXN</i>   | 4    | 0.5        | 1.99E-05   |
|                                                                   | <i>PLN</i>    | 8    | 1.0        | 3.99E-05   |
|                                                                   | <i>RBM20</i>  | 5    | 0.6        | 2.49E-05   |
|                                                                   | <i>SCN5A</i>  | 59   | 7.4        | 2.94E-04   |
|                                                                   | <i>TNNC1</i>  | 7    | 0.9        | 3.49E-05   |
|                                                                   | <i>TNNI3</i>  | 35   | 4.4        | 1.74E-04   |
|                                                                   | <i>TNNT2</i>  | 32   | 4.0        | 1.59E-04   |
|                                                                   | <i>TPM1</i>   | 2    | 0.3        | 9.97E-06   |
| <i>TTN</i>                                                        | 272           | 34.0 | 1.36E-03   |            |
| HCM                                                               | <i>ACTC1</i>  | 1    | 0.1        | 4.98E-06   |
|                                                                   | <i>CSRP3</i>  | 27   | 2.0        | 1.35E-04   |
|                                                                   | <i>JPH2</i>   | 6    | 0.4        | 2.99E-05   |
|                                                                   | <i>MYBPC3</i> | 723  | 53.6       | 3.60E-03   |
|                                                                   | <i>MYH7</i>   | 232  | 17.2       | 1.16E-03   |
|                                                                   | <i>MYL2</i>   | 21   | 1.6        | 1.05E-04   |
|                                                                   | <i>MYL3</i>   | 1    | 0.1        | 4.98E-06   |
|                                                                   | <i>TNNC1</i>  | 7    | 0.5        | 3.49E-05   |
|                                                                   | <i>TNNI3</i>  | 50   | 3.7        | 2.49E-04   |
|                                                                   | <i>TNNT2</i>  | 274  | 20.3       | 1.37E-03   |
| <i>TPM1</i>                                                       | 6             | 0.4  | 2.99E-05   |            |

Abbreviations:

*ACTC1*: Actin Alpha Cardiac Muscle 1; *ACTN2*: Alpha-actinin 2;  
*ARVC*: Arrhythmogenic right ventricular cardiomyopathy; *BAG3*: BAG Cochaperone 3;  
*CSRP3*: Cysteine And Glycine Rich Protein 3; *DCM*: Dilated cardiomyopathy; *DES*: Desmin;  
*DSC2*: Desmocollin 2; *DSG2*: Desmoglein 2; *DSP*: desmoplakin;  
*FLNC*: Filamin-C; *HCM*: Hypertrophic cardiomyopathy; *JPH2*: Junctophilin 2;  
*JUP*: Junction Plakoglobin; *LMNA*: Lamin A/C; *MYBPC3*: Myosin Binding Protein C3;  
*MYH7*: Myosin Heavy Chain 7; *MYL2*: Myosin Light Chain 2; *MYL3*: Myosin Light Chain 3;  
*N*: Number of individuals; *NEXN*: Nexilin F-Actin Binding Protein; *PKP2*: Plakophilin 2;  
*PLN*: phospholamban; *RBM20*: RNA Binding Motif Protein 20;  
*SCN5A*: Sodium Voltage-Gated Channel Alpha Subunit 5;  
*TNNC1*: Troponin C1, Slow Skeletal And Cardiac Type; *TNNI3*: Troponin I3, Cardiac Type;  
*TNNT2*: Troponin T2, Cardiac Type; *TPM1*: Tropomyosin 1; *TTN*: Titin.

| <b>Supplementary Table VI: Prevalence of variants associated with the inherited cardiomyopathies</b> |                                          |                                               |                                             |
|------------------------------------------------------------------------------------------------------|------------------------------------------|-----------------------------------------------|---------------------------------------------|
| <b>Cardiomyopathy</b>                                                                                | <b>Prevalence with overlapping genes</b> | <b>Prevalence without overlapping genes</b>   | <b>Previously reported prevalence range</b> |
| ARVC                                                                                                 | 1:578                                    | 1:712                                         | 1:143 - 1:1,706 <sup>13-15</sup>            |
| DCM                                                                                                  | 1:251                                    | 1:289 (ARVC overlap) /<br>1:354 (HCM overlap) | 1:33 - 1:526 <sup>16, 17</sup>              |
| HCM                                                                                                  | 1:149                                    | 1:260                                         | 1:164 <sup>19</sup>                         |

Abbreviations:

ARVC: arrhythmogenic right ventricular cardiomyopathy; DCM: dilated cardiomyopathy; HCM: hypertrophic cardiomyopathy.

**Supplementary Table VII: Results of Fisher's Exact tests**

|                                    | ARVC G+ vs G- |         |         |          | DCM G+ vs G- |         |         |          | HCM G+ vs G- |         |         |          |
|------------------------------------|---------------|---------|---------|----------|--------------|---------|---------|----------|--------------|---------|---------|----------|
|                                    | OR            | 95% LCI | 95% UCI | p-value  | OR           | 95% LCI | 95% UCI | p-value  | OR           | 95% LCI | 95% UCI | p-value  |
| <b>CARDIOVASCULAR RISK FACTORS</b> |               |         |         |          |              |         |         |          |              |         |         |          |
| Diabetes                           | 1.112         | 0.755   | 1.592   | 0.570    | 0.833        | 0.626   | 1.091   | 0.200    | 1.280        | 1.061   | 1.537   | 0.008    |
| Hypertension                       | 0.962         | 0.760   | 1.212   | 0.774    | 1.072        | 0.919   | 1.248   | 0.374    | 1.045        | 0.925   | 1.179   | 0.482    |
| Hypercholesterolaemia              | 1.031         | 0.795   | 1.326   | 0.799    | 1.120        | 0.946   | 1.322   | 0.185    | 1.181        | 1.036   | 1.345   | 0.011    |
| Ever Smoked                        | 1.223         | 0.981   | 1.525   | 0.068    | 1.222        | 1.055   | 1.416   | 0.007    | 0.956        | 0.849   | 1.075   | 0.461    |
| Family heart disease               | 1.318         | 1.058   | 1.643   | 0.012    | 1.119        | 0.966   | 1.296   | 0.130    | 1.066        | 0.949   | 1.197   | 0.280    |
| <b>CARDIAC DISEASE/OUTCOME</b>     |               |         |         |          |              |         |         |          |              |         |         |          |
| Cardiac problem                    | 2.112         | 0.416   | 6.672   | 0.183    | 0.912        | 0.180   | 2.868   | 1.000    | 0.903        | 0.278   | 2.289   | 1.000    |
| Heart failure*                     | 1.432         | 0.639   | 2.812   | 0.305    | 2.534        | 1.708   | 3.671   | 5.05E-06 | 1.352        | 0.899   | 1.977   | 0.135    |
| Cardiomyopathy*                    | 2.341         | 0.460   | 7.452   | 0.150    | 7.590        | 4.242   | 13.283  | 6.94E-11 | 5.495        | 3.206   | 9.306   | 8.76E-10 |
| Phenotype positive†                | 1.325         | 0.351   | 3.547   | 0.550    | 3.664        | 2.236   | 5.813   | 4.88E-07 | 3.033        | 1.979   | 4.560   | 5.76E-07 |
| Dilated cardiomyopathy*            | 4.122         | 0.453   | 18.056  | 0.099    | 8.090        | 3.078   | 20.130  | 2.08E-05 | 0.529        | 0.013   | 3.481   | 1.000    |
| Hypertrophic cardiomyopathy*       | 3.599         | 0.081   | 26.974  | 0.265    | 10.989       | 3.383   | 34.746  | 4.60E-05 | 18.775       | 7.903   | 49.429  | 3.41E-13 |
| Ventricular arrhythmias            | 6.198         | 2.297   | 14.376  | 3.27E-04 | 4.974        | 2.392   | 9.752   | 1.93E-05 | 1.801        | 0.717   | 3.987   | 0.143    |
| Atrial arrhythmias                 | 1.054         | 0.415   | 2.239   | 0.841    | 2.273        | 1.518   | 3.314   | 8.18E-05 | 1.247        | 0.826   | 1.830   | 0.250    |
| Heart arrhythmia                   | 3.231         | 1.128   | 7.573   | 0.015    | 2.796        | 1.356   | 5.321   | 0.003    | 0.547        | 0.144   | 1.488   | 0.310    |
| Chronic ischemic heart disease*    | 1.431         | 0.971   | 2.052   | 0.059    | 1.281        | 0.981   | 1.652   | 0.058    | 0.947        | 0.748   | 1.186   | 0.695    |
| Acute myocardial infarction        | 1.467         | 0.801   | 2.494   | 0.151    | 1.134        | 0.730   | 1.697   | 0.519    | 0.892        | 0.610   | 1.270   | 0.606    |
| Cardiac arrest                     | 0.000         | 0.000   | 3.299   | 0.630    | 2.209        | 0.756   | 5.343   | 0.118    | 1.090        | 0.332   | 2.808   | 0.804    |
| Angina pectoris                    | 1.497         | 0.835   | 2.506   | 0.120    | 1.206        | 0.795   | 1.772   | 0.344    | 1.344        | 0.987   | 1.803   | 0.049    |
| Conduction disorders               | 1.535         | 0.645   | 3.137   | 0.260    | 1.497        | 0.859   | 2.464   | 0.136    | 1.281        | 0.807   | 1.960   | 0.242    |
| Valvular disease                   | 1.322         | 0.645   | 2.439   | 0.373    | 1.958        | 1.335   | 2.801   | 4.54E-04 | 1.269        | 0.883   | 1.782   | 0.163    |
| Congenital heart disease           | 2.059         | 0.237   | 8.219   | 0.267    | 1.337        | 0.260   | 4.342   | 0.499    | 1.059        | 0.269   | 3.033   | 0.788    |
| Pulmonary obstructive disease      | 1.490         | 0.940   | 2.266   | 0.078    | 1.198        | 0.860   | 1.634   | 0.240    | 0.848        | 0.629   | 1.125   | 0.280    |
| Cardiovascular death               | 1.771         | 0.860   | 3.286   | 0.100    | 1.673        | 1.038   | 2.588   | 0.030    | 0.733        | 0.423   | 1.197   | 0.268    |
| All-cause mortality                | 1.068         | 0.629   | 1.713   | 0.712    | 1.388        | 1.023   | 1.852   | 0.032    | 0.890        | 0.668   | 1.169   | 0.428    |

\* Used to define P+, therefore not included in some tests.

† Defined as diagnosis of cardiomyopathy, DCM, HCM or heart failure, in absence of chronic ischemic heart disease.

Abbreviations:

ARVC: arrhythmogenic right ventricular cardiomyopathy; DCM: dilated cardiomyopathy;

G+: carriers of likely pathogenic and pathogenic variants associated with one of the cardiomyopathies; HCM: hypertrophic cardiomyopathy;

LCI: lower limit confidence interval; UCI: upper limit confidence interval.

**Supplementary Table VII: Results of Fisher's Exact tests**

|                                    | strict HCM G+ vs G- |         |         |          | ARVC G+P- vs G-P- |         |         |         | DCM G+P- vs G-P- |         |         |         |
|------------------------------------|---------------------|---------|---------|----------|-------------------|---------|---------|---------|------------------|---------|---------|---------|
|                                    | OR                  | 95% LCI | 95% UCI | p-value  | OR                | 95% LCI | 95% UCI | p-value | OR               | 95% LCI | 95% UCI | p-value |
| <b>CARDIOVASCULAR RISK FACTORS</b> |                     |         |         |          |                   |         |         |         |                  |         |         |         |
| Diabetes                           | 0.802               | 0.601   | 1.055   | 0.124    | 1.108             | 0.749   | 1.594   | 0.566   | 0.860            | 0.645   | 1.130   | 0.296   |
| Hypertension                       | 1.093               | 0.938   | 1.273   | 0.246    | 0.954             | 0.752   | 1.205   | 0.728   | 1.032            | 0.882   | 1.207   | 0.694   |
| Hypercholesterolaemia              | 1.006               | 0.846   | 1.193   | 0.932    | 1.006             | 0.772   | 1.298   | 0.949   | 1.081            | 0.909   | 1.281   | 0.361   |
| Ever Smoked                        | 1.160               | 1.000   | 1.344   | 0.048    | 1.228             | 0.983   | 1.533   | 0.066   | 1.233            | 1.062   | 1.432   | 0.006   |
| Family heart disease               | 1.168               | 1.008   | 1.352   | 0.035    | 1.286             | 1.031   | 1.605   | 0.024   | 1.134            | 0.976   | 1.316   | 0.099   |
| <b>CARDIAC DISEASE/OUTCOME</b>     |                     |         |         |          |                   |         |         |         |                  |         |         |         |
| Cardiac problem                    | 1.216               | 0.315   | 3.369   | 0.575    | 2.227             | 0.438   | 7.061   | 0.166   | 0.981            | 0.194   | 3.097   | 1.000   |
| Heart failure*                     | 1.733               | 1.086   | 2.661   | 0.015    | NA                | NA      | NA      | NA      | NA               | NA      | NA      | NA      |
| Cardiomyopathy*                    | 8.647               | 4.962   | 14.841  | 4.40E-13 | NA                | NA      | NA      | NA      | NA               | NA      | NA      | NA      |
| Phenotype positive†                | 4.727               | 3.028   | 7.216   | 8.15E-11 | NA                | NA      | NA      | NA      | NA               | NA      | NA      | NA      |
| Dilated cardiomyopathy*            | 0.000               | 0.000   | 3.756   | 0.619    | NA                | NA      | NA      | NA      | NA               | NA      | NA      | NA      |
| Hypertrophic cardiomyopathy*       | 30.258              | 12.586  | 79.971  | 3.68E-16 | NA                | NA      | NA      | NA      | NA               | NA      | NA      | NA      |
| Ventricular arrhythmias            | 3.038               | 1.208   | 6.738   | 0.010    | 5.846             | 1.976   | 14.398  | 0.001   | 3.426            | 1.352   | 7.682   | 0.005   |
| Atrial arrhythmias                 | 1.650               | 1.035   | 2.530   | 0.025    | 1.176             | 0.462   | 2.504   | 0.672   | 2.117            | 1.357   | 3.194   | 0.001   |
| Heart arrhythmia                   | 0.690               | 0.138   | 2.136   | 0.798    | 2.797             | 0.866   | 7.018   | 0.042   | 2.471            | 1.115   | 4.941   | 0.013   |
| Chronic ischemic heart disease*    | 0.885               | 0.649   | 1.187   | 0.477    | NA                | NA      | NA      | NA      | NA               | NA      | NA      | NA      |
| Acute myocardial infarction        | 0.917               | 0.562   | 1.425   | 0.828    | 1.476             | 0.806   | 2.511   | 0.149   | 1.121            | 0.715   | 1.689   | 0.586   |
| Cardiac arrest                     | 1.467               | 0.377   | 4.128   | 0.527    | 0.000             | 0.000   | 3.415   | 0.628   | 1.938            | 0.589   | 5.017   | 0.195   |
| Angina pectoris                    | 1.288               | 0.860   | 1.873   | 0.175    | 1.511             | 0.843   | 2.531   | 0.117   | 1.244            | 0.819   | 1.828   | 0.244   |
| Conduction disorders               | 1.241               | 0.674   | 2.126   | 0.454    | 1.650             | 0.693   | 3.379   | 0.165   | 1.364            | 0.740   | 2.342   | 0.274   |
| Valvular disease                   | 1.517               | 0.987   | 2.253   | 0.045    | 1.332             | 0.624   | 2.527   | 0.351   | 1.662            | 1.072   | 2.491   | 0.017   |
| Congenital heart disease           | 1.335               | 0.259   | 4.337   | 0.499    | 2.313             | 0.264   | 9.341   | 0.229   | 1.020            | 0.117   | 4.105   | 1.000   |
| Pulmonary obstructive disease      | 0.903               | 0.620   | 1.279   | 0.611    | 1.575             | 0.993   | 2.398   | 0.040   | 1.090            | 0.762   | 1.522   | 0.600   |
| Cardiovascular death               | 0.684               | 0.321   | 1.294   | 0.328    | 1.916             | 0.929   | 3.562   | 0.054   | 1.454            | 0.849   | 2.358   | 0.153   |
| All-cause mortality                | 1.097               | 0.783   | 1.505   | 0.562    | 1.134             | 0.668   | 1.820   | 0.611   | 1.277            | 0.920   | 1.738   | 0.123   |

\* Used to define P+, therefore not included in some tests.

† Defined as diagnosis of cardiomyopathy, DCM, HCM or heart failure, in absence of chronic ischemic heart disease.

Abbreviations:

ARVC: arrhythmogenic right ventricular cardiomyopathy; DCM: dilated cardiomyopathy;

G+: carriers of likely pathogenic and pathogenic variants associated with one of the cardiomyopathies; HCM: hypertrophic cardiomyopathy;

LCI: lower limit confidence interval; UCI: upper limit confidence interval.

| Supplementary Table VII: Results of Fisher's Exact tests |                  |         |         |         |                         |         |         |         |
|----------------------------------------------------------|------------------|---------|---------|---------|-------------------------|---------|---------|---------|
|                                                          | HCM G+P- vs G-P- |         |         |         | strict HCM G+P- vs G-P- |         |         |         |
|                                                          | OR               | 95% LCI | 95% UCI | p-value | OR                      | 95% LCI | 95% UCI | p-value |
| <b>CARDIOVASCULAR RISK FACTORS</b>                       |                  |         |         |         |                         |         |         |         |
| Diabetes                                                 | 1.301            | 1.075   | 1.566   | 0.006   | 0.806                   | 0.599   | 1.067   | 0.148   |
| Hypertension                                             | 1.022            | 0.903   | 1.155   | 0.733   | 1.051                   | 0.897   | 1.228   | 0.528   |
| Hypercholesterolaemia                                    | 1.179            | 1.032   | 1.344   | 0.014   | 0.991                   | 0.830   | 1.179   | 0.965   |
| Ever Smoked                                              | 0.968            | 0.859   | 1.090   | 0.591   | 1.187                   | 1.022   | 1.380   | 0.023   |
| Family heart disease                                     | 1.068            | 0.949   | 1.200   | 0.274   | 1.175                   | 1.012   | 1.364   | 0.032   |
| <b>CARDIAC DISEASE/OUTCOME</b>                           |                  |         |         |         |                         |         |         |         |
| Cardiac problem                                          | 0.967            | 0.297   | 2.460   | 1.000   | 1.320                   | 0.342   | 3.673   | 0.550   |
| Heart failure*                                           | NA               | NA      | NA      | NA      | NA                      | NA      | NA      | NA      |
| Cardiomyopathy*                                          | NA               | NA      | NA      | NA      | NA                      | NA      | NA      | NA      |
| Phenotype positive†                                      | NA               | NA      | NA      | NA      | NA                      | NA      | NA      | NA      |
| Dilated cardiomyopathy*                                  | NA               | NA      | NA      | NA      | NA                      | NA      | NA      | NA      |
| Hypertrophic cardiomyopathy*                             | NA               | NA      | NA      | NA      | NA                      | NA      | NA      | NA      |
| Ventricular arrhythmias                                  | 1.005            | 0.257   | 2.859   | 1.000   | 1.718                   | 0.438   | 4.892   | 0.306   |
| Atrial arrhythmias                                       | 1.143            | 0.723   | 1.741   | 0.504   | 1.431                   | 0.836   | 2.319   | 0.156   |
| Heart arrhythmia                                         | 0.579            | 0.152   | 1.577   | 0.403   | 0.741                   | 0.148   | 2.296   | 0.797   |
| Chronic ischemic heart disease*                          | NA               | NA      | NA      | NA      | NA                      | NA      | NA      | NA      |
| Acute myocardial infarction                              | 0.860            | 0.581   | 1.235   | 0.487   | 0.862                   | 0.516   | 1.366   | 0.583   |
| Cardiac arrest                                           | 1.143            | 0.348   | 2.954   | 0.799   | 1.561                   | 0.401   | 4.405   | 0.339   |
| Angina pectoris                                          | 1.378            | 1.011   | 1.849   | 0.038   | 1.341                   | 0.894   | 1.950   | 0.136   |
| Conduction disorders                                     | 1.071            | 0.632   | 1.724   | 0.713   | 0.910                   | 0.425   | 1.734   | 1.000   |
| Valvular disease                                         | 1.145            | 0.765   | 1.665   | 0.486   | 1.245                   | 0.751   | 1.966   | 0.313   |
| Congenital heart disease                                 | 1.207            | 0.305   | 3.503   | 0.770   | 1.545                   | 0.298   | 5.079   | 0.451   |
| Pulmonary obstructive disease                            | 0.844            | 0.619   | 1.130   | 0.266   | 0.898                   | 0.606   | 1.291   | 0.659   |
| Cardiovascular death                                     | 0.669            | 0.365   | 1.141   | 0.163   | 0.531                   | 0.210   | 1.125   | 0.105   |
| All-cause mortality                                      | 0.863            | 0.638   | 1.148   | 0.338   | 1.061                   | 0.742   | 1.481   | 0.729   |

\* Used to define P+, therefore not included in some tests.

† Defined as diagnosis of cardiomyopathy, DCM, HCM or heart failure, in absence of chronic ischemic heart disease.

Abbreviations:

ARVC: arrhythmogenic right ventricular cardiomyopathy; DCM: dilated cardiomyopathy;

G+: carriers of likely pathogenic and pathogenic variants associated with one of the cardiomyopathies; HCM: hypertrophic cardiomyopathy;

LCI: lower limit confidence interval; UCI: upper limit confidence interval.

**Supplementary Table VIII: P-values of Mann-Whitney U tests**

|                                            | ARVC G+ vs G- | DCM G+ vs G- | HCM G+ vs G- | strict HCM* G+ vs G- |
|--------------------------------------------|---------------|--------------|--------------|----------------------|
| <b>CARDIOVASCULAR RISK FACTORS</b>         |               |              |              |                      |
| BMI                                        | 0.990         | 0.812        | 0.271        | 0.621                |
| Mean systolic blood pressure               | 0.774         | 0.901        | 0.258        | 0.508                |
| Mean diastolic blood pressure              | 0.341         | 0.734        | 0.997        | 0.776                |
| Total cholesterol                          | 0.369         | 0.844        | 0.242        | 0.666                |
| HDL                                        | 0.941         | 0.357        | 0.076        | 0.161                |
| LDL                                        | 0.214         | 0.898        | 0.484        | 0.778                |
| MET minutes per week for walking           | 0.545         | 0.055        | 0.233        | 0.017                |
| MET minutes per week for moderate activity | 0.950         | 0.913        | 0.578        | 0.155                |
| MET minutes per week for vigorous activity | 0.352         | 0.963        | 0.350        | 0.589                |
| Total MET minutes per week                 | 0.278         | 0.619        | 0.980        | 0.052                |
| <b>ECG MEASUREMENTS</b>                    |               |              |              |                      |
| P duration                                 | NA            | NA           | NA           | NA                   |
| P axis                                     | NA            | NA           | NA           | NA                   |
| PQ interval                                | NA            | NA           | NA           | NA                   |
| QRS duration                               | NA            | NA           | NA           | NA                   |
| R axis                                     | NA            | NA           | NA           | NA                   |
| QTC interval                               | NA            | NA           | NA           | NA                   |
| T axis                                     | NA            | NA           | NA           | NA                   |
| <b>CMR MEASUREMENTS</b>                    |               |              |              |                      |
| RVEDVi                                     | NA            | NA           | NA           | NA                   |
| RVESVi                                     | NA            | NA           | NA           | NA                   |
| RVSv                                       | NA            | NA           | NA           | NA                   |
| RVSVi                                      | NA            | NA           | NA           | NA                   |
| RVEF                                       | NA            | NA           | NA           | NA                   |
| RVPER                                      | NA            | NA           | NA           | NA                   |
| RVVFR                                      | NA            | NA           | NA           | NA                   |
| RVPAFR                                     | NA            | NA           | NA           | NA                   |
| LVEDVi                                     | NA            | NA           | NA           | NA                   |
| LVESVi                                     | NA            | NA           | NA           | NA                   |
| LVSv                                       | NA            | NA           | NA           | NA                   |
| LVSVi                                      | NA            | NA           | NA           | NA                   |
| LVEF                                       | NA            | NA           | NA           | NA                   |
| LVPER                                      | NA            | NA           | NA           | NA                   |
| LVVFR                                      | NA            | NA           | NA           | NA                   |
| LVPAFR                                     | NA            | NA           | NA           | NA                   |
| LVEDMi                                     | NA            | NA           | NA           | NA                   |
| LVMVR                                      | NA            | NA           | NA           | NA                   |
| LVEDV/RVEDV                                | NA            | NA           | NA           | NA                   |
| LVESV/RVESV                                | NA            | NA           | NA           | NA                   |
| peakEcc                                    | NA            | NA           | NA           | NA                   |
| TPKEcc                                     | NA            | NA           | NA           | NA                   |
| peakEII2Ch                                 | NA            | NA           | NA           | NA                   |
| TPKEII2Ch                                  | NA            | NA           | NA           | NA                   |
| peakEII4Ch                                 | NA            | NA           | NA           | NA                   |
| TPKEII4Ch                                  | NA            | NA           | NA           | NA                   |
| Wall thickness segment 1                   | NA            | NA           | NA           | NA                   |
| Wall thickness segment 2                   | NA            | NA           | NA           | NA                   |
| Wall thickness segment 3                   | NA            | NA           | NA           | NA                   |
| Wall thickness segment 4                   | NA            | NA           | NA           | NA                   |
| Wall thickness segment 5                   | NA            | NA           | NA           | NA                   |
| Wall thickness segment 6                   | NA            | NA           | NA           | NA                   |
| Wall thickness segment 7                   | NA            | NA           | NA           | NA                   |
| Wall thickness segment 8                   | NA            | NA           | NA           | NA                   |
| Wall thickness segment 9                   | NA            | NA           | NA           | NA                   |
| Wall thickness segment 10                  | NA            | NA           | NA           | NA                   |
| Wall thickness segment 11                  | NA            | NA           | NA           | NA                   |
| Wall thickness segment 12                  | NA            | NA           | NA           | NA                   |
| Wall thickness segment 13                  | NA            | NA           | NA           | NA                   |
| Wall thickness segment 14                  | NA            | NA           | NA           | NA                   |
| Wall thickness segment 15                  | NA            | NA           | NA           | NA                   |
| Wall thickness segment 16                  | NA            | NA           | NA           | NA                   |
| Global wall thickness                      | NA            | NA           | NA           | NA                   |
| Septal wall thickness                      | NA            | NA           | NA           | NA                   |
| Maximum wall thickness                     | NA            | NA           | NA           | NA                   |

\* strict HCM group: HCM group after excluding carriers of the 3628-41\_3628-17del *MYBPC3* and the Arg278Cys 862C>T *TNNT2* variant.

**Abbreviations:**

ARVC: arrhythmogenic right ventricular cardiomyopathy; BMI: body mass index; CMR: cardiac magnetic resonance imaging; DCM: dilated cardiomyopathy; ECG: Electrocardiography; EDVi: indexed end-diastolic volume; EDMi: indexed end-diastolic mass; EF: ejection fraction; ESVi: indexed end-systolic volume; G+: carriers of likely pathogenic and pathogenic variants associated with one of the cardiomyopathies; HCM: hypertrophic cardiomyopathy; HDL: high-density lipoprotein; LDL: low-density lipoprotein; LV: left ventricular; MET: metabolic equivalent of task; MVR: mass to volume ratio; PAFR: peak atrial filling rate; peakEcc: peak circumferential strain; peakEII2Ch: longitudinal strain analyzed in 2-chamber view; peakEII4Ch: longitudinal strain analyzed in 4-chamber view; PER: peak ejection rate; PFR: peak filling rate; RV: right ventricular; SVi: indexed stroke volume; TPKEcc: global time to peak circumferential strain; TPKEII2Ch: global time to longitudinal strain analyzed in 2-chamber view; TPKEII4Ch: global time to longitudinal strain analyzed in 4-chamber view.

Supplementary Table VIII: P-values of Mann-Whitney U tests

|                                            | ARVC G+P- vs G-P- | DCM G+P- vs G-P- | HCM G+P- vs G-P- | strict HCM* G+P- vs G-P- |
|--------------------------------------------|-------------------|------------------|------------------|--------------------------|
| <b>CARDIOVASCULAR RISK FACTORS</b>         |                   |                  |                  |                          |
| BMI                                        | 0.945             | 0.800            | 0.317            | 0.712                    |
| Mean systolic blood pressure               | 0.917             | 0.913            | 0.257            | 0.608                    |
| Mean diastolic blood pressure              | 0.367             | 0.760            | 0.934            | 0.737                    |
| Total cholesterol                          | 0.381             | 0.780            | 0.211            | 0.808                    |
| HDL                                        | 0.999             | 0.471            | 0.070            | 0.161                    |
| LDL                                        | 0.223             | 0.991            | 0.404            | 0.991                    |
| MET minutes per week for walking           | 0.500             | 0.084            | 0.189            | 0.010                    |
| MET minutes per week for moderate activity | 0.989             | 0.965            | 0.605            | 0.137                    |
| MET minutes per week for vigorous activity | 0.434             | 0.885            | 0.379            | 0.557                    |
| Total MET minutes per week                 | 0.290             | 0.722            | 0.943            | 0.038                    |
| <b>ECG MEASUREMENTS</b>                    |                   |                  |                  |                          |
| P duration                                 | 0.315             | 0.304            | 0.997            | 0.999                    |
| P axis                                     | 0.477             | 0.162            | 0.085            | 0.179                    |
| PQ interval                                | 0.617             | 0.989            | 0.527            | 0.904                    |
| QRS duration                               | 0.385             | 0.043            | 0.445            | 0.436                    |
| R axis                                     | 0.208             | 0.156            | 0.868            | 0.699                    |
| QTC interval                               | 0.255             | 0.422            | 0.300            | 0.270                    |
| T axis                                     | 0.818             | 0.572            | 0.074            | 0.128                    |
| <b>CMR MEASUREMENTS</b>                    |                   |                  |                  |                          |
| RVEDVi                                     | 0.780             | 0.058            | 0.177            | 0.722                    |
| RVESVi                                     | 0.707             | 0.287            | 0.051            | 0.118                    |
| RVSv                                       | 0.713             | 0.071            | 0.910            | 0.140                    |
| RVSVi                                      | 0.546             | 0.155            | 0.872            | 0.106                    |
| RVEF                                       | 0.950             | 0.765            | 0.025            | 0.015                    |
| RVPER                                      | 0.869             | 0.038            | 0.711            | 0.615                    |
| RVVPER                                     | 0.908             | 0.120            | 0.064            | 0.249                    |
| RVPAFR                                     | 0.661             | 0.385            | 0.192            | 0.025                    |
| LVEDVi                                     | 0.060             | 0.125            | 0.378            | 0.444                    |
| LVESVi                                     | 0.414             | 0.032            | 0.276            | 0.460                    |
| LVSv                                       | 0.100             | 0.509            | 0.889            | 0.214                    |
| LVSVi                                      | 0.052             | 0.430            | 0.921            | 0.318                    |
| LVEF                                       | 0.452             | 0.009            | 0.366            | 0.607                    |
| LVPER                                      | 0.465             | 0.023            | 0.190            | 0.420                    |
| LVVPER                                     | 0.114             | 0.436            | 0.567            | 0.485                    |
| LVPAFR                                     | 0.670             | 0.412            | 0.659            | 0.189                    |
| LVEDMi                                     | 0.800             | 0.738            | 0.928            | 0.188                    |
| LVMVR                                      | 0.295             | 0.061            | 0.784            | 0.559                    |
| LVEDV/RVEDV                                | 0.360             | 0.001            | 0.533            | 0.747                    |
| LVESV/RVESV                                | 0.904             | 0.000            | 0.585            | 0.027                    |
| peakEcc                                    | 0.319             | 0.107            | 0.643            | 0.812                    |
| TPKEcc                                     | 0.555             | 0.155            | 0.723            | 0.850                    |
| peakEII2Ch                                 | 0.751             | 0.019            | 0.751            | 0.179                    |
| TPKEII2Ch                                  | 0.616             | 0.701            | 0.978            | 0.314                    |
| peakEII4Ch                                 | 0.483             | 0.009            | 0.079            | 0.286                    |
| TPKEII4Ch                                  | 0.941             | 0.708            | 0.227            | 0.403                    |
| Wall thickness segment 1                   | 0.211             | 0.439            | 0.740            | 0.029                    |
| Wall thickness segment 2                   | 0.446             | 0.022            | 0.160            | 0.155                    |
| Wall thickness segment 3                   | 0.268             | 0.144            | 0.450            | 0.254                    |
| Wall thickness segment 4                   | 0.020             | 0.626            | 0.460            | 0.919                    |
| Wall thickness segment 5                   | 0.110             | 0.132            | 0.189            | 0.745                    |
| Wall thickness segment 6                   | 0.736             | 0.363            | 0.978            | 0.503                    |
| Wall thickness segment 7                   | 0.234             | 0.435            | 0.539            | 0.826                    |
| Wall thickness segment 8                   | 0.622             | 0.251            | 0.348            | 0.753                    |
| Wall thickness segment 9                   | 0.087             | 0.438            | 0.850            | 0.303                    |
| Wall thickness segment 10                  | 0.035             | 0.508            | 0.789            | 0.220                    |
| Wall thickness segment 11                  | 0.083             | 0.484            | 0.482            | 0.502                    |
| Wall thickness segment 12                  | 0.237             | 0.108            | 0.361            | 0.943                    |
| Wall thickness segment 13                  | 0.974             | 0.828            | 0.987            | 0.575                    |
| Wall thickness segment 14                  | 0.832             | 0.243            | 0.479            | 0.869                    |
| Wall thickness segment 15                  | 0.988             | 0.277            | 0.571            | 0.748                    |
| Wall thickness segment 16                  | 0.938             | 0.423            | 0.836            | 0.333                    |
| Global wall thickness                      | 0.159             | 0.232            | 0.961            | 0.270                    |
| Septal wall thickness                      | 0.229             | 0.071            | 0.523            | 0.174                    |
| Maximum wall thickness                     | 0.210             | 0.621            | 0.166            | 0.008                    |

\* strict HCM group: HCM group after excluding carriers of the 3628-41\_3628-17del *MYBPC3* and the Arg278Cys 862C>T *TNNT2* variant.

## Abbreviations:

ARVC: arrhythmogenic right ventricular cardiomyopathy; BMI: body mass index; CMR: cardiac magnetic resonance imaging; DCM: dilated cardiomyopathy; ECG: Electrocardiography; EDVi: indexed end-diastolic volume; EDMi: indexed end-diastolic mass; EF: ejection fraction; ESVi: indexed end-systolic volume; G+: carriers of likely pathogenic and pathogenic variants associated with one of the cardiomyopathies; HCM: hypertrophic cardiomyopathy; HDL: high-density lipoprotein; LDL: low-density lipoprotein; LV: left ventricular; MET: metabolic equivalent of task; MVR: mass to volume ratio; PAFR: peak atrial filling rate; peakEcc: peak circumferential strain; peakEII2Ch: longitudinal strain analyzed in 2-chamber view; peakEII4Ch: longitudinal strain analyzed in 4-chamber view; PER: peak ejection rate; PFR: peak filling rate; RV: right ventricular; SVi: indexed stroke volume; TPKEcc: global time to peak circumferential strain; TPKEII2Ch: global time to longitudinal strain analyzed in 2-chamber view; TPKEII4Ch: global time to longitudinal strain analyzed in 4-chamber view.



Supplementary Table IX: Extensive baseline table of P-CMR participants

|                                                                  | ARVC G+                       | DCM G+                      | HCM G+                      | Controls G-                 | Missing |
|------------------------------------------------------------------|-------------------------------|-----------------------------|-----------------------------|-----------------------------|---------|
| <b>n</b>                                                         | 33                            | 87                          | 130                         | 986                         |         |
| <b>Sex = Female (%)</b>                                          | 19 (57.6)                     | 46 (52.9)                   | 62 (47.7)                   | 486 (49.3)                  | 0       |
| <b>Age (median [IQR])</b>                                        | 54.00 [50.00, 61.00]          | 55.00 [50.00, 59.50]        | 54.00 [48.00, 60.00]        | 55.00 [49.00, 60.00]        | 0       |
| <b>Ethnicity (%)</b>                                             |                               |                             |                             |                             | 0       |
| Asian                                                            | 0 (0.0)                       | 1 (1.1)                     | 18 (13.8)                   | 76 (7.7)                    |         |
| Black                                                            | 0 (0.0)                       | 1 (1.1)                     | 2 (1.5)                     | 2 (0.2)                     |         |
| Chinese                                                          | 1 (3.0)                       | 1 (1.1)                     | 1 (0.8)                     | 9 (0.9)                     |         |
| Mixed                                                            | 0 (0.0)                       | 1 (1.1)                     | 5 (3.8)                     | 15 (1.5)                    |         |
| Other                                                            | 0 (0.0)                       | 0 (0.0)                     | 1 (0.8)                     | 5 (0.5)                     |         |
| White                                                            | 32 (97.0)                     | 83 (95.4)                   | 103 (79.2)                  | 879 (89.1)                  |         |
| <b>CARDIOVASCULAR RISK FACTORS</b>                               |                               |                             |                             |                             |         |
| <b>BMI (median [IQR])</b>                                        | 26.10 [24.23, 28.72]          | 26.27 [23.68, 29.11]        | 26.07 [23.82, 28.82]        | 25.84 [23.58, 28.62]        | 0       |
| <b>Diabetes (%)</b>                                              | 2 (6.1)                       | 7 (8.0)                     | 12 (9.2)                    | 78 (7.9)                    | 0       |
| <b>Hypertension (%)</b>                                          | 6 (18.2)                      | 27 (31.0)                   | 42 (32.3)                   | 309 (31.3)                  | 0       |
| <b>Mean systolic blood pressure (median [IQR])</b>               | 131.00 [117.50, 141.00]       | 134.50 [120.75, 146.75]     | 133.00 [122.00, 146.50]     | 133.50 [122.00, 146.00]     | 0.2     |
| <b>Mean diastolic blood pressure (median [IQR])</b>              | 79.50 [73.00, 86.50]          | 80.25 [74.50, 87.38]        | 81.50 [76.00, 87.50]        | 81.00 [74.50, 87.00]        | 0.2     |
| <b>Hypercholesterolaemia (%)</b>                                 | 9 (27.3)                      | 26 (29.9)                   | 45 (34.6)                   | 269 (27.3)                  | 0       |
| <b>Total cholesterol (median [IQR])</b>                          | 5.39 [4.92, 6.09]             | 5.51 [4.76, 6.34]           | 5.66 [4.85, 6.48]           | 5.63 [4.94, 6.44]           | 3.5     |
| <b>HDL (median [IQR])</b>                                        | 1.41 [1.12, 1.63]             | 1.42 [1.19, 1.61]           | 1.38 [1.14, 1.62]           | 1.40 [1.18, 1.71]           | 8.8     |
| <b>LDL (median [IQR])</b>                                        | 3.31 [3.00, 4.02]             | 3.45 [2.87, 4.13]           | 3.58 [2.89, 4.24]           | 3.50 [3.00, 4.11]           | 3.7     |
| <b>Ever Smoked (%)</b>                                           | 13 (39.4)                     | 45 (51.7)                   | 53 (40.8)                   | 397 (40.3)                  | 0       |
| <b>MET minutes per week for walking (median [IQR])</b>           | 693.00 [309.38, 1,386.00]     | 462.00 [198.00, 1,188.00]   | 495.00 [247.50, 1,039.50]   | 594.00 [247.50, 1,188.00]   | 14.3    |
| <b>MET minutes per week for moderate activity (median [IQR])</b> | 360.00 [90.00, 880.00]        | 570.00 [240.00, 960.00]     | 360.00 [160.00, 840.00]     | 360.00 [120.00, 1,080.00]   | 14.3    |
| <b>MET minutes per week for vigorous activity (median [IQR])</b> | 240.00 [0.00, 1,110.00]       | 280.00 [0.00, 960.00]       | 320.00 [0.00, 960.00]       | 288.00 [0.00, 960.00]       | 14.3    |
| <b>Total MET minutes per week (median [IQR])</b>                 | 1,840.50 [1,113.00, 2,447.25] | 1,483.00 [937.50, 3,097.50] | 1,436.00 [793.00, 2,559.00] | 1,737.00 [736.88, 3,352.50] | 14.3    |
| <b>Family heart disease (%)</b>                                  | 17 (51.5)                     | 47 (54.0)                   | 82 (61.2)                   | 542 (54.7)                  | 0       |
| <b>CARDIAC DISEASE/OUTCOME</b>                                   |                               |                             |                             |                             |         |
| <b>Cardiac problem (%)</b>                                       | 0 (0.0)                       | 1 (1.1)                     | 1 (0.8)                     | 6 (0.6)                     | 0       |
| <b>Heart failure (%)</b>                                         | 0 (0.0)                       | 0 (0.0)                     | 1 (0.8)                     | 5 (0.5)                     | 0       |
| <b>Cardiomyopathy (%)</b>                                        | 0 (0.0)                       | 0 (0.0)                     | 0 (0.0)                     | 0 (0.0)                     | 0       |
| <b>Dilated cardiomyopathy (%)</b>                                | 0 (0.0)                       | 0 (0.0)                     | 0 (0.0)                     | 0 (0.0)                     | 0       |
| <b>Hypertrophic cardiomyopathy (%)</b>                           | 0 (0.0)                       | 0 (0.0)                     | 0 (0.0)                     | 0 (0.0)                     | 0       |
| <b>Ventricular arrhythmias (%)</b>                               | 0 (0.0)                       | 0 (0.0)                     | 0 (0.0)                     | 2 (0.2)                     | 0       |
| <b>Atrial arrhythmias (%)</b>                                    | 0 (0.0)                       | 5 (5.7)                     | 3 (2.3)                     | 12 (1.2)                    | 0       |
| <b>Heart arrhythmia (%)</b>                                      | 1 (3.0)                       | 3 (3.4)                     | 0 (0.0)                     | 5 (0.5)                     | 0       |
| <b>Chronic ischemic heart disease (%)</b>                        | 2 (6.1)                       | 3 (3.4)                     | 3 (2.3)                     | 43 (4.4)                    | 0       |
| <b>Acute myocardial infarction (%)</b>                           | 0 (0.0)                       | 0 (0.0)                     | 1 (0.8)                     | 29 (2.9)                    | 0       |
| <b>Cardiac arrest (%)</b>                                        | 0 (0.0)                       | 0 (0.0)                     | 0 (0.0)                     | 1 (0.1)                     | 0       |
| <b>Angina pectoris (%)</b>                                       | 1 (3.0)                       | 2 (2.3)                     | 6 (4.6)                     | 18 (1.8)                    | 0       |
| <b>Conduction disorders (%)</b>                                  | 0 (0.0)                       | 0 (0.0)                     | 2 (1.5)                     | 10 (1.0)                    | 0       |
| <b>Valvular disease (%)</b>                                      | 0 (0.0)                       | 2 (2.3)                     | 0 (0.0)                     | 23 (2.3)                    | 0       |
| <b>Congenital heart disease (%)</b>                              | 0 (0.0)                       | 0 (0.0)                     | 0 (0.0)                     | 0 (0.0)                     | 0       |
| <b>Pulmonary obstructive disease (%)</b>                         | 2 (6.1)                       | 3 (3.4)                     | 4 (3.1)                     | 35 (3.5)                    | 0       |
| <b>Cardiovascular death (%)</b>                                  | 0 (0.0)                       | 0 (0.0)                     | 1 (0.8)                     | 3 (0.3)                     | 0       |
| <b>All-cause mortality (%)</b>                                   | 0 (0.0)                       | 1 (1.1)                     | 1 (0.8)                     | 12 (1.2)                    | 0       |
| <b>ECG MEASUREMENTS</b>                                          |                               |                             |                             |                             |         |
| <b>n (%)</b>                                                     | 29 (87.9)                     | 80 (92.0)                   | 110 (84.6)                  | 856 (86.8)                  | 0       |
| <b>P duration (median [IQR])</b>                                 | 100.00 [92.00, 110.00]        | 98.00 [86.00, 106.00]       | 100.00 [90.00, 107.00]      | 100.00 [90.00, 108.00]      | 16.3    |
| <b>P axis (median [IQR])</b>                                     | 54.00 [42.25, 61.50]          | 48.00 [36.00, 61.00]        | 49.00 [35.00, 62.50]        | 55.00 [41.00, 67.00]        | 37.4    |
| <b>PQ interval (median [IQR])</b>                                | 171.00 [147.00, 183.00]       | 165.00 [144.50, 176.00]     | 160.00 [146.00, 170.00]     | 160.00 [144.00, 178.00]     | 37.5    |
| <b>QRS duration (median [IQR])</b>                               | 88.00 [80.00, 94.00]          | 83.00 [78.00, 92.00]        | 84.00 [80.00, 92.00]        | 86.00 [80.00, 94.00]        | 13      |
| <b>R axis (median [IQR])</b>                                     | 23.50 [-1.75, 50.00]          | 27.50 [-2.50, 50.00]        | 40.00 [13.00, 54.00]        | 35.50 [8.00, 58.00]         | 35.4    |
| <b>QTc interval (median [IQR])</b>                               | 429.50 [403.25, 440.00]       | 422.00 [405.50, 435.75]     | 414.00 [401.00, 429.00]     | 416.00 [402.00, 432.00]     | 35.4    |
| <b>T axis (median [IQR])</b>                                     | 35.50 [20.25, 54.25]          | 42.00 [26.25, 57.00]        | 45.00 [31.00, 61.00]        | 40.00 [23.00, 55.75]        | 35.4    |
| <b>CMR MEASUREMENTS</b>                                          |                               |                             |                             |                             |         |
| <b>RVEDVi (median [IQR])</b>                                     | 79.14 [73.73, 92.49]          | 76.54 [69.50, 84.81]        | 77.12 [67.27, 90.71]        | 80.19 [70.61, 90.27]        | 8.4     |
| <b>RVESVi (median [IQR])</b>                                     | 35.16 [29.98, 38.71]          | 32.21 [27.10, 37.43]        | 31.40 [26.20, 37.28]        | 32.90 [27.42, 39.70]        | 8.4     |
| <b>RVSVi (median [IQR])</b>                                      | 87.13 [71.60, 106.86]         | 82.22 [69.02, 93.57]        | 86.09 [69.79, 105.70]       | 85.85 [72.77, 101.86]       | 8.4     |
| <b>RVSVi (median [IQR])</b>                                      | 48.22 [41.97, 52.24]          | 44.50 [40.75, 51.29]        | 45.77 [40.64, 54.04]        | 46.53 [40.91, 52.81]        | 8.4     |
| <b>RVEF (median [IQR])</b>                                       | 58.30 [53.30, 62.06]          | 59.31 [52.99, 62.59]        | 59.56 [54.80, 63.99]        | 58.37 [54.19, 62.74]        | 8.7     |
| <b>RVPER (median [IQR])</b>                                      | 405.50 [291.70, 489.35]       | 361.23 [290.08, 443.96]     | 389.50 [310.20, 475.80]     | 388.65 [316.52, 465.95]     | 8.4     |
| <b>RVPER (median [IQR])</b>                                      | 302.80 [225.65, 375.82]       | 295.76 [220.44, 343.18]     | 278.70 [230.80, 334.70]     | 300.30 [245.10, 363.40]     | 8.5     |
| <b>RVPAFR (median [IQR])</b>                                     | 274.70 [213.70, 343.90]       | 275.00 [224.92, 344.91]     | 300.10 [236.43, 366.40]     | 282.86 [222.52, 360.08]     | 8.4     |
| <b>LVEDVi (median [IQR])</b>                                     | 80.77 [73.11, 88.68]          | 77.32 [68.06, 86.15]        | 72.34 [64.33, 84.59]        | 74.37 [66.38, 83.15]        | 17.8    |
| <b>LVESVi (median [IQR])</b>                                     | 31.74 [25.91, 39.55]          | 31.69 [26.19, 39.84]        | 29.37 [24.09, 34.83]        | 30.02 [25.13, 35.72]        | 17.8    |
| <b>LVSv (median [IQR])</b>                                       | 91.46 [74.68, 102.10]         | 80.50 [68.12, 95.54]        | 82.92 [64.93, 100.22]       | 81.72 [70.11, 95.72]        | 17.6    |
| <b>LVSv (median [IQR])</b>                                       | 46.82 [43.25, 50.82]          | 43.18 [37.50, 49.11]        | 44.07 [38.21, 50.19]        | 44.06 [39.37, 50.29]        | 17.6    |
| <b>LVEF (median [IQR])</b>                                       | 59.69 [56.59, 66.23]          | 57.34 [52.60, 62.80]        | 59.74 [56.25, 63.62]        | 59.48 [55.29, 63.52]        | 17.8    |
| <b>LVPER (median [IQR])</b>                                      | 407.30 [307.20, 455.45]       | 339.21 [259.00, 430.80]     | 340.46 [264.61, 460.80]     | 373.80 [302.47, 453.27]     | 17.6    |
| <b>LVPER (median [IQR])</b>                                      | 346.20 [290.80, 422.04]       | 314.20 [258.81, 366.80]     | 320.25 [248.49, 371.20]     | 321.50 [259.92, 385.64]     | 17.6    |
| <b>LVPAFR (median [IQR])</b>                                     | 208.70 [158.60, 298.40]       | 253.35 [178.90, 330.36]     | 241.28 [167.28, 321.50]     | 233.50 [167.46, 305.10]     | 17.7    |
| <b>LVEDMi (median [IQR])</b>                                     | 42.81 [36.04, 48.38]          | 42.96 [36.56, 46.70]        | 42.41 [34.90, 49.27]        | 41.85 [36.55, 48.61]        | 17.7    |
| <b>LVMVr (median [IQR])</b>                                      | 0.55 [0.49, 0.60]             | 0.54 [0.49, 0.59]           | 0.56 [0.50, 0.64]           | 0.56 [0.50, 0.62]           | 17.6    |
| <b>LVEDV/RVEDV (median [IQR])</b>                                | 0.94 [0.90, 1.00]             | 1.00 [0.91, 1.08]           | 0.94 [0.86, 0.99]           | 0.93 [0.86, 1.03]           | 20.3    |
| <b>LVESV/RVESV (median [IQR])</b>                                | 0.91 [0.82, 1.05]             | 1.02 [0.89, 1.19]           | 0.90 [0.82, 1.02]           | 0.91 [0.80, 1.04]           | 20.3    |
| <b>peakEcc (median [IQR])</b>                                    | -22.87 [-26.91, -21.63]       | -22.67 [-24.40, -19.13]     | -22.91 [-25.18, -20.88]     | -22.72 [-24.98, -20.42]     | 36.2    |
| <b>TPKEcc (median [IQR])</b>                                     | 326.90 [318.44, 363.82]       | 334.75 [320.35, 360.47]     | 331.96 [308.18, 353.62]     | 331.30 [309.75, 354.70]     | 36.4    |
| <b>peakEII2Ch (median [IQR])</b>                                 | -21.37 [-23.84, -19.31]       | -20.29 [-22.24, -17.97]     | -21.54 [-23.50, -18.88]     | -21.17 [-23.32, -18.93]     | 37.3    |
| <b>TPKEII2Ch (median [IQR])</b>                                  | 346.80 [321.40, 370.50]       | 353.30 [330.98, 381.65]     | 353.10 [320.40, 379.60]     | 349.88 [321.78, 379.08]     | 37.4    |
| <b>peakEII4Ch (median [IQR])</b>                                 | -24.25 [-26.79, -21.38]       | -22.30 [-24.57, -19.76]     | -24.05 [-26.94, -22.28]     | -23.30 [-25.98, -21.37]     | 38.3    |
| <b>TPKEII4Ch (median [IQR])</b>                                  | 354.30 [328.00, 406.60]       | 354.80 [325.40, 392.55]     | 349.21 [318.52, 390.17]     | 357.30 [326.94, 397.80]     | 38.6    |
| <b>Wall thickness segment 1 (median [IQR])</b>                   | 7.05 [6.25, 8.57]             | 7.44 [6.78, 8.21]           | 7.59 [6.72, 8.55]           | 7.65 [6.81, 8.49]           | 31.6    |
| <b>Wall thickness segment 2 (median [IQR])</b>                   | 6.81 [5.24, 7.75]             | 6.03 [5.31, 7.39]           | 7.06 [5.87, 8.21]           | 6.75 [5.74, 7.90]           | 31.6    |
| <b>Wall thickness segment 3 (median [IQR])</b>                   | 5.58 [4.74, 7.16]             | 6.10 [4.85, 6.66]           | 6.22 [5.04, 7.39]           | 6.05 [5.17, 6.95]           | 31.6    |
| <b>Wall thickness segment 4 (median [IQR])</b>                   | 6.06 [5.49, 6.76]             | 6.57 [5.89, 6.99]           | 6.47 [5.85, 6.92]           | 6.54 [5.81, 7.21]           | 31.6    |
| <b>Wall thickness segment 5 (median [IQR])</b>                   | 5.96 [5.48, 6.40]             | 6.08 [5.57, 6.50]           | 6.03 [5.57, 6.64]           | 6.20 [5.62, 6.96]           | 31.6    |

|                                          | ARVC G+           | DCM G+            | HCM G+            | Controls G-       | Missing |
|------------------------------------------|-------------------|-------------------|-------------------|-------------------|---------|
| n                                        | 33                | 87                | 130               | 986               |         |
| Wall thickness segment 6 (median [IQR])  | 6.45 [6.15, 6.79] | 6.58 [6.05, 7.01] | 6.56 [5.93, 7.09] | 6.55 [5.97, 7.31] | 31.6    |
| Wall thickness segment 7 (median [IQR])  | 5.52 [5.21, 6.06] | 5.56 [5.28, 6.14] | 5.75 [5.21, 6.19] | 5.73 [5.29, 6.31] | 31.7    |
| Wall thickness segment 8 (median [IQR])  | 6.97 [6.44, 7.28] | 6.90 [6.27, 7.47] | 6.89 [6.16, 7.49] | 7.01 [6.28, 7.75] | 31.7    |
| Wall thickness segment 9 (median [IQR])  | 6.96 [6.18, 7.46] | 7.18 [6.64, 7.85] | 7.21 [6.38, 8.20] | 7.38 [6.48, 8.25] | 31.7    |
| Wall thickness segment 10 (median [IQR]) | 5.88 [5.33, 6.23] | 6.28 [5.90, 6.89] | 6.18 [5.44, 7.00] | 6.24 [5.60, 6.96] | 31.7    |
| Wall thickness segment 11 (median [IQR]) | 5.42 [4.96, 5.81] | 5.56 [5.08, 6.08] | 5.53 [5.02, 6.37] | 5.62 [5.10, 6.32] | 31.7    |
| Wall thickness segment 12 (median [IQR]) | 5.38 [5.17, 6.12] | 5.50 [5.14, 6.02] | 5.59 [5.08, 6.13] | 5.60 [5.22, 6.26] | 31.7    |
| Wall thickness segment 13 (median [IQR]) | 5.38 [5.24, 5.80] | 5.44 [5.13, 5.91] | 5.49 [5.12, 5.93] | 5.48 [5.10, 5.91] | 31.7    |
| Wall thickness segment 14 (median [IQR]) | 5.92 [5.41, 6.60] | 5.90 [5.44, 6.28] | 5.95 [5.38, 6.58] | 6.00 [5.36, 6.66] | 31.7    |
| Wall thickness segment 15 (median [IQR]) | 5.12 [4.78, 5.37] | 4.99 [4.56, 5.39] | 4.99 [4.44, 5.68] | 5.09 [4.48, 5.69] | 31.7    |
| Wall thickness segment 16 (median [IQR]) | 5.32 [4.86, 5.67] | 5.13 [4.82, 5.67] | 5.23 [4.76, 5.65] | 5.26 [4.80, 5.72] | 31.7    |
| Global wall thickness (median [IQR])     | 6.07 [5.57, 6.29] | 6.17 [5.90, 6.59] | 6.28 [5.70, 6.87] | 6.30 [5.72, 6.84] | 31.6    |
| Septal wall thickness (median [IQR])     | 6.43 [5.69, 7.01] | 6.37 [6.00, 6.90] | 6.62 [6.12, 7.52] | 6.67 [5.88, 7.34] | 31.7    |
| Maximum wall thickness (median [IQR])    | 7.81 [6.97, 8.59] | 8.01 [7.43, 8.66] | 8.16 [7.45, 9.58] | 8.09 [7.24, 9.01] | 31.7    |

Abbreviations:

ARVC: arrhythmogenic right ventricular cardiomyopathy; BMI: body mass index; CMR: cardiac magnetic resonance imaging; DCM: dilated cardiomyopathy; ECG: Electrocardiography; EDVi: indexed end-diastolic volume; EDMi: indexed end-diastolic mass; EF: ejection fraction; ESVi: indexed end-systolic volume; G+: carriers of likely pathogenic and pathogenic variants associated with one of the cardiomyopathies; HCM: hypertrophic cardiomyopathy; HDL: high-density lipoprotein; IQR: interquartile range; LDL: low-density lipoprotein; LV: left ventricular; MET: metabolic equivalent of task; MVR: mass to volume ratio; PAFR: peak atrial filling rate; peakEcc: peak circumferential strain; peakEII2Ch: longitudinal strain analyzed in 2-chamber view; peakEII4Ch: longitudinal strain analyzed in 4-chamber view; PER: peak ejection rate; PFR: peak filling rate; RV: right ventricular; SVi: indexed stroke volume; TPKEcc: global time to peak circumferential strain; TPKEII2Ch: global time to longitudinal strain analyzed in 2-chamber view; TPKEII4Ch: global time to longitudinal strain analyzed in 4-chamber view.

Supplementary Table X: Outcome risk stratified by cardiomyopathy and gene

| Phenotype                      | ARVC G+ vs G- |         |          |          | Gene | DCM G+ vs G- |         |          |         | Gene  | HCM G+ vs G- |         |          |          | Gene   |
|--------------------------------|---------------|---------|----------|----------|------|--------------|---------|----------|---------|-------|--------------|---------|----------|----------|--------|
|                                | OR            | 95% LCI | 95% UCI  | p-value  |      | OR           | 95% LCI | 95% UCI  | p-value |       | OR           | 95% LCI | 95% UCI  | p-value  |        |
| Heart failure                  | 8.270         | 0.900   | 36.898   | 0.030    |      | 0.000        | 0.000   | 2031.506 | 1.000   |       | 0.000        | 0.000   | 2031.506 | 1.000    |        |
| Cardiomyopathy                 | 19.151        | 0.442   | 132.223  | 0.056    |      | 0.000        | 0.000   | 9000.382 | 1.000   |       | 0.000        | 0.000   | 9000.382 | 1.000    |        |
| Heart failure + Cardiomyopathy | 7.476         | 0.814   | 33.321   | 0.036    |      | 0.000        | 0.000   | 1841.531 | 1.000   |       | 0.000        | 0.000   | 1841.531 | 1.000    |        |
| Phenotype positive             | 8.110         | 0.190   | 54.456   | 0.124    |      | 0.000        | 0.000   | 4144.720 | 1.000   |       | 0.000        | 0.000   | 4144.720 | 1.000    |        |
| Ventricular arrhythmias        | 0.000         | 0.000   | 88.063   | 1.000    |      | 0.000        | 0.000   | 9925.577 | 1.000   |       | 0.000        | 0.000   | 9925.577 | 1.000    |        |
| Atrial arrhythmias             | 3.657         | 0.086   | 24.275   | 0.253    | DES  | 0.000        | 0.000   | 1936.952 | 1.000   | ACTC1 | 0.000        | 0.000   | 1936.952 | 1.000    | ACTC1  |
| Heart arrhythmia               | 28.201        | 3.018   | 128.955  | 0.003    |      | 0.000        | 0.000   | 6442.674 | 1.000   |       | 0.000        | 0.000   | 6442.674 | 1.000    |        |
| Chronic ischemic heart disease | 3.188         | 0.576   | 11.850   | 0.091    |      | 0.000        | 0.000   | 493.649  | 1.000   |       | 0.000        | 0.000   | 493.649  | 1.000    |        |
| Angina pectoris                | 2.211         | 0.052   | 14.617   | 0.380    |      | 0.000        | 0.000   | 1185.278 | 1.000   |       | 0.000        | 0.000   | 1185.278 | 1.000    |        |
| Cardiovascular death           | 3.863         | 0.091   | 25.642   | 0.241    |      | 0.000        | 0.000   | 2042.573 | 1.000   |       | 0.000        | 0.000   | 2042.573 | 1.000    |        |
| All-cause mortality            | 2.836         | 0.310   | 12.580   | 0.179    |      | 0.000        | 0.000   | 711.200  | 1.000   |       | 0.000        | 0.000   | 711.200  | 1.000    |        |
| Heart failure                  | 1.312         | 0.032   | 7.822    | 0.540    |      | 10.751       | 0.226   | 96.809   | 0.105   |       | 0.000        | 0.000   | 7.948    | 1.000    |        |
| Cardiomyopathy                 | 0.000         | 0.000   | 25.853   | 1.000    |      | 0.000        | 0.000   | 235.208  | 1.000   |       | 0.000        | 0.000   | 41.147   | 1.000    |        |
| Heart failure + Cardiomyopathy | 1.186         | 0.029   | 7.061    | 0.576    |      | 9.715        | 0.205   | 87.209   | 0.116   |       | 0.000        | 0.000   | 7.178    | 1.000    |        |
| Phenotype positive             | 0.000         | 0.000   | 10.646   | 1.000    |      | 0.000        | 0.000   | 97.932   | 1.000   |       | 0.000        | 0.000   | 16.960   | 1.000    |        |
| Ventricular arrhythmias        | 0.000         | 0.000   | 29.170   | 1.000    |      | 0.000        | 0.000   | 264.754  | 1.000   |       | 0.000        | 0.000   | 46.435   | 1.000    |        |
| Atrial arrhythmias             | 0.000         | 0.000   | 4.745    | 1.000    | DSC2 | 0.000        | 0.000   | 43.769   | 1.000   | ACTN2 | 0.000        | 0.000   | 7.565    | 1.000    | CSR3P3 |
| Heart arrhythmia               | 4.479         | 0.109   | 27.435   | 0.207    |      | 0.000        | 0.000   | 159.535  | 1.000   |       | 0.000        | 0.000   | 27.753   | 1.000    |        |
| Chronic ischemic heart disease | 0.638         | 0.075   | 2.468    | 0.767    |      | 2.551        | 0.054   | 22.836   | 0.365   |       | 0.491        | 0.012   | 2.995    | 0.719    |        |
| Angina pectoris                | 0.755         | 0.019   | 4.480    | 1.000    |      | 0.000        | 0.000   | 26.400   | 1.000   |       | 0.000        | 0.000   | 4.558    | 1.000    |        |
| Cardiovascular death           | 1.319         | 0.032   | 7.866    | 0.538    |      | 10.812       | 0.227   | 97.361   | 0.105   |       | 0.000        | 0.000   | 7.993    | 1.000    |        |
| All-cause mortality            | 0.922         | 0.108   | 3.572    | 1.000    |      | 3.687        | 0.078   | 33.037   | 0.272   |       | 0.000        | 0.000   | 2.709    | 0.399    |        |
| Heart failure                  | 0.000         | 0.000   | 6.863    | 1.000    |      | 8.270        | 0.900   | 36.898   | 0.030   |       | 0.000        | 0.000   | 45.996   | 1.000    |        |
| Cardiomyopathy                 | 0.000         | 0.000   | 35.539   | 1.000    |      | 41.175       | 4.362   | 192.166  | 0.002   |       | 0.000        | 0.000   | 235.208  | 1.000    |        |
| Heart failure + Cardiomyopathy | 0.000         | 0.000   | 6.196    | 1.000    |      | 7.476        | 0.814   | 33.321   | 0.036   |       | 0.000        | 0.000   | 41.524   | 1.000    |        |
| Phenotype positive             | 0.000         | 0.000   | 14.641   | 1.000    |      | 17.455       | 1.885   | 78.723   | 0.008   |       | 0.000        | 0.000   | 97.932   | 1.000    |        |
| Ventricular arrhythmias        | 0.000         | 0.000   | 40.048   | 1.000    |      | 21.465       | 0.494   | 148.888  | 0.050   |       | 0.000        | 0.000   | 264.754  | 1.000    |        |
| Atrial arrhythmias             | 0.000         | 0.000   | 6.530    | 1.000    | DSG2 | 3.657        | 0.086   | 24.275   | 0.253   | BAG3  | 10.231       | 0.215   | 92.112   | 0.110    | JPH2   |
| Heart arrhythmia               | 0.000         | 0.000   | 23.957   | 1.000    |      | 13.101       | 0.305   | 89.207   | 0.080   |       | 0.000        | 0.000   | 159.535  | 1.000    |        |
| Chronic ischemic heart disease | 2.453         | 0.733   | 6.515    | 0.072    |      | 0.911        | 0.022   | 6.004    | 1.000   |       | 2.551        | 0.054   | 22.836   | 0.365    |        |
| Angina pectoris                | 2.135         | 0.246   | 8.503    | 0.254    |      | 0.000        | 0.000   | 8.675    | 1.000   |       | 15.464       | 1.394   | 108.566  | 0.014    |        |
| Cardiovascular death           | 0.000         | 0.000   | 6.902    | 1.000    |      | 3.863        | 0.091   | 25.642   | 0.241   |       | 0.000        | 0.000   | 46.258   | 1.000    |        |
| All-cause mortality            | 1.272         | 0.147   | 5.051    | 0.673    |      | 1.317        | 0.031   | 8.689    | 0.548   |       | 0.000        | 0.000   | 15.706   | 1.000    |        |
| Heart failure                  | 1.121         | 0.028   | 6.628    | 0.596    |      | 3.507        | 0.691   | 11.071   | 0.061   |       | 1.609        | 0.966   | 2.554    | 0.047    |        |
| Cardiomyopathy                 | 5.591         | 0.135   | 34.667   | 0.170    |      | 5.591        | 0.135   | 34.667   | 0.170   |       | 6.075        | 3.139   | 11.256   | 2.30E-07 |        |
| Heart failure + Cardiomyopathy | 2.068         | 0.242   | 7.995    | 0.261    |      | 3.170        | 0.625   | 9.992    | 0.077   |       | 2.547        | 1.720   | 3.681    | 4.50E-06 |        |
| Phenotype positive             | 4.833         | 0.560   | 18.977   | 0.070    |      | 2.367        | 0.058   | 14.183   | 0.352   |       | 3.732        | 2.234   | 6.010    | 9.20E-07 |        |
| Ventricular arrhythmias        | 0.000         | 0.000   | 24.850   | 1.000    |      | 12.800       | 1.448   | 52.549   | 0.013   |       | 2.097        | 0.637   | 5.428    | 0.180    |        |
| Atrial arrhythmias             | 0.000         | 0.000   | 4.042    | 1.000    | DSP  | 4.551        | 1.177   | 12.667   | 0.015   | DES   | 1.011        | 0.540   | 1.751    | 0.889    | MYBPC3 |
| Heart arrhythmia               | 0.000         | 0.000   | 14.836   | 1.000    |      | 7.811        | 0.897   | 31.194   | 0.031   |       | 0.509        | 0.060   | 1.939    | 0.588    |        |
| Chronic ischemic heart disease | 2.126         | 0.803   | 4.798    | 0.088    |      | 1.780        | 0.617   | 4.218    | 0.169   |       | 1.030        | 0.757   | 1.375    | 0.824    |        |
| Angina pectoris                | 2.752         | 0.714   | 7.618    | 0.068    |      | 0.645        | 0.016   | 3.797    | 1.000   |       | 1.294        | 0.846   | 1.913    | 0.188    |        |
| Cardiovascular death           | 2.302         | 0.269   | 8.907    | 0.225    |      | 1.127        | 0.028   | 6.666    | 0.594   |       | 0.529        | 0.209   | 1.118    | 0.366    |        |
| All-cause mortality            | 0.785         | 0.092   | 3.011    | 1.000    |      | 1.202        | 0.238   | 3.761    | 0.740   |       | 0.660        | 0.420   | 0.995    | 0.043    |        |
| Heart failure                  | 0.000         | 0.000   | 9.023    | 1.000    |      | 1.121        | 0.028   | 6.628    | 0.596   |       | 1.673        | 0.656   | 3.576    | 0.208    |        |
| Cardiomyopathy                 | 0.000         | 0.000   | 46.694   | 1.000    |      | 5.591        | 0.135   | 34.667   | 0.170   |       | 9.583        | 3.810   | 21.218   | 6.60E-06 |        |
| Heart failure + Cardiomyopathy | 0.000         | 0.000   | 8.143    | 1.000    |      | 2.068        | 0.242   | 7.995    | 0.261   |       | 3.360        | 1.814   | 5.798    | 1.20E-04 |        |
| Phenotype positive             | 0.000         | 0.000   | 19.247   | 1.000    |      | 4.833        | 0.560   | 18.977   | 0.070   |       | 5.116        | 2.338   | 10.038   | 6.80E-05 |        |
| Ventricular arrhythmias        | 0.000         | 0.000   | 52.650   | 1.000    |      | 0.000        | 0.000   | 24.850   | 1.000   | DSP   | 2.618        | 0.303   | 10.344   | 0.189    | MYH7   |
| Atrial arrhythmias             | 0.000         | 0.000   | 8.586    | 1.000    | JUP  | 0.000        | 0.000   | 4.042    | 1.000   |       | 1.829        | 0.769   | 3.740    | 0.094    |        |
| Heart arrhythmia               | 0.000         | 0.000   | 31.449   | 1.000    |      | 0.000        | 0.000   | 14.836   | 1.000   |       | 0.795        | 0.020   | 4.666    | 1.000    |        |
| Chronic ischemic heart disease | 0.555         | 0.013   | 3.425    | 1.000    |      | 2.126        | 0.803   | 4.798    | 0.088   |       | 1.008        | 0.573   | 1.665    | 0.899    |        |
| Angina pectoris                | 1.346         | 0.033   | 8.345    | 0.534    |      | 2.752        | 0.714   | 7.618    | 0.068   |       | 1.395        | 0.653   | 2.648    | 0.337    |        |
| Cardiovascular death           | 0.000         | 0.000   | 9.074    | 1.000    |      | 3.527        | 0.695   | 11.134   | 0.061   |       | 0.949        | 0.254   | 2.506    | 1.000    |        |
| All-cause mortality            | 0.000         | 0.000   | 3.074    | 0.633    |      | 1.202        | 0.238   | 3.761    | 0.740   |       | 1.458        | 0.827   | 2.413    | 0.135    |        |
| Heart failure                  | 1.502         | 0.476   | 3.637    | 0.395    |      | 3.044        | 0.603   | 9.532    | 0.084   |       | 0.000        | 0.000   | 10.428   | 1.000    |        |
| Cardiomyopathy                 | 1.467         | 0.036   | 8.797    | 0.501    |      | 0.000        | 0.000   | 19.186   | 1.000   |       | 0.000        | 0.000   | 53.909   | 1.000    |        |
| Heart failure + Cardiomyopathy | 1.638         | 0.586   | 3.700    | 0.281    |      | 2.751        | 0.545   | 8.603    | 0.105   |       | 0.000        | 0.000   | 9.415    | 1.000    |        |
| Phenotype positive             | 0.621         | 0.015   | 3.596    | 1.000    |      | 4.207        | 0.489   | 16.404   | 0.088   |       | 0.000        | 0.000   | 22.239   | 1.000    |        |
| Ventricular arrhythmias        | 11.900        | 4.383   | 27.862   | 6.40E-06 |      | 0.000        | 0.000   | 21.656   | 1.000   | FLNC  | 0.000        | 0.000   | 60.833   | 1.000    | MYL2   |
| Atrial arrhythmias             | 1.726         | 0.617   | 3.902    | 0.174    | PKP2 | 1.897        | 0.222   | 7.284    | 0.293   |       | 2.560        | 0.061   | 16.167   | 0.335    |        |
| Heart arrhythmia               | 3.044         | 0.603   | 9.522    | 0.084    |      | 0.000        | 0.000   | 12.921   | 1.000   |       | 0.000        | 0.000   | 36.379   | 1.000    |        |
| Chronic ischemic heart disease | 1.298         | 0.734   | 2.157    | 0.315    |      | 0.981        | 0.257   | 2.678    | 1.000   |       | 1.343        | 0.151   | 5.582    | 0.663    |        |
| Angina pectoris                | 1.224         | 0.481   | 2.606    | 0.522    |      | 0.000        | 0.000   | 2.121    | 0.422   |       | 1.548        | 0.037   | 9.738    | 0.488    |        |
| Cardiovascular death           | 2.139         | 0.836   | 4.591    | 0.086    |      | 2.003        | 0.235   | 7.700    | 0.272   |       | 0.000        | 0.000   | 10.487   | 1.000    |        |
| All-cause mortality            | 1.172         | 0.571   | 2.169    | 0.612    |      | 2.634        | 1.001   | 5.884    | 0.025   |       | 0.922        | 0.022   | 5.787    | 1.000    |        |
| Heart failure                  | 0.000         | 0.000   | 2031.506 | 1.000    |      | 1.312        | 0.032   | 7.822    | 0.540   |       | 0.000        | 0.000   | 2031.506 | 1.000    |        |
| Cardiomyopathy                 | 0.000         | 0.000   | 9000.382 | 1.000    |      | 0.000        | 0.000   | 25.853   | 1.000   |       | 0.000        | 0.000   | 9000.382 | 1.000    |        |
| Heart failure + Cardiomyopathy | 0.000         | 0.000   | 1841.531 | 1.000    |      | 1.186        | 0.029   | 7.061    | 0.576   |       | 0.000        | 0.000   | 1841.531 | 1.000    |        |
| Phenotype positive             | 0.000         | 0.000   | 4144.720 | 1.000    |      | 0.000        | 0.000   | 10.646   | 1.000   |       | 0.000        | 0.000   | 4144.720 | 1.000    |        |
| Ventricular arrhythmias        | 0.000         | 0.000   | 9925.577 | 1.000    |      | 15.041       | 1.692   | 62.322   | 0.009   |       | 0.000        | 0.000   | 9925.577 | 1.000    |        |
| Atrial arrhythmias             | 0.000         | 0.000   | 1936.952 | 1.000    | PLN  | 2.560        | 0.298   | 9.995    | 0.194   | LMNA  | 0.000        |         |          |          |        |

| Phenotype                      | ARVC G+ vs G- |         |          |         |      | DCM G+ vs G- |         |          |          |       | HCM G+ vs G- |         |          |          |      |
|--------------------------------|---------------|---------|----------|---------|------|--------------|---------|----------|----------|-------|--------------|---------|----------|----------|------|
|                                | OR            | 95% LCI | 95% UCI  | p-value | Gene | OR           | 95% LCI | 95% UCI  | p-value  | Gene  | OR           | 95% LCI | 95% UCI  | p-value  | Gene |
| Heart failure                  | 0.000         | 0.000   | 59.126   | 1.000   |      | 0.000        | 0.000   | 45.996   | 1.000    |       | 0.000        | 0.000   | 235.208  | 1.000    |      |
| Cardiomyopathy                 | 0.000         | 0.000   | 301.276  | 1.000   |      | 0.000        | 0.000   | 53.348   | 1.000    |       | 0.000        | 0.000   | 125.163  | 1.000    |      |
| Heart failure + Cardiomyopathy | 0.000         | 0.000   | 53.348   | 1.000   |      | 0.000        | 0.000   | 125.163  | 1.000    |       | 0.000        | 0.000   | 339.088  | 1.000    |      |
| Phenotype positive             | 0.000         | 0.000   | 125.163  | 1.000   |      | 0.000        | 0.000   | 56.235   | 1.000    | RBM20 | 0.000        | 0.000   | 264.754  | 1.000    | TPM1 |
| Ventricular arrhythmias        | 0.000         | 0.000   | 339.088  | 1.000   |      | 0.000        | 0.000   | 43.769   | 1.000    |       | 0.000        | 0.000   | 159.535  | 1.000    |      |
| Atrial arrhythmias             | 0.000         | 0.000   | 56.235   | 1.000   |      | 0.000        | 0.000   | 13.944   | 1.000    |       | 0.000        | 0.000   | 10.853   | 1.000    |      |
| Heart arrhythmia               | 0.000         | 0.000   | 204.364  | 1.000   |      | 0.000        | 0.000   | 33.910   | 1.000    |       | 0.000        | 0.000   | 26.400   | 1.000    |      |
| Chronic ischemic heart disease | 0.000         | 0.000   | 13.944   | 1.000   |      | 0.000        | 0.000   | 59.466   | 1.000    |       | 0.000        | 0.000   | 46.258   | 1.000    |      |
| Angina pectoris                | 0.000         | 0.000   | 33.910   | 1.000   |      | 0.000        | 0.000   | 20.179   | 1.000    |       | 0.000        | 0.000   | 15.706   | 1.000    |      |
| Cardiovascular death           | 0.000         | 0.000   | 59.466   | 1.000   |      | 0.000        | 0.000   |          |          |       | 0.000        | 0.000   |          |          |      |
| All-cause mortality            | 0.000         | 0.000   | 20.179   | 1.000   |      | 0.000        | 0.000   |          |          |       | 0.000        | 0.000   |          |          |      |
| Heart failure                  | 0.927         | 0.023   | 5.440    | 1.000   |      | 0.000        | 0.000   | 18.183   | 1.000    |       | 0.000        | 0.000   | 4.912    | 1.000    |      |
| Cardiomyopathy                 | 0.000         | 0.000   | 18.183   | 1.000   |      | 0.838        | 0.021   | 4.912    | 1.000    |       | 1.959        | 0.048   | 11.638   | 0.406    |      |
| Heart failure + Cardiomyopathy | 0.838         | 0.021   | 4.912    | 1.000   |      | 5.191        | 0.126   | 32.118   | 0.182    | SCN5A | 0.883        | 0.022   | 5.177    | 1.000    |      |
| Phenotype positive             | 1.959         | 0.048   | 11.638   | 0.406   |      | 3.166        | 0.077   | 19.105   | 0.278    |       | 1.444        | 0.505   | 3.372    | 0.444    |      |
| Ventricular arrhythmias        | 5.191         | 0.126   | 32.118   | 0.182   |      | 0.000        | 0.000   | 2.010    | 0.265    |       | 0.000        | 0.000   | 3.525    | 0.629    |      |
| Atrial arrhythmias             | 0.883         | 0.022   | 5.177    | 1.000   |      | 0.000        | 0.000   | 3.055    | 1.000    |       | 0.988        | 0.197   | 3.055    | 1.000    |      |
| Heart arrhythmia               | 3.166         | 0.077   | 19.105   | 0.278   |      | 8.961        | 0.194   | 74.405   | 0.122    |       | 0.000        | 0.000   | 192.656  | 1.000    |      |
| Chronic ischemic heart disease | 1.444         | 0.505   | 3.372    | 0.444   |      | 8.097        | 0.175   | 67.326   | 0.133    |       | 0.000        | 0.000   | 79.918   | 1.000    |      |
| Angina pectoris                | 0.000         | 0.000   | 2.010    | 0.265   |      | 0.000        | 0.000   | 216.918  | 1.000    |       | 0.000        | 0.000   | 35.791   | 1.000    |      |
| Cardiovascular death           | 0.000         | 0.000   | 3.525    | 0.629   |      | 0.000        | 0.000   | 130.632  | 1.000    | TNNC1 | 2.126        | 0.046   | 17.555   | 0.411    |      |
| All-cause mortality            | 0.988         | 0.197   | 3.055    | 1.000   |      | 5.158        | 0.112   | 42.747   | 0.200    |       | 0.000        | 0.000   | 37.806   | 1.000    |      |
| Heart failure                  | 0.000         | 0.000   | 6.036    | 1.000   |      | 7.373        | 0.700   | 45.159   | 0.047    |       | 0.000        | 0.000   | 31.281   | 1.000    |      |
| Cardiomyopathy                 | 0.000         | 0.000   | 31.281   | 1.000   |      | 0.000        | 0.000   | 5.451    | 1.000    |       | 0.000        | 0.000   | 12.879   | 1.000    |      |
| Heart failure + Cardiomyopathy | 0.000         | 0.000   | 5.451    | 1.000   |      | 8.852        | 0.212   | 56.217   | 0.112    |       | 0.000        | 0.000   | 12.879   | 1.000    |      |
| Phenotype positive             | 0.000         | 0.000   | 12.879   | 1.000   |      | 1.506        | 0.037   | 9.076    | 0.493    | TNNT3 | 8.852        | 0.212   | 56.217   | 0.112    |      |
| Ventricular arrhythmias        | 8.852         | 0.212   | 56.217   | 0.112   |      | 0.000        | 0.000   | 21.072   | 1.000    |       | 1.506        | 0.037   | 9.076    | 0.493    |      |
| Atrial arrhythmias             | 1.506         | 0.037   | 9.076    | 0.493   |      | 0.000        | 0.000   | 21.072   | 1.000    |       | 1.196        | 0.234   | 3.836    | 0.739    |      |
| Heart arrhythmia               | 0.000         | 0.000   | 21.072   | 1.000   |      | 2.902        | 0.566   | 9.356    | 0.097    |       | 0.000        | 0.000   | 165.176  | 1.000    |      |
| Chronic ischemic heart disease | 1.196         | 0.234   | 3.836    | 0.739   |      | 1.591        | 0.039   | 9.594    | 0.475    |       | 0.000        | 0.000   | 288.947  | 1.000    |      |
| Angina pectoris                | 2.902         | 0.566   | 9.356    | 0.097   |      | 1.117        | 0.130   | 4.390    | 0.701    |       | 0.000        | 0.000   | 98.466   | 1.000    |      |
| Cardiovascular death           | 1.591         | 0.039   | 9.594    | 0.475   |      | 1.735        | 0.042   | 10.530   | 0.447    |       | 8.655        | 0.207   | 54.922   | 0.115    |      |
| All-cause mortality            | 1.117         | 0.130   | 4.390    | 0.701   |      | 3.240        | 0.373   | 12.920   | 0.137    |       | 3.664        | 0.089   | 22.504   | 0.247    |      |
| Heart failure                  | 1.735         | 0.042   | 10.530   | 0.447   |      | 0.000        | 0.000   | 38.788   | 1.000    |       | 1.652        | 0.040   | 10.021   | 0.463    |      |
| Cardiomyopathy                 | 8.655         | 0.207   | 54.922   | 0.115   |      | 0.000        | 0.000   | 23.166   | 1.000    | TNNT2 | 1.319        | 0.257   | 4.272    | 0.504    |      |
| Heart failure + Cardiomyopathy | 3.240         | 0.373   | 12.920   | 0.137   |      | 0.000        | 0.000   | 4.272    | 0.504    |       | 0.999        | 0.024   | 6.034    | 1.000    |      |
| Phenotype positive             | 3.664         | 0.089   | 22.504   | 0.247   |      | 1.319        | 0.257   | 4.272    | 0.504    |       | 3.605        | 0.414   | 14.395   | 0.116    |      |
| Ventricular arrhythmias        | 0.000         | 0.000   | 38.788   | 1.000   |      | 0.999        | 0.024   | 6.034    | 1.000    |       | 3.605        | 0.414   | 14.395   | 0.116    |      |
| Atrial arrhythmias             | 1.652         | 0.040   | 10.021   | 0.463   |      | 3.605        | 0.414   | 14.395   | 0.116    |       | 1.907        | 0.371   | 6.184    | 0.227    |      |
| Heart arrhythmia               | 0.000         | 0.000   | 23.166   | 1.000   |      | 1.907        | 0.371   | 6.184    | 0.227    |       | 0.000        | 0.000   | 287.327  | 1.000    |      |
| Chronic ischemic heart disease | 1.319         | 0.257   | 4.272    | 0.504   |      | 0.000        | 0.000   | 1454.551 | 1.000    |       | 0.000        | 0.000   | 259.607  | 1.000    |      |
| Angina pectoris                | 0.999         | 0.024   | 6.034    | 1.000   |      | 0.000        | 0.000   | 604.765  | 1.000    |       | 0.000        | 0.000   | 1644.031 | 1.000    |      |
| Cardiovascular death           | 3.605         | 0.414   | 14.395   | 0.116   |      | 0.000        | 0.000   | 273.509  | 1.000    | TPM1  | 0.000        | 0.000   | 987.049  | 1.000    |      |
| All-cause mortality            | 1.907         | 0.371   | 6.184    | 0.227   |      | 0.000        | 0.000   | 67.908   | 1.000    |       | 0.000        | 0.000   | 165.176  | 1.000    |      |
| Heart failure                  | 0.000         | 0.000   | 287.327  | 1.000   |      | 3.585        | 2.012   | 6.014    | 2.20E-05 |       | 0.000        | 0.000   | 288.947  | 1.000    |      |
| Cardiomyopathy                 | 0.000         | 0.000   | 1454.551 | 1.000   |      | 10.241       | 4.492   | 21.287   | 3.20E-07 |       | 0.000        | 0.000   | 98.466   | 1.000    |      |
| Heart failure + Cardiomyopathy | 0.000         | 0.000   | 259.607  | 1.000   |      | 3.444        | 1.969   | 5.695    | 2.10E-05 |       | 0.000        | 0.000   | 288.947  | 1.000    |      |
| Phenotype positive             | 0.000         | 0.000   | 604.765  | 1.000   |      | 3.442        | 1.426   | 7.187    | 0.004    | TTN   | 3.442        | 1.426   | 7.187    | 0.004    |      |
| Ventricular arrhythmias        | 0.000         | 0.000   | 38.788   | 1.000   |      | 4.494        | 1.148   | 12.764   | 0.016    |       | 3.200        | 1.766   | 5.433    | 1.20E-04 |      |
| Atrial arrhythmias             | 1.652         | 0.040   | 10.021   | 0.463   |      | 2.741        | 0.716   | 7.515    | 0.068    |       | 0.000        | 0.000   | 67.908   | 1.000    |      |
| Heart arrhythmia               | 0.000         | 0.000   | 23.166   | 1.000   |      | 1.178        | 0.728   | 1.823    | 0.477    |       | 0.000        | 0.000   | 165.176  | 1.000    |      |
| Chronic ischemic heart disease | 1.319         | 0.257   | 4.272    | 0.504   |      | 1.178        | 0.728   | 1.823    | 0.477    |       | 0.000        | 0.000   | 288.947  | 1.000    |      |
| Angina pectoris                | 0.999         | 0.024   | 6.034    | 1.000   |      | 1.182        | 0.554   | 2.238    | 0.595    |       | 0.000        | 0.000   | 288.947  | 1.000    |      |
| Cardiovascular death           | 3.605         | 0.414   | 14.395   | 0.116   |      | 2.064        | 0.962   | 3.946    | 0.037    |       | 0.000        | 0.000   | 98.466   | 1.000    |      |
| All-cause mortality            | 1.907         | 0.371   | 6.184    | 0.227   |      | 1.229        | 0.699   | 2.027    | 0.404    |       | 0.000        | 0.000   | 98.466   | 1.000    |      |

Abbreviations:

ACTC1 : Actin Alpha Cardiac Muscle 1; ACTN2 : Alpha-actinin 2; ARVC: Arrhythmogenic right ventricular cardiomyopathy; BAG3 : BAG Cochaperone 3; CSRP3 : Cysteine And Glycine Rich Protein 3; DCM: Dilated cardiomyopathy; DES : Desmin; DSC2 : Desmocollin 2; DSG2 : Desmoglein 2; DSG2 : Desmoglein 2; DSP : desmoplakin; FLNC : Filamin-C; G+ : carriers of likely pathogenic and pathogenic variants associated with one of the cardiomyopathies; HCM: Hypertrophic cardiomyopathy; JPH2 : Junctophilin 2; JUP : Junction Plakoglobin; LCI: lower limit confidence interval; LMNA : Lamin A/C; MYBPC3 : Myosin Binding Protein C3; MYH7 : Myosin Heavy Chain 7; NEXN : Nexilin F-Actin Binding Protein; PKP2 : Plakophilin 2; PLN : phospholamban; RBM20 : RNA Binding Motif Protein 20; SCN5A : Sodium Voltage-Gated Channel Alpha Subunit 5; TNNC1 : Troponin C1, Slow Skeletal And Cardiac Type; TNNI3 : Troponin I3, Cardiac Type; TNNT2 : Troponin T2, Cardiac Type; TPM1 : Tropomyosin 1; TTN : Titin; UCI: upper limit confidence interval.

| Supplementary Table XI: Results of Fisher's Exact tests when excluding overlapping genes |               |         |         |          |                                   |         |         |          |                                  |         |         |          |              |         |         |          |
|------------------------------------------------------------------------------------------|---------------|---------|---------|----------|-----------------------------------|---------|---------|----------|----------------------------------|---------|---------|----------|--------------|---------|---------|----------|
|                                                                                          | ARVC G+ vs G- |         |         |          | DCM G+ vs G- (without ARVC genes) |         |         |          | DCM G+ vs G- (without HCM genes) |         |         |          | HCM G+ vs G- |         |         |          |
|                                                                                          | OR            | 95% LCI | 95% UCI | p-value  | OR                                | 95% LCI | 95% UCI | p-value  | OR                               | 95% LCI | 95% UCI | p-value  | OR           | 95% LCI | 95% UCI | p-value  |
| <b>CARDIOVASCULAR RISK FACTORS</b>                                                       |               |         |         |          |                                   |         |         |          |                                  |         |         |          |              |         |         |          |
| Diabetes                                                                                 | 1.136         | 0.741   | 1.684   | 0.530    | 0.819                             | 0.602   | 1.095   | 0.194    | 0.835                            | 0.595   | 1.147   | 0.293    | 1.682        | 1.348   | 2.083   | 4.20E-06 |
| Hypertension                                                                             | 0.989         | 0.762   | 1.276   | 0.949    | 1.092                             | 0.927   | 1.285   | 0.283    | 0.999                            | 0.831   | 1.198   | 1.000    | 1.025        | 0.875   | 1.197   | 0.753    |
| Hypercholesterolaemia                                                                    | 1.033         | 0.774   | 1.365   | 0.833    | 1.137                             | 0.949   | 1.356   | 0.156    | 1.057                            | 0.864   | 1.288   | 0.579    | 1.192        | 1.006   | 1.407   | 0.041    |
| Ever Smoked                                                                              | 1.158         | 0.905   | 1.479   | 0.244    | 1.223                             | 1.045   | 1.432   | 0.011    | 1.192                            | 1.002   | 1.418   | 0.044    | 0.869        | 0.745   | 1.013   | 0.069    |
| Family heart disease                                                                     | 1.386         | 1.086   | 1.770   | 0.007    | 1.134                             | 0.969   | 1.327   | 0.114    | 1.074                            | 0.902   | 1.277   | 0.434    | 1.010        | 0.869   | 1.173   | 0.910    |
| <b>CARDIAC DISEASE/OUTCOME</b>                                                           |               |         |         |          |                                   |         |         |          |                                  |         |         |          |              |         |         |          |
| Cardiac problem                                                                          | 2.604         | 0.513   | 8.240   | 0.120    | 1.052                             | 0.208   | 3.309   | 0.762    | 1.291                            | 0.255   | 4.065   | 0.511    | 1.262        | 0.327   | 3.497   | 0.563    |
| Heart failure                                                                            | 1.169         | 0.420   | 2.628   | 0.650    | 2.600                             | 1.713   | 3.837   | 8.40E-06 | 3.010                            | 1.955   | 4.497   | 1.00E-06 | 1.504        | 0.903   | 2.386   | 0.097    |
| Cardiomyopathy                                                                           | 0.956         | 0.023   | 5.708   | 1.000    | 7.963                             | 4.354   | 14.167  | 1.70E-10 | 6.807                            | 3.379   | 12.983  | 2.90E-07 | 5.681        | 2.936   | 10.526  | 5.20E-07 |
| Dilated cardiomyopathy                                                                   | 2.531         | 0.060   | 16.741  | 0.342    | 8.290                             | 3.003   | 21.263  | 4.40E-05 | 11.486                           | 4.365   | 28.657  | 1.40E-06 | 0.923        | 0.022   | 6.079   | 1.000    |
| Hypertrophic cardiomyopathy                                                              | 0.000         | 0.000   | 20.787  | 1.000    | 10.856                            | 3.095   | 35.820  | 1.40E-04 | 2.204                            | 0.050   | 16.486  | 0.39     | 17.990       | 6.569   | 51.615  | 1.10E-08 |
| Ventricular arrhythmias                                                                  | 7.664         | 2.835   | 17.818  | 9.50E-05 | 4.849                             | 2.201   | 9.888   | 8.70E-05 | 5.415                            | 2.368   | 11.317  | 7.10E-05 | 1.963        | 0.597   | 5.081   | 0.192    |
| Atrial arrhythmias                                                                       | 1.113         | 0.400   | 2.499   | 0.663    | 2.313                             | 1.507   | 3.444   | 1.40E-04 | 2.465                            | 1.556   | 3.766   | 1.10E-04 | 1.015        | 0.554   | 1.727   | 0.892    |
| Heart arrhythmia                                                                         | 2.642         | 0.690   | 7.242   | 0.075    | 2.685                             | 1.213   | 5.356   | 0.008    | 3.639                            | 1.706   | 7.089   | 0.001    | 0.477        | 0.056   | 1.815   | 0.435    |
| Chronic ischemic heart disease                                                           | 1.241         | 0.783   | 1.889   | 0.297    | 1.207                             | 0.901   | 1.594   | 0.176    | 1.318                            | 0.964   | 1.770   | 0.069    | 1.017        | 0.754   | 1.349   | 0.886    |
| Acute myocardial infarction                                                              | 1.443         | 0.728   | 2.600   | 0.215    | 1.163                             | 0.728   | 1.780   | 0.490    | 1.005                            | 0.573   | 1.653   | 0.900    | 0.863        | 0.517   | 1.368   | 0.659    |
| Cardiac arrest                                                                           | 0.000         | 0.000   | 4.064   | 1.000    | 2.549                             | 0.872   | 6.170   | 0.043    | 2.080                            | 0.534   | 5.863   | 0.145    | 1.140        | 0.224   | 3.638   | 0.747    |
| Angina pectoris                                                                          | 1.257         | 0.613   | 2.316   | 0.486    | 1.157                             | 0.732   | 1.756   | 0.500    | 0.901                            | 0.505   | 1.500   | 0.803    | 1.252        | 0.824   | 1.839   | 0.242    |
| Conduction disorders                                                                     | 1.899         | 0.797   | 3.891   | 0.084    | 1.633                             | 0.921   | 2.723   | 0.080    | 1.409                            | 0.708   | 2.554   | 0.289    | 1.289        | 0.700   | 2.208   | 0.361    |
| Valvular disease                                                                         | 1.179         | 0.498   | 2.394   | 0.558    | 2.016                             | 1.345   | 2.937   | 0.001    | 1.866                            | 1.173   | 2.852   | 0.006    | 1.074        | 0.640   | 1.708   | 0.716    |
| Congenital heart disease                                                                 | 2.536         | 0.291   | 10.141  | 0.199    | 1.542                             | 0.299   | 5.010   | 0.452    | 1.259                            | 0.145   | 5.016   | 0.675    | 1.385        | 0.269   | 4.500   | 0.486    |
| Pulmonary obstructive disease                                                            | 1.704         | 1.051   | 2.643   | 0.026    | 1.205                             | 0.845   | 1.677   | 0.280    | 1.112                            | 0.739   | 1.618   | 0.551    | 0.695        | 0.450   | 1.033   | 0.081    |
| Cardiovascular death                                                                     | 1.579         | 0.665   | 3.223   | 0.254    | 1.605                             | 0.951   | 2.574   | 0.058    | 1.879                            | 1.097   | 3.049   | 0.016    | 0.495        | 0.196   | 1.046   | 0.064    |
| All-cause mortality                                                                      | 1.036         | 0.567   | 1.756   | 0.891    | 1.432                             | 1.037   | 1.940   | 0.022    | 1.290                            | 0.888   | 1.826   | 0.145    | 0.643        | 0.413   | 0.961   | 0.032    |

Abbreviations:

ARVC: arrhythmogenic right ventricular cardiomyopathy; DCM: dilated cardiomyopathy; G+: carriers of likely pathogenic and pathogenic variants associated with one of the cardiomyopathies; HCM: hypertrophic cardiomyopathy; LCI: lower limit confidence interval; UCI: upper limit confidence interval.

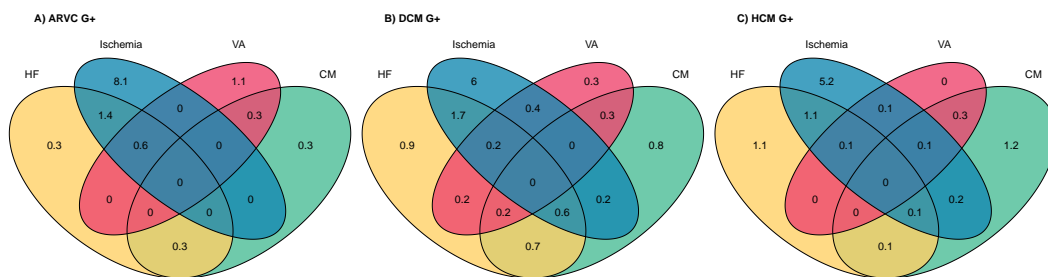

**Figure I:** Overlap cardiac diagnoses per inherited cardiomyopathy

The Venn diagram of the overlap between cardiomyopathy, heart failure, ventricular arrhythmia and chronic ischemic heart diagnoses in G+ individuals. The numbers in the diagram are the percentages of individuals diagnosed in the G+ of the specified cardiomyopathy.

*Abbreviations: ARVC= arrhythmogenic right ventricular cardiomyopathy; CM= cardiomyopathy; DCM= dilated cardiomyopathy; G+= pathogenic variant carrier; HCM= hypertrophic cardiomyopathy; HF= heart failure; VA= ventricular arrhythmias.*

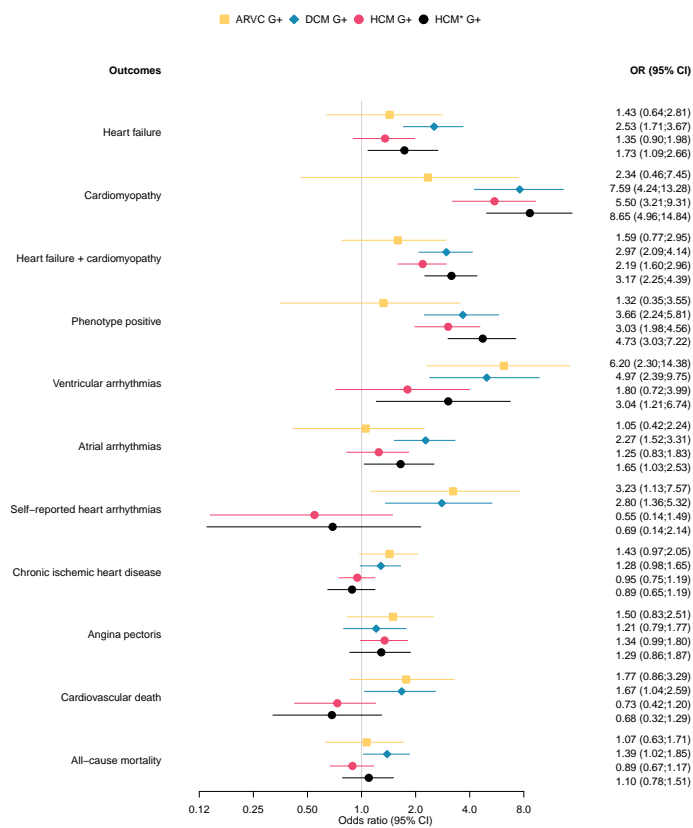

**Figure II:** Forest plot cardiac outcomes stratified per inherited cardiomyopathy

Odds ratios and 95% confidence intervals are given for the associations between cardiac outcomes and ARVC, DCM, or HCM pathogenic variant carriers.

*Abbreviations: ARVC= arrhythmogenic right ventricular cardiomyopathy; DCM= dilated cardiomyopathy; G+= pathogenic variant carrier; HCM= hypertrophic cardiomyopathy.*

\* strict HCM group: HCM group after excluding carriers of the 3628-41\_3628-17del MYBPC3 and the Arg278Cys 862C>T TNNT2 variant.

### A) ARVC

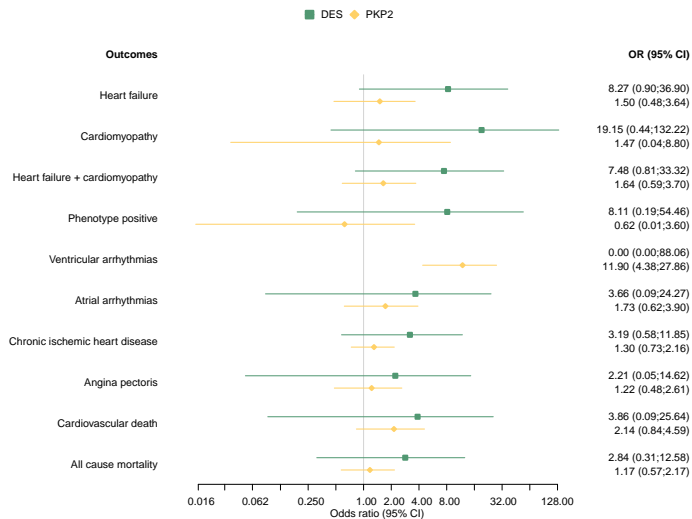

### B) DCM

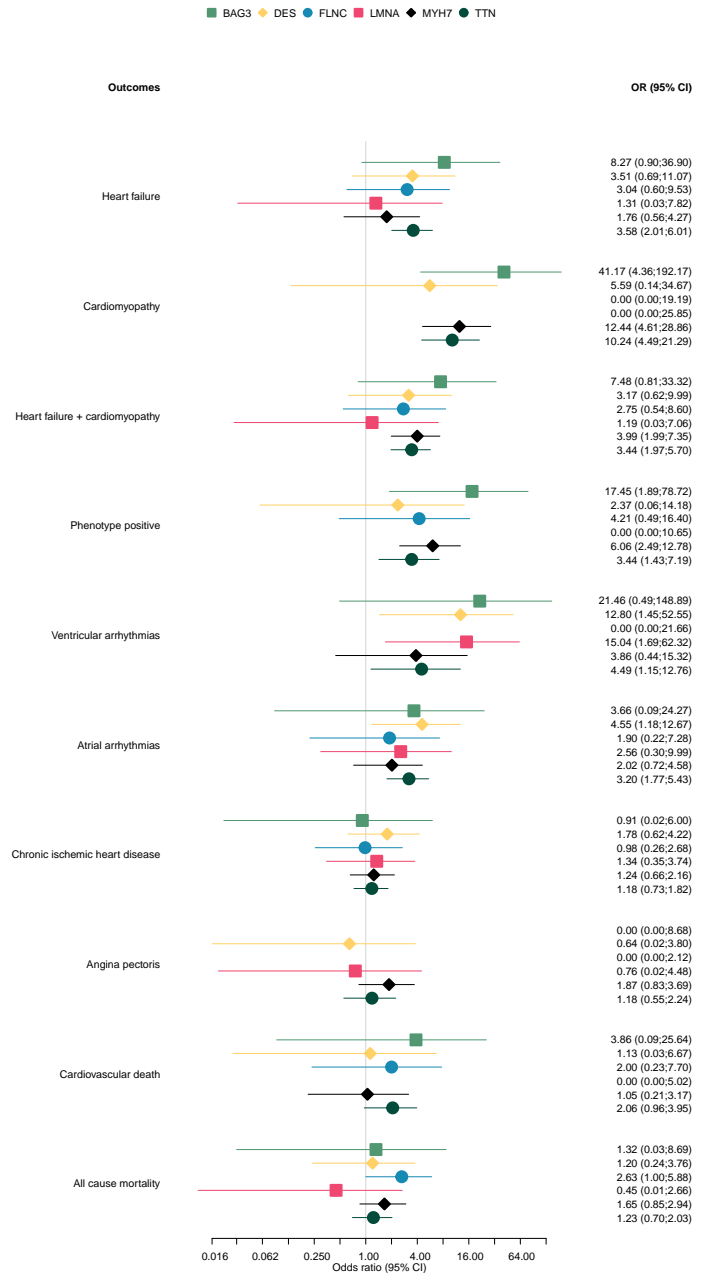

### C) HCM

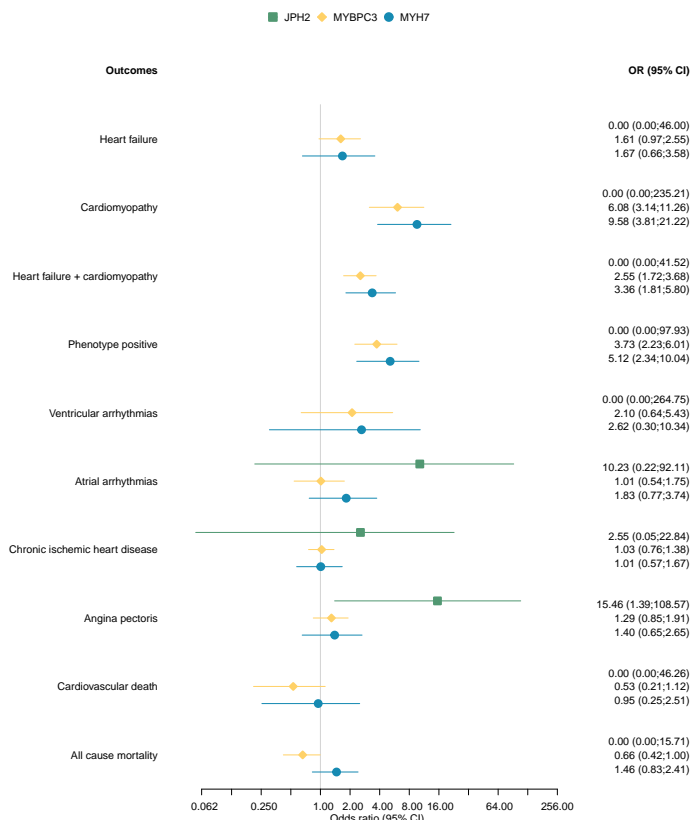

**Figure III:** Forest plot cardiac outcomes stratified per inherited cardiomyopathy and gene

Odds ratios and 95% confidence intervals are given for the associations between cardiac outcomes and A) ARVC, B) DCM, or C) HCM pathogenic variant carriers stratified by gene. Results are only visualized for genes with at least one significant result.

*Abbreviations: ARVC= arrhythmogenic right ventricular cardiomyopathy; DCM= dilated cardiomyopathy; HCM= hypertrophic cardiomyopathy.*



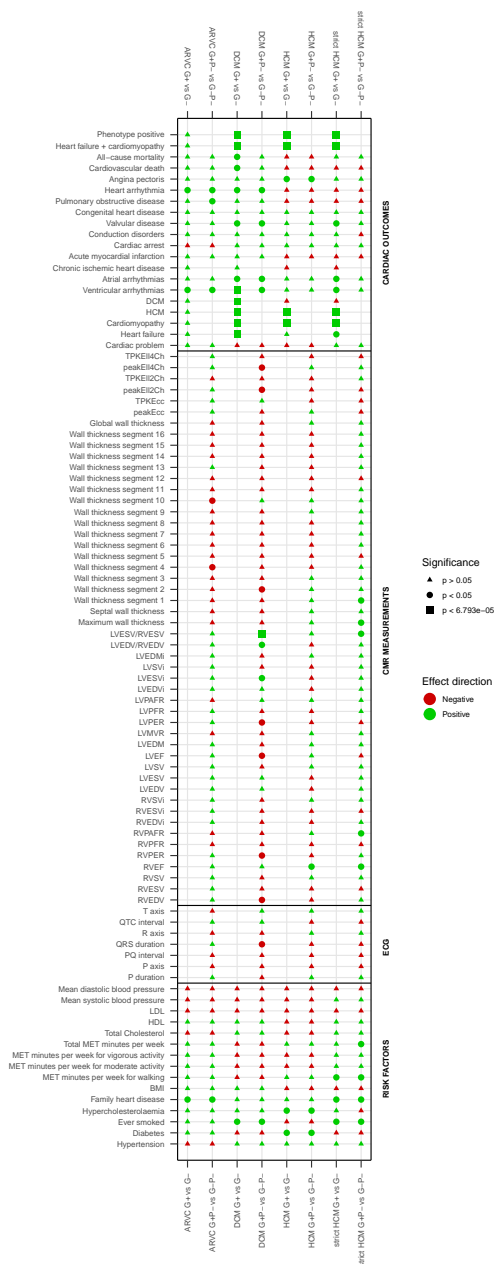

**Figure IV:** Matrix of all differences tested

Summary of p-values and effect direction for all performed tests in this study. The p-value is indicated by the shape of the symbol, whereas the effect direction is represented by the color. Red color indicates an odds ratio smaller than one for categorical variables and a lower mean value for the G+ compared to the G- group for continuous variables. No symbol indicates the test was not performed.

*Abbreviations: ARVC= arrhythmogenic right ventricular cardiomyopathy; CMR= cardiac magnetic resonance imaging; DCM= dilated cardiomyopathy; ECG= Electrocardiography; G+= pathogenic variant carrier; HCM= hypertrophic cardiomyopathy; P-= phenotype negative individual; P+= phenotype positive individual.*
